# Supplementary material for: FATS inhibits the Wnt pathway and induces apoptosis through degradation of MYH9 and enhances sensitivity to paclitaxel in breast cancer
Source: Research Square preprint supplement (doi:10.21203/rs.3.rs-4186589/v1), 2024-05-02
Supplement: Supplementary file 1 [file 9a7001f7b938ad84017f3277.xlsx]

## Sheet: Summary
Header line description of workshhet "Proteins"
Accession	蛋白编号	Protein accession number of database used for search.
Protein names	蛋白名称	Names of proteins this peptide is associated with.
Gene names	基因名称	Indicates the name of the gene that code for the protein sequence.
MW [kDa]	蛋白分子量（kDa）	Protein molecular weight.
Protein score	蛋白打分值	Score for protein matching degree (the higher score, the better matching).
Sequence coverage (%)	序列覆盖率（%）	Percent of identified peptide sequence covering in protein sequence.
Unique Peptides	特异性肽段数目	Number of unique peptides which spectrums hit.
Peptides	肽段数目	Number of peptides which spectrums hit.
PSMs	二级谱图数目	Number of peptide-spectrum matches.
Abundances	丰度	Displays the abundances of the samples before scaling and normalization.
Header line description of workshhet "Peptides"
Sequence	肽段序列	Identified peptide amino acid sequence.
Modifications	修饰类型	The modification composition of the peptide isoform group.
Accession	蛋白编号	Protein accession number of database used for search.
PSMs	二级谱图数目	Number of peptide-spectrum matches.
Missed Cleavages	漏切位点数	Number of missed enzymatic cleavages.
Theo. MH+ [Da]	分子量	The theoretical MH+ mass of the modified peptide in Daltons.
Abundances	丰度	Displays the abundances of the samples before scaling and normalization.
Charge	电荷数	Carried charge of peptide.
DeltaM [ppm]	质量误差（ppm）	Deviation of the measured mass from the theoretical mass of the peptide, in ppm.
RT [min]	保留时间	The uncalibrated retention time in minutes in the elution profile of the precursor ion.
Ions Score	肽段打分值	The score for the observed MS/MS match between the experimental data and the database sequence.

## Sheet: Proteins
Accession	Protein names	Gene names	MW [kDa]	Protein score	Sequence coverage (%)	Unique Peptides	Peptides	PSMs	Abundances
P63261	Actin, cytoplasmic 2	ACTG1	41.8	13609	77	1	30	416	5.90e+07
P60709	Actin, cytoplasmic 1	ACTB	41.7	13479	77	1	30	412	4.38e+10
Q15149	Plectin	PLEC	531.5	11575	54	222	223	281	4.49e+09
P35579	Myosin-9	MYH9	226.4	11511	61	119	140	269	8.11e+09
Q13813	Spectrin alpha chain, non-erythrocytic 1	SPTAN1	284.4	7697	57	118	118	169	1.91e+09
P21333	Filamin-A	FLNA	280.6	7065	57	98	104	155	3.24e+09
Q6S8J3	POTE ankyrin domain family member E	POTEE	121.3	6223	13	2	11	193	2.41e+08
Q01082	Spectrin beta chain, non-erythrocytic 1	SPTBN1	274.4	5907	58	104	111	146	1.51e+09
P68133	Actin, alpha skeletal muscle	ACTA1	42	5814	31	2	16	230	6.09e+08
P08670	Vimentin	VIM	53.6	4934	83	46	49	132	1.00e+10
O75369	Filamin-B	FLNB	278	3806	43	74	80	98	7.76e+08
P46940	Ras GTPase-activating-like protein IQGAP1	IQGAP1	189.1	2805	44	53	53	67	5.47e+08
Q562R1	Beta-actin-like protein 2	ACTBL2	42	2655	21	2	9	85	3.44e+09
O00159	Unconventional myosin-Ic	MYO1C	121.6	2389	45	42	42	61	1.24e+09
Q9UHB6	LIM domain and actin-binding protein 1	LIMA1	85.2	2358	54	37	37	52	6.01e+08
O43707	Alpha-actinin-4	ACTN4	104.8	2250	56	22	40	51	4.43e+08
Q12965	Unconventional myosin-Ie	MYO1E	127	1771	46	35	41	52	1.19e+09
Q8WWI1	LIM domain only protein 7	LMO7	192.6	1732	30	37	37	42	2.66e+08
P12814	Alpha-actinin-1	ACTN1	103	1672	49	17	35	45	1.12e+08
Q92614	Unconventional myosin-XVIIIa	MYO18A	233	1602	26	40	40	43	1.47e+08
O43795	Unconventional myosin-Ib	MYO1B	131.9	1496	38	32	32	39	2.67e+08
P35580	Myosin-10	MYH10	228.9	1283	12	6	23	33	1.20e+07
Q16643	Drebrin	DBN1	71.4	1136	28	15	15	25	4.60e+08
Q9NYL9	Tropomodulin-3	TMOD3	39.6	1028	59	19	19	26	3.99e+08
Q16891	MICOS complex subunit MIC60	IMMT	83.6	1017	39	20	20	23	9.65e+07
P68363	Tubulin alpha-1B chain	TUBA1B	50.1	964	51	16	16	21	2.83e+08
P15924	Desmoplakin	DSP	331.6	957	11	22	22	22	6.59e+07
P52907	F-actin-capping protein subunit alpha-1	CAPZA1	32.9	941	67	11	13	22	5.38e+08
O95425	Supervillin	SVIL	247.6	932	9	16	16	18	3.63e+07
Q27J81	Inverted formin-2	INF2	135.5	931	25	22	22	23	9.85e+07
P11142	Heat shock cognate 71 kDa protein	HSPA8	70.9	891	27	11	14	18	1.26e+08
P07355	Annexin A2	ANXA2	38.6	851	55	18	18	21	2.14e+08
P07437	Tubulin beta chain	TUBB	49.6	841	51	4	16	22	2.54e+08
P19105	Myosin regulatory light chain 12A	MYL12A	19.8	836	80	1	10	20
P67936	Tropomyosin alpha-4 chain	TPM4	28.5	805	38	4	13	17	7.06e+07
O14950	Myosin regulatory light chain 12B	MYL12B	19.8	799	80	1	10	19	5.66e+08
P47756	F-actin-capping protein subunit beta	CAPZB	30.6	776	59	18	18	24	4.30e+08
P68371	Tubulin beta-4B chain	TUBB4B	49.8	768	52	4	16	21	2.78e+07
Q9UM54	Unconventional myosin-VI	MYO6	149.6	764	20	22	22	24	7.54e+07
P60660	Myosin light polypeptide 6	MYL6	16.9	668	84	10	10	15	9.43e+08
P06753	Tropomyosin alpha-3 chain	TPM3	32.9	663	35	7	14	18	3.14e+08
O15020	Spectrin beta chain, non-erythrocytic 2	SPTBN2	271.2	649	6	5	12	15	6.94e+06
P61158	Actin-related protein 3	ACTR3	47.3	647	50	15	15	19	1.05e+08
Q8IVT2	Mitotic interactor and substrate of PLK1	MISP	75.3	635	36	19	19	20	2.01e+08
Q9UPQ0	LIM and calponin homology domains-containing protein 1	LIMCH1	121.8	621	19	15	15	15	5.11e+07
P24844	Myosin regulatory light polypeptide 9	MYL9	19.8	606	44	1	6	14	4.82e+06
P45880	Voltage-dependent anion-selective channel protein 2	VDAC2	31.5	602	53	11	11	12	1.54e+08
P47755	F-actin-capping protein subunit alpha-2	CAPZA2	32.9	600	48	8	10	12	8.45e+07
Q86V48	Leucine zipper protein 1	LUZP1	120.2	589	17	17	17	18	5.08e+07
P35609	Alpha-actinin-2	ACTN2	103.8	584	13	1	11	15	9.55e+06
Q9Y2D5	A-kinase anchor protein 2	AKAP2	94.6	581	19	12	12	13	5.26e+07
P0DP23	Calmodulin-1	CALM1	16.8	575	42	7	7	12	1.84e+08
Q14573	Inositol 1,4,5-trisphosphate receptor type 3	ITPR3	303.9	574	9	16	19	20	7.14e+07
P15328	Folate receptor alpha	FOLR1	29.8	572	47	7	7	12	1.18e+08
Q9ULV4	Coronin-1C	CORO1C	53.2	539	32	11	11	12	1.05e+08
Q12792	Twinfilin-1	TWF1	40.3	537	33	9	9	10	1.03e+08
P07951	Tropomyosin beta chain	TPM2	32.8	531	25	1	10	13	2.18e+06
P11021	Endoplasmic reticulum chaperone BiP	HSPA5	72.3	530	26	9	11	12	3.10e+07
P62136	Serine/threonine-protein phosphatase PP1-alpha catalytic subunit	PPP1CA	37.5	529	42	2	11	13	7.07e+07
O00571	ATP-dependent RNA helicase DDX3X	DDX3X	73.2	506	17	8	8	10	1.97e+07
P68104	Elongation factor 1-alpha 1	EEF1A1	50.1	494	37	10	10	14	1.86e+08
P36873	Serine/threonine-protein phosphatase PP1-gamma catalytic subunit	PPP1CC	37	479	40	1	10	11	3.33e+06
Q13045	Protein flightless-1 homolog	FLII	144.7	468	14	15	15	16	8.54e+07
P62140	Serine/threonine-protein phosphatase PP1-beta catalytic subunit	PPP1CB	37.2	463	33	1	9	10	3.26e+06
P0DMV8	Heat shock 70 kDa protein 1A	HSPA1A	70	463	22	8	10	10	3.56e+07
P61160	Actin-related protein 2	ACTR2	44.7	454	27	7	7	10	5.91e+07
P09493	Tropomyosin alpha-1 chain	TPM1	32.7	453	23	2	9	11	8.88e+06
Q7Z406	Myosin-14	MYH14	227.7	452	5	2	10	14	1.07e+06
P14923	Junction plakoglobin	JUP	81.7	452	19	12	12	12	3.04e+07
Q96C19	EF-hand domain-containing protein D2	EFHD2	26.7	451	48	8	10	13	2.18e+08
Q14247	Src substrate cortactin	CTTN	61.5	449	25	11	11	12	6.29e+07
Q6WCQ1	Myosin phosphatase Rho-interacting protein	MPRIP	116.5	443	20	13	13	14	2.02e+07
Q00839	Heterogeneous nuclear ribonucleoprotein U	HNRNPU	90.5	381	10	5	5	6	2.06e+07
Q96M02	(E2-independent) E3 ubiquitin-conjugating enzyme FATS	C10orf90	77.9	373	21	12	12	12	6.11e+07
P28290	Protein ITPRID2	ITPRID2	138.3	353	8	9	9	9	1.93e+07
Q14643	Inositol 1,4,5-trisphosphate receptor type 1	ITPR1	313.7	347	4	7	10	11	9.31e+06
Q6NYC8	Phostensin	PPP1R18	67.9	305	17	8	8	8	3.23e+07
Q9BUP0	EF-hand domain-containing protein D1	EFHD1	26.9	287	51	7	9	10	2.99e+07
O14974	Protein phosphatase 1 regulatory subunit 12A	PPP1R12A	115.2	280	11	10	10	10	2.08e+07
P62805	Histone H4	H4C16	11.4	280	51	6	6	7	1.93e+08
O00160	Unconventional myosin-If	MYO1F	124.8	277	6	1	7	9	4.17e+07
P04406	Glyceraldehyde-3-phosphate dehydrogenase	GAPDH	36	276	25	5	5	5	4.87e+07
P59998	Actin-related protein 2/3 complex subunit 4	ARPC4	19.7	254	49	7	7	7	1.07e+08
P05187	Alkaline phosphatase, placental type	ALPP	57.9	253	18	5	6	7	1.95e+07
P13797	Plastin-3	PLS3	70.8	252	14	7	7	7	3.32e+07
Q9NX63	MICOS complex subunit MIC19	CHCHD3	26.1	250	31	6	6	6	4.88e+07
P08238	Heat shock protein HSP 90-beta	HSP90AB1	83.2	250	11	4	7	8	2.05e+07
P06748	Nucleophosmin	NPM1	32.6	249	18	3	3	4	1.12e+07
P08174	Complement decay-accelerating factor	CD55	41.4	248	15	5	5	6	2.27e+07
P31943	Heterogeneous nuclear ribonucleoprotein H	HNRNPH1	49.2	248	20	4	5	6	1.24e+07
Q00610	Clathrin heavy chain 1	CLTC	191.5	244	5	7	7	7	1.32e+07
O15231	Zinc finger protein 185	ZNF185	73.5	244	16	8	8	8	1.56e+07
Q05682	Caldesmon	CALD1	93.2	243	10	6	6	6	2.66e+07
Q96PK6	RNA-binding protein 14	RBM14	69.4	230	11	6	6	6	1.66e+07
Q9Y446	Plakophilin-3	PKP3	87	225	11	7	7	7	1.43e+07
P02545	Prelamin-A/C	LMNA	74.1	216	11	6	6	6	1.53e+07
Q16352	Alpha-internexin	INA	55.4	214	18	6	7	7	1.09e+07
Q9Y512	Sorting and assembly machinery component 50 homolog	SAMM50	51.9	212	15	6	6	6	3.04e+07
O14880	Microsomal glutathione S-transferase 3	MGST3	16.5	212	34	3	3	4	3.48e+07
P62701	40S ribosomal protein S4, X isoform	RPS4X	29.6	212	19	5	5	6	1.40e+07
O15144	Actin-related protein 2/3 complex subunit 2	ARPC2	34.3	211	31	9	9	9	7.63e+07
P16278	Beta-galactosidase	GLB1	76	206	11	5	5	5	1.70e+07
Q32MZ4	Leucine-rich repeat flightless-interacting protein 1	LRRFIP1	89.2	203	7	3	4	4	3.15e+06
P05141	ADP/ATP translocase 2	SLC25A5	32.8	202	25	4	6	6	6.92e+07
P07900	Heat shock protein HSP 90-alpha	HSP90AA1	84.6	202	8	2	5	6	4.88e+06
P02768	Albumin	ALB	69.3	195	9	6	6	7	2.55e+07
Q96N67	Dedicator of cytokinesis protein 7	DOCK7	242.4	194	3	6	6	6	2.44e+07
O15145	Actin-related protein 2/3 complex subunit 3	ARPC3	20.5	194	48	6	6	7	4.60e+07
Q9Y277	Voltage-dependent anion-selective channel protein 3	VDAC3	30.6	192	27	5	5	5	2.62e+07
O14639	Actin-binding LIM protein 1	ABLIM1	87.6	189	8	5	5	5	3.28e+07
P62826	GTP-binding nuclear protein Ran	RAN	24.4	186	34	7	7	7	6.99e+07
P23528	Cofilin-1	CFL1	18.5	183	40	4	4	4	1.57e+07
P05109	Protein S100-A8	S100A8	10.8	182	40	4	4	5	1.30e+07
P46783	40S ribosomal protein S10	RPS10	18.9	177	23	3	3	4	1.37e+07
Q9BQI0	Allograft inflammatory factor 1-like	AIF1L	17.1	175	27	3	3	4	1.28e+07
Q0ZGT2	Nexilin	NEXN	80.6	174	10	6	6	6	1.89e+07
P30050	60S ribosomal protein L12	RPL12	17.8	174	24	3	3	3	1.24e+07
Q07157	Tight junction protein ZO-1	TJP1	195.3	172	4	5	5	5	4.59e+06
P27348	14-3-3 protein theta	YWHAQ	27.7	161	15	2	3	4	7.11e+06
Q8N3V7	Synaptopodin	SYNPO	99.4	160	6	3	3	3	1.31e+07
P22626	Heterogeneous nuclear ribonucleoproteins A2/B1	HNRNPA2B1	37.4	158	16	4	5	5	1.94e+07
P05186	Alkaline phosphatase, tissue-nonspecific isozyme	ALPL	57.3	157	9	4	4	4	1.36e+07
Q9Y608	Leucine-rich repeat flightless-interacting protein 2	LRRFIP2	82.1	156	7	3	4	4	1.54e+07
Q08211	ATP-dependent RNA helicase A	DHX9	140.9	154	5	4	4	4	3.20e+06
P21796	Voltage-dependent anion-selective channel protein 1	VDAC1	30.8	151	29	5	5	5	2.10e+07
Q5QNW6	Histone H2B type 2-F	H2BC18	13.9	150	29	4	4	6	1.71e+08
Q9UDY2	Tight junction protein ZO-2	TJP2	133.9	148	6	6	6	6	9.23e+06
Q9UPN3	Microtubule-actin cross-linking factor 1, isoforms 1/2/3/4/5	MACF1	837.8	146	1	4	5	5	2.04e+07
Q16658	Fascin	FSCN1	54.5	141	12	5	5	5	1.14e+07
Q06830	Peroxiredoxin-1	PRDX1	22.1	139	29	5	5	5	6.40e+07
P61978	Heterogeneous nuclear ribonucleoprotein K	HNRNPK	50.9	137	7	3	3	3	1.22e+07
P52597	Heterogeneous nuclear ribonucleoprotein F	HNRNPF	45.6	135	12	2	3	3	7.33e+05
O15143	Actin-related protein 2/3 complex subunit 1B	ARPC1B	40.9	132	11	3	3	4	3.03e+07
P13639	Elongation factor 2	EEF2	95.3	132	5	4	4	4	1.14e+07
P63104	14-3-3 protein zeta/delta	YWHAZ	27.7	131	17	2	3	4	1.09e+06
A2NJV5	Immunoglobulin kappa variable 2-29	IGKV2-29	13.1	129	17	2	2	3	5.63e+08
P04792	Heat shock protein beta-1	HSPB1	22.8	125	23	4	4	4	1.19e+07
P60842	Eukaryotic initiation factor 4A-I	EIF4A1	46.1	122	9	3	3	3	8.28e+06
P12236	ADP/ATP translocase 3	SLC25A6	32.8	122	11	1	3	3	2.80e+06
P09923	Intestinal-type alkaline phosphatase	ALPI	56.8	121	6	2	3	4	2.05e+06
P49411	Elongation factor Tu, mitochondrial	TUFM	49.8	120	9	3	3	3	1.17e+07
P05388	60S acidic ribosomal protein P0	RPLP0	34.3	119	12	4	4	4	1.59e+07
Q69YQ0	Cytospin-A	SPECC1L	124.5	116	3	3	3	3	2.77e+06
P23396	40S ribosomal protein S3	RPS3	26.7	115	21	5	5	5	3.95e+07
P26373	60S ribosomal protein L13	RPL13	24.2	113	18	4	4	4	2.53e+07
Q9Y6C9	Mitochondrial carrier homolog 2	MTCH2	33.3	112	17	3	3	3	6.16e+06
Q86SQ0	Pleckstrin homology-like domain family B member 2	PHLDB2	142.1	112	3	3	3	3	2.14e+06
P46782	40S ribosomal protein S5	RPS5	22.9	112	7	1	1	2	5.61e+06
P40429	60S ribosomal protein L13a	RPL13A	23.6	109	14	3	3	3	9.83e+06
Q96SB3	Neurabin-2	PPP1R9B	89.3	107	4	2	2	2	3.40e+06
P62263	40S ribosomal protein S14	RPS14	16.3	106	21	2	2	2	7.30e+06
P27635	60S ribosomal protein L10	RPL10	24.6	104	19	5	5	5	1.10e+07
P62081	40S ribosomal protein S7	RPS7	22.1	103	22	3	3	3	1.05e+07
P23246	Splicing factor, proline- and glutamine-rich	SFPQ	76.1	101	3	2	2	2	2.75e+06
P62241	40S ribosomal protein S8	RPS8	24.2	101	19	3	3	3	6.34e+06
P19338	Nucleolin	NCL	76.6	99	6	3	3	3	5.41e+06
P63010	AP-2 complex subunit beta	AP2B1	104.5	99	2	1	1	1	9.00e+05
Q14126	Desmoglein-2	DSG2	122.2	99	2	2	2	2	7.27e+06
P38646	Stress-70 protein, mitochondrial	HSPA9	73.6	98	6	3	3	3	1.01e+07
P09382	Galectin-1	LGALS1	14.7	97	19	2	2	3	9.17e+06
O00299	Chloride intracellular channel protein 1	CLIC1	26.9	97	7	1	1	1	2.21e+06
P62987	Ubiquitin-60S ribosomal protein L40	UBA52	14.7	94	17	2	2	3	2.05e+07
O43175	D-3-phosphoglycerate dehydrogenase	PHGDH	56.6	93	5	2	2	2	2.97e+06
Q16777	Histone H2A type 2-C	H2AC20	14	92	27	3	3	4	1.66e+08
Q71UM5	40S ribosomal protein S27-like	RPS27L	9.5	92	25	2	2	2	8.34e+06
P62269	40S ribosomal protein S18	RPS18	17.7	92	17	3	3	3	2.57e+07
P62913	60S ribosomal protein L11	RPL11	20.2	92	15	2	2	2	7.46e+06
Q96FS4	Signal-induced proliferation-associated protein 1	SIPA1	112.1	91	2	2	2	3	3.05e+06
P62249	40S ribosomal protein S16	RPS16	16.4	90	15	2	2	3	2.26e+07
O15061	Synemin	SYNM	172.8	90	2	3	3	3	7.47e+06
A0A2R8Y4L2	Heterogeneous nuclear ribonucleoprotein A1-like 3	HNRNPA1L3	29.2	89	12	2	3	3	1.14e+06
Q15366	Poly(rC)-binding protein 2	PCBP2	38.6	89	7	2	2	2	4.98e+06
O96008	Mitochondrial import receptor subunit TOM40 homolog	TOMM40	37.9	86	8	2	2	2	4.45e+06
P61513	60S ribosomal protein L37a	RPL37A	10.3	84	28	2	2	2	2.26e+06
Q9C0C2	182 kDa tankyrase-1-binding protein	TNKS1BP1	181.7	83	1	2	2	2	8.20e+05
P62937	Peptidyl-prolyl cis-trans isomerase A	PPIA	18	83	14	2	2	2	1.24e+06
P18085	ADP-ribosylation factor 4	ARF4	20.5	82	12	1	2	2	2.03e+06
Q9BPX5	Actin-related protein 2/3 complex subunit 5-like protein	ARPC5L	16.9	80	16	2	2	2	2.56e+07
P62258	14-3-3 protein epsilon	YWHAE	29.2	80	9	1	2	3	1.44e+06
P62873	Guanine nucleotide-binding protein G(I)/G(S)/G(T) subunit beta-1	GNB1	37.4	79	9	3	3	3	7.85e+06
P61247	40S ribosomal protein S3a	RPS3A	29.9	78	10	2	2	3	2.00e+06
Q92841	Probable ATP-dependent RNA helicase DDX17	DDX17	80.2	77	3	2	2	2	5.10e+06
P61204	ADP-ribosylation factor 3	ARF3	20.6	76	12	1	2	2	7.12e+06
P10599	Thioredoxin	TXN	11.7	76	21	2	2	2	8.31e+06
Q9Y285	Phenylalanine--tRNA ligase alpha subunit	FARSA	57.5	75	2	1	1	1	7.67e+05
Q96FJ2	Dynein light chain 2, cytoplasmic	DYNLL2	10.3	75	25	2	2	2	1.02e+07
P27708	CAD protein	CAD	242.8	75	1	2	2	2	2.13e+06
P62280	40S ribosomal protein S11	RPS11	18.4	74	21	4	4	4	1.48e+07
O94905	Erlin-2	ERLIN2	37.8	74	7	2	2	2	2.61e+06
P83731	60S ribosomal protein L24	RPL24	17.8	73	8	1	1	1	4.59e+06
P04899	Guanine nucleotide-binding protein G(i) subunit alpha-2	GNAI2	40.4	72	8	1	2	2
O15260	Surfeit locus protein 4	SURF4	30.4	71	5	1	1	1
P62899	60S ribosomal protein L31	RPL31	14.5	71	7	1	1	1	4.32e+06
P38919	Eukaryotic initiation factor 4A-III	EIF4A3	46.8	71	3	1	1	1
P28288	ATP-binding cassette sub-family D member 3	ABCD3	75.4	70	4	2	2	2	6.90e+05
O75431	Metaxin-2	MTX2	29.7	68	8	2	2	2	1.34e+06
Q02878	60S ribosomal protein L6	RPL6	32.7	68	5	1	1	1
Q14254	Flotillin-2	FLOT2	47	66	6	2	2	2	4.13e+06
P62750	60S ribosomal protein L23a	RPL23A	17.7	66	8	1	1	1	4.43e+06
P52272	Heterogeneous nuclear ribonucleoprotein M	HNRNPM	77.5	66	3	2	2	2	1.70e+06
Q12931	Heat shock protein 75 kDa, mitochondrial	TRAP1	80.1	64	2	1	1	1	9.14e+06
Q5M775	Cytospin-B	SPECC1	118.5	64	2	2	2	2	1.05e+06
Q92747	Actin-related protein 2/3 complex subunit 1A	ARPC1A	41.5	63	8	2	2	2	4.26e+06
P62244	40S ribosomal protein S15a	RPS15A	14.8	63	18	2	2	2	8.32e+06
P61026	Ras-related protein Rab-10	RAB10	22.5	62	6	1	1	1	1.26e+06
Q5D862	Filaggrin-2	FLG2	247.9	62	0	1	1	1	2.61e+06
P00966	Argininosuccinate synthase	ASS1	46.5	61	4	2	2	2	7.50e+06
P39023	60S ribosomal protein L3	RPL3	46.1	61	5	2	2	2	6.23e+06
P35268	60S ribosomal protein L22	RPL22	14.8	61	10	1	1	1	3.87e+06
Q99569	Plakophilin-4	PKP4	131.8	59	2	2	2	2	4.43e+05
Q9Y2H5	Pleckstrin homology domain-containing family A member 6	PLEKHA6	117.1	58	2	2	2	2	3.44e+06
Q5TEC6	Histone H3-7	H3-7	15.4	56	13	2	2	2	4.89e+07
Q9Y678	Coatomer subunit gamma-1	COPG1	97.7	56	1	1	1	1	3.69e+05
P18077	60S ribosomal protein L35a	RPL35A	12.5	56	15	2	2	2	6.10e+06
P63173	60S ribosomal protein L38	RPL38	8.2	55	19	1	1	1	3.34e+06
P09874	Poly [ADP-ribose] polymerase 1	PARP1	113	55	3	2	2	2	3.03e+06
Q6IBS0	Twinfilin-2	TWF2	39.5	53	5	1	1	1
P38159	RNA-binding motif protein, X chromosome	RBMX	42.3	53	3	1	1	1	1.31e+06
P62917	60S ribosomal protein L8	RPL8	28	52	4	1	1	1	7.54e+06
P61254	60S ribosomal protein L26	RPL26	17.2	52	11	2	2	2	7.02e+06
P62318	Small nuclear ribonucleoprotein Sm D3	SNRPD3	13.9	52	8	1	1	1	1.72e+06
Q14244	Ensconsin	MAP7	84	52	2	1	1	1	2.51e+05
P40939	Trifunctional enzyme subunit alpha, mitochondrial	HADHA	82.9	52	3	1	1	1	6.30e+05
P61163	Alpha-centractin	ACTR1A	42.6	52	4	1	1	1
Q14257	Reticulocalbin-2	RCN2	36.9	51	5	1	1	1	1.04e+06
P10809	60 kDa heat shock protein, mitochondrial	HSPD1	61	51	3	2	2	2	3.36e+06
P36578	60S ribosomal protein L4	RPL4	47.7	51	6	2	2	2	7.01e+06
P14678	Small nuclear ribonucleoprotein-associated proteins B and B'	SNRPB	24.6	51	3	1	1	1	1.06e+06
P00403	Cytochrome c oxidase subunit 2	MT-CO2	25.5	51	4	1	1	1	3.71e+06
Q07955	Serine/arginine-rich splicing factor 1	SRSF1	27.7	50	9	2	2	2	2.96e+06
P60468	Protein transport protein Sec61 subunit beta	SEC61B	10	50	16	1	1	1
P61353	60S ribosomal protein L27	RPL27	15.8	50	13	2	2	2	1.20e+07
Q8WXR4	Myosin-IIIb	MYO3B	151.7	50	1	1	1	1	1.37e+07
Q9BV86	N-terminal Xaa-Pro-Lys N-methyltransferase 1	NTMT1	25.4	50	3	1	1	1	5.73e+05
P08195	4F2 cell-surface antigen heavy chain	SLC3A2	68	49	2	1	1	1	1.39e+06
Q9UJC5	SH3 domain-binding glutamic acid-rich-like protein 2	SH3BGRL2	12.3	48	13	1	1	1	1.42e+06
O60812	Heterogeneous nuclear ribonucleoprotein C-like 1	HNRNPCL1	32.1	48	4	1	1	1	3.38e+06
O43684	Mitotic checkpoint protein BUB3	BUB3	37.1	47	2	1	1	1
P39019	40S ribosomal protein S19	RPS19	16.1	47	6	1	1	1	3.98e+06
Q5T9A4	ATPase family AAA domain-containing protein 3B	ATAD3B	72.5	46	1	1	1	1
Q13428	Treacle protein	TCOF1	152	46	1	1	1	1
Q02543	60S ribosomal protein L18a	RPL18A	20.7	46	7	1	1	1	2.80e+06
O95816	BAG family molecular chaperone regulator 2	BAG2	23.8	46	5	1	1	1	1.51e+06
P62910	60S ribosomal protein L32	RPL32	15.9	45	10	1	1	1	1.09e+06
P50402	Emerin	EMD	29	44	5	1	1	1	1.05e+06
P63096	Guanine nucleotide-binding protein G(i) subunit alpha-1	GNAI1	40.3	44	6	1	2	2	6.02e+05
P62854	40S ribosomal protein S26	RPS26	13	44	13	1	1	1	3.27e+06
P62424	60S ribosomal protein L7a	RPL7A	30	44	5	1	1	1
Q02978	Mitochondrial 2-oxoglutarate/malate carrier protein	SLC25A11	34	43	3	1	1	1	4.58e+05
Q16401	26S proteasome non-ATPase regulatory subunit 5	PSMD5	56.2	43	2	1	1	1
P62266	40S ribosomal protein S23	RPS23	15.8	43	8	1	1	1	4.78e+06
P16402	Histone H1.3	H1-3	22.3	43	5	1	1	1	7.90e+06
P13987	CD59 glycoprotein	CD59	14.2	43	9	1	1	1	2.14e+06
P61626	Lysozyme C	LYZ	16.5	42	5	1	1	1	8.96e+05
Q00325	Phosphate carrier protein, mitochondrial	SLC25A3	40.1	42	3	1	1	1	4.46e+06
P25705	ATP synthase subunit alpha, mitochondrial	ATP5F1A	59.7	41	1	1	1	1	2.24e+06
O75128	Protein cordon-bleu	COBL	135.5	41	1	1	1	1	9.90e+05
O15511	Actin-related protein 2/3 complex subunit 5	ARPC5	16.3	41	4	1	1	1	5.81e+06
P12273	Prolactin-inducible protein	PIP	16.6	41	8	1	1	1
Q9NQX4	Unconventional myosin-Vc	MYO5C	202.7	41	0	1	1	1	2.14e+06
Q96M89	Coiled-coil domain-containing protein 138	CCDC138	76.2	40	1	1	1	1	3.60e+06
P49792	E3 SUMO-protein ligase RanBP2	RANBP2	358	39	0	1	1	1	1.68e+07
P17980	26S proteasome regulatory subunit 6A	PSMC3	49.2	39	2	1	1	1	6.81e+05
O75955	Flotillin-1	FLOT1	47.3	39	4	1	1	1	1.63e+06
Q8WXE9	Stonin-2	STON2	101.1	39	1	1	1	1	2.19e+07
Q96CW1	AP-2 complex subunit mu	AP2M1	49.6	39	2	1	1	1	7.86e+05
P50991	T-complex protein 1 subunit delta	CCT4	57.9	38	2	1	1	1	8.83e+05
Q9NVI1	Fanconi anemia group I protein	FANCI	149.2	38	0	1	1	1	3.97e+07
P06396	Gelsolin	GSN	85.6	38	1	1	1	1	1.31e+06
P81605	Dermcidin	DCD	11.3	38	10	1	1	1	1.97e+06
P50914	60S ribosomal protein L14	RPL14	23.4	38	6	1	1	1	1.63e+06
P62906	60S ribosomal protein L10a	RPL10A	24.8	38	4	1	1	1	4.48e+06
Q8IYD1	Eukaryotic peptide chain release factor GTP-binding subunit ERF3B	GSPT2	68.8	37	3	1	1	1	1.40e+06
Q9C0A0	Contactin-associated protein-like 4	CNTNAP4	145.2	37	1	1	1	1	1.20e+07
P60866	40S ribosomal protein S20	RPS20	13.4	37	9	1	1	1	6.08e+06
Q14134	Tripartite motif-containing protein 29	TRIM29	65.8	37	1	1	1	1	2.51e+06
O60716	Catenin delta-1	CTNND1	108.1	37	1	1	1	1	1.33e+06
Q9Y265	RuvB-like 1	RUVBL1	50.2	36	4	1	1	1	3.37e+05
Q8NAB2	Kelch repeat and BTB domain-containing protein 3	KBTBD3	69.8	36	1	1	1	1	2.50e+06
P08243	Asparagine synthetase [glutamine-hydrolyzing]	ASNS	64.3	36	2	1	1	1	3.56e+05
P26599	Polypyrimidine tract-binding protein 1	PTBP1	59.6	36	4	1	1	1	7.84e+05
Q9UIV1	CCR4-NOT transcription complex subunit 7	CNOT7	32.7	36	4	1	1	1	5.56e+05
P46778	60S ribosomal protein L21	RPL21	18.6	36	9	1	1	1
Q96ET8	Golgi apparatus membrane protein TVP23 homolog C	TVP23C	31.1	35	3	1	1	1	2.54e+07
Q14204	Cytoplasmic dynein 1 heavy chain 1	DYNC1H1	532.1	35	0	1	1	1
P31327	Carbamoyl-phosphate synthase [ammonia], mitochondrial	CPS1	164.8	35	1	1	1	1	6.61e+05
P08708	40S ribosomal protein S17	RPS17	15.5	35	7	1	1	1	1.45e+06
Q9H361	Polyadenylate-binding protein 3	PABPC3	70	35	2	1	1	1	1.60e+06
Q8N0Z3	Spindle and centriole-associated protein 1	SPICE1	96.2	35	1	1	1	1	5.44e+06
O15427	Monocarboxylate transporter 4	SLC16A3	49.4	35	2	1	1	1	6.89e+05
Q14160	Protein scribble homolog	SCRIB	174.8	34	0	1	1	1	1.86e+06
P35241	Radixin	RDX	68.5	34	2	1	1	1	1.19e+06
Q96H55	Unconventional myosin-XIX	MYO19	109.1	34	1	1	1	1
P62851	40S ribosomal protein S25	RPS25	13.7	34	7	1	1	1	5.21e+06
O43293	Death-associated protein kinase 3	DAPK3	52.5	34	2	1	1	1	1.49e+06
Q14103	Heterogeneous nuclear ribonucleoprotein D0	HNRNPD	38.4	34	2	1	1	1	1.29e+06
P26639	Threonine--tRNA ligase 1, cytoplasmic	TARS1	83.4	34	1	1	1	1	5.55e+05
P51148	Ras-related protein Rab-5C	RAB5C	23.5	33	5	1	1	1	1.95e+06
P08865	40S ribosomal protein SA	RPSA	32.8	33	3	1	1	1	1.71e+06
P00338	L-lactate dehydrogenase A chain	LDHA	36.7	33	3	1	1	1	2.06e+06
P11766	Alcohol dehydrogenase class-3	ADH5	39.7	33	2	1	1	1	3.43e+06
Q13155	Aminoacyl tRNA synthase complex-interacting multifunctional protein 2	AIMP2	35.3	33	3	1	1	1	6.46e+05
O94989	Rho guanine nucleotide exchange factor 15	ARHGEF15	91.9	33	1	1	1	1	3.13e+07
P13073	Cytochrome c oxidase subunit 4 isoform 1, mitochondrial	COX4I1	19.6	32	6	1	1	1	1.88e+06
Q9NQH7	Xaa-Pro aminopeptidase 3	XPNPEP3	57	32	1	1	1	1	3.58e+06
P04004	Vitronectin	VTN	54.3	32	3	1	1	1
Q8NC51	Plasminogen activator inhibitor 1 RNA-binding protein	SERBP1	44.9	31	1	1	1	1	1.93e+06
P61619	Protein transport protein Sec61 subunit alpha isoform 1	SEC61A1	52.2	31	2	1	1	1	1.30e+06
Q15392	Delta(24)-sterol reductase	DHCR24	60.1	31	2	1	1	1	1.09e+06
P20594	Atrial natriuretic peptide receptor 2	NPR2	116.9	31	1	1	1	1	7.22e+06
Q9NR30	Nucleolar RNA helicase 2	DDX21	87.3	31	1	1	1	1	1.15e+06
P11586	C-1-tetrahydrofolate synthase, cytoplasmic	MTHFD1	101.5	31	1	1	1	1	4.62e+06
Q16576	Histone-binding protein RBBP7	RBBP7	47.8	31	2	1	1	1	9.10e+05
P27105	Stomatin	STOM	31.7	30	6	1	1	1	7.45e+05
P62277	40S ribosomal protein S13	RPS13	17.2	30	10	1	1	1	4.09e+06
O60656	UDP-glucuronosyltransferase 1A9	UGT1A9	59.9	30	1	1	1	1	5.83e+06
P21291	Cysteine and glycine-rich protein 1	CSRP1	20.6	29	8	1	1	1	2.62e+06
P18621	60S ribosomal protein L17	RPL17	21.4	29	9	1	1	1	1.98e+06
Q96AG4	Leucine-rich repeat-containing protein 59	LRRC59	34.9	29	4	1	1	1	1.72e+06
P32969	60S ribosomal protein L9	RPL9P9	21.9	29	5	1	1	1	2.61e+06
P06703	Protein S100-A6	S100A6	10.2	29	9	1	1	1	1.80e+06
Q9BY89	Uncharacterized protein KIAA1671	KIAA1671	196.6	28	1	1	1	1
P61106	Ras-related protein Rab-14	RAB14	23.9	28	4	1	1	1	6.77e+05
P05386	60S acidic ribosomal protein P1	RPLP1	11.5	28	14	1	1	1	3.94e+06
P06702	Protein S100-A9	S100A9	13.2	28	11	1	1	1
Q9H853	Putative tubulin-like protein alpha-4B	TUBA4B	27.5	28	5	1	1	1	1.91e+07
Q7Z5H4	Vomeronasal type-1 receptor 5	VN1R5	40.8	28	2	1	1	1	1.43e+07
P15880	40S ribosomal protein S2	RPS2	31.3	28	4	1	1	1	3.08e+06
P19022	Cadherin-2	CDH2	99.7	27	2	1	1	1
Q9NR12	PDZ and LIM domain protein 7	PDLIM7	49.8	27	2	1	1	1	9.35e+05
Q8N752	Casein kinase I isoform alpha-like	CSNK1A1L	39.1	27	3	1	1	1	8.99e+05
Q8IUD2	ELKS/Rab6-interacting/CAST family member 1	ERC1	128	27	1	1	1	1	7.98e+05
Q96N23	Cilia- and flagella-associated protein 54	CFAP54	351.7	27	0	1	1	1	3.43e+07
Q3T906	N-acetylglucosamine-1-phosphotransferase subunits alpha/beta	GNPTAB	143.5	26	0	1	1	1	1.55e+06
P25205	DNA replication licensing factor MCM3	MCM3	90.9	26	1	1	1	1
Q96HS1	Serine/threonine-protein phosphatase PGAM5, mitochondrial	PGAM5	32	26	4	1	1	1
P62829	60S ribosomal protein L23	RPL23	14.9	26	14	1	1	1	3.28e+06
P13725	Oncostatin-M	OSM	28.5	26	4	1	1	1	1.18e+07
Q9HD67	Unconventional myosin-X	MYO10	237.2	26	1	1	1	1	2.93e+05
P61224	Ras-related protein Rap-1b	RAP1B	20.8	25	5	1	1	1	1.27e+06
P01116	GTPase KRas	KRAS	21.6	25	6	1	1	1	1.56e+06
P84090	Enhancer of rudimentary homolog	ERH	12.3	25	6	1	1	1	2.44e+06
Q96JP2	Unconventional myosin-XVB	MYO15B	167	25	1	1	1	1	1.78e+06
Q8WUI4	Histone deacetylase 7	HDAC7	102.9	24	1	1	1	1	1.24e+07
Q92828	Coronin-2A	CORO2A	59.7	24	2	1	1	1	1.91e+06
P53007	Tricarboxylate transport protein, mitochondrial	SLC25A1	34	24	4	1	1	1	1.60e+06
P07741	Adenine phosphoribosyltransferase	APRT	19.6	24	4	1	1	1	2.76e+06
Q15293	Reticulocalbin-1	RCN1	38.9	23	2	1	1	1	2.00e+06
Q96CD2	Phosphopantothenoylcysteine decarboxylase	PPCDC	22.4	23	3	1	1	1	1.57e+06
P35221	Catenin alpha-1	CTNNA1	100	22	2	1	1	1	1.14e+06
Q5M9N0	Coiled-coil domain-containing protein 158	CCDC158	127.1	21	1	1	1	1	1.42e+07
Q9BUL8	Programmed cell death protein 10	PDCD10	24.7	20	6	1	1	1	1.58e+06

## Sheet: Peptides
Sequence	Modifications	# PSMs	Accession	Missed Cleavages	Theo. MH+ [Da]	Abundances	Charge	DeltaM [ppm]	RT [min]	Ions Score
ALINADELASDVAGAEALLDR		2	Q13813	0	2127.09	1.29e+07	2	0.58	26.96	175
GLVEPVDVVDNADGTQTVNYVPSR		2	P21333	0	2544.26	3.93e+07	2	1.24	19.87	164
IAQLEEELEEEQGNTELINDR		1	P35579	0	2472.17	9.26e+06	2	0.69	19.05	163
SVNVSLTQEELDSGLDELSVR		1	Q9Y2D5	0	2290.14	1.50e+06	2	2.9	22.46	160
KDLYANTVLSGGTTMYPGIADR		2	P60709; P63261	1	2343.16	8.69e+07	2	-0.03	18.65	158
QVQSLTCEVDALKGTNESLER	1xCarbamidomethyl [C7]	2	P08670	1	2377.17	5.05e+07	2	-0.34	16.78	157
LSASSLTMESFAFLWAGGR	1xOxidation [M8]	2	Q00839	0	2047	1.06e+06	2	-0.56	26.73	150
IPEISIQDMTAQVTSPSGK		1	P21333	0	2002.02	2.37e+06	2	3.12	21.34	150
LAASGEGGLQELSGHFENQK		2	Q16643	0	2072	4.83e+07	2	-0.41	15.67	148
NTTQNTGYSSGTQNANYPVR		1	Q12965	0	2172.99	3.70e+06	2	0.37	10.27	143
TIGGGDDSFNTFFSETGAGK		1	P0DPH7; Q6PEY2; Q71U36; P68363; Q9BQE3	0	2007.89	1.44e+07	2	-1.3	20.7	143
LFILSSSSGDFAATEFVYPAR		2	O95425	0	2278.14	2.72e+06	2	0.94	25.59	141
YLLSQSSPAPLTAAEEELR		1	Q12792	0	2075.07	1.08e+07	2	0.21	21.47	140
IDYANLTGISVSSLSDSLFVLHVQR		1	O00159	0	2734.44	4.32e+05	3	0.94	26.92	138
LSDDNTIGKEEIQQR		2	Q13813	1	1745.87	1.93e+07	2	-1.15	10.03	138
LEGVLAEVAQHYQDTLIR		2	P46940	0	2055.09	2.65e+07	2	1.68	22.7	136
NQALNTDNYGHDLASVQALQR		2	Q13813	0	2328.13	1.86e+07	2	0.38	16.04	136
SLNWSSFVDNTFAEEFTTQNQK		2	Q9UHB6	0	2593.18	1.57e+07	2	-0.66	26.02	134
LQVELDNVTGLLSQSDSK		1	P35579	0	1946.01	4.60e+07	2	-0.22	22.52	132
EALEAESAWCYLYGTGSVAGVYLPGSR	1xCarbamidomethyl [C10]	1	Q15149	0	2906.37	9.20e+05	3	-0.92	25.81	131
LPTPIAGLDNIILFLR		1	Q9UPQ0	0	1766.06		2	-0.23	27.53	129
EEIQSSISGVTAAYNR		1	P46940	0	1724.84	7.21e+06	2	0.67	15.57	129
VGSAADIPINISETDLSLLTATVVPPSGR		2	P21333	0	2893.55		2	0.97	27.11	128
LVSPGSANETSSILVESVTR		2	O75369	0	2046.07	2.09e+07	2	0.71	19.63	128
LQTASDESYKDPTNIQSK		1	Q13813	1	2024.98	1.77e+06	2	-0.42	10.06	128
TLLQGSGCLAGIYLEDTKEK	1xCarbamidomethyl [C8]	1	Q15149	1	2196.12	1.07e+07	3	1.95	19.34	128
NTGESASQLLDAETAER		1	Q92614	0	1791.84	4.72e+06	2	-0.56	15.03	127
IAEFTTNLTEEEEKSK		2	P35579	1	1868.91	3.92e+07	2	-1.36	14.11	127
LPSPTSPFSSLSQDQAATSK		1	Q8WWI1	0	2049.01	4.80e+06	2	-1.79	18.53	126
LQLQEQLQAETELCAEAEELR	1xCarbamidomethyl [C14]	2	P35579	0	2501.22	1.76e+07	2	0.48	21.74	123
AAAGELQEDSGLCVLAR	1xCarbamidomethyl [C13]	2	Q96C19	0	1759.86	1.72e+07	2	-0.08	17.87	122
YKDLDEDELLGNLSETELK		1	Q9NYL9	1	2224.09	1.03e+07	2	0.11	19.97	120
VIESTQDLGNDLAGVMALQR	1xOxidation [M16]	1	Q01082	0	2146.08	6.31e+06	2	2.05	19.52	120
AEVVETTQVYTEEETR		1	Q15149	0	1883.89	2.97e+06	2	2.07	13.51	119
EKLCYVALDFEQEMATAASSSSLEK	1xCarbamidomethyl [C4]; 1xOxidation [M14]	3	P60709; Q6S8J3; P63261	1	2823.31	1.66e+08	2	-0.21	19.2	119
SPSDSSTASTPVAEQIER		1	Q16643	0	1861.88	1.94e+07	2	-0.01	12.54	119
TQLASWSDPTEETGPVAGILDTETLEK		2	Q15149	0	2888.4	1.37e+07	2	1.72	23.95	119
KLEGDSTDLSDQIAELQAQIAELK		4	P35579	1	2615.34	7.63e+07	2	-1	25.42	119
SMEAEMIQLQEELAAAER	1xOxidation [M]	4	P35579	0	2064.96	2.29e+07	2	0.68	20.2	119
GLVSSDELAKDVTGAEALLER		1	Q13813	1	2173.13	7.13e+06	3	0.68	23.15	118
SQFFEQGSSDSVVPDLPVPTISAPSR		1	Q8WWI1	0	2747.35	1.19e+06	2	3.14	24.45	118
SGVEVLFNELEIPVEEYSFGR		1	O43795	0	2413.19		2	1.22	27.15	117
FLEVQYLTGGLIEPDTPGR		2	Q15149	0	2105.09	9.99e+06	2	0.24	24.9	117
AYSDPSTGEPATYGELQQR		2	Q15149	0	2069.94	1.57e+07	2	-0.51	13.23	117
GFFDPNTEENLTYLQLMER		2	Q15149	0	2317.08	4.37e+06	2	0.78	25.38	116
IPEISIQDMTAQVTSPSGK	1xOxidation [M9]	1	P21333	0	2018.01	1.06e+07	2	0.05	17.19	116
IGNLQTDLSDGLR		1	O75369	0	1401.73	9.09e+06	2	1.11	17.35	115
KMQQNIQELEEQLEEEESAR		1	P35579	1	2461.15		2	0.32	18.77	115
YVLINWVGEDVPDAR		2	Q16643	0	1745.89	3.65e+07	2	1.16	22.89	115
FLEFQYLTGGLVDPEVHGR		1	P15924	0	2177.1	4.86e+06	3	1.51	24.03	115
KDLYANTVLSGGTTMYPGIADR	1xOxidation [M15]	4	P60709; P63261	1	2359.16	5.51e+08	2	-1.5	17.02	114
LVSQDNFGLELAAVEAAVR		1	O15020	0	2002.06	9.79e+05	2	3.77	26.05	114
KISENSYSLDDLEIGPGQLSSSTFDSEKNESR		2	Q9UHB6	2	3532.66	5.68e+06	3	0.67	19.06	113
DLYANTVLSGGTTMYPGIADR	1xOxidation [M14]	19	P60709; P63261	0	2231.06	1.05e+09	2	1.26	29.12	113
MEDSVGCLETAEEVKR	1xCarbamidomethyl [C7]	2	P35579	1	1852.84	1.15e+07	2	-2.6	13.14	113
VTPNPDLLDLVQTADEK		1	Q8N3V7	0	1867.96	2.77e+06	2	-0.05	22.9	112
KLEEEQIILEDQNCK	1xCarbamidomethyl [C14]	1	P35579	1	1888.93	1.27e+07	2	-0.14	13.86	112
DFSALESQLQDTQELLQEENR		4	P35579	0	2493.17	1.13e+08	2	0.75	24.94	112
HSQAVEELAEQLEQTKR		4	P35579	1	1996.01	1.30e+08	2	1.12	15.95	112
GIEQAVQSHAVAEEEAR		2	Q16891	0	1823.89	1.69e+07	2	-3.81	12.14	112
AHIANPSGASTECFVTDNADGTYQVEYTPFEK	1xCarbamidomethyl [C13]	1	O75369	0	3519.56	2.58e+06	3	-2.97	18.49	112
CVACECDLGGSSSGAEVR	3xCarbamidomethyl [C1; C4; C6]	1	Q8WWI1	0	1913.78	1.28e+06	2	-0.64	11.08	111
GFFDPNTHENLTYLQLLER		2	P58107; Q15149	0	2307.14	3.44e+07	2	-7.09	23.78	110
VNNSSLIGVGYTQTLRPGVK		2	P45880	1	2103.16	1.22e+07	2	-0.29	16.87	109
VANPSGNLTETYVQDR		1	P21333	0	1763.86	4.34e+07	2	-0.2	13.72	109
ISDALLQLTCVSCVR	2xCarbamidomethyl [C10; C13]	1	Q27J81	0	1734.89	5.71e+06	2	2.13	22.11	109
NMDPLNDNIATLLHQSSDK	1xOxidation [M2]	2	P35579	0	2142.01	3.31e+07	2	-0.43	19.55	109
VASNPYTWFTMEALEETWR	1xOxidation [M11]	2	Q13813	0	2347.07	4.78e+06	2	-0.25	26.83	109
EMEENFAVEAANYQDTIGR		2	P08670	0	2186.97	4.28e+07	2	-0.12	18.83	109
KQELEEICHDLEAR	1xCarbamidomethyl [C8]	3	P35579	1	1769.85	1.29e+08	2	-1.03	13.71	108
IAAESSENVDCPENPK	1xCarbamidomethyl [C11]	1	Q32MZ4	0	1759.78		2	-0.76	9.31	108
DLYANTVLSGGTTMYPGIADR		4	P60709; P63261	0	2215.07	1.27e+08	2	0.4	21.94	108
IEGYEDQVLITEHGDLGNSR		2	P52907	0	2245.07	2.61e+07	2	-0.25	16.22	108
ATTAALLLEAQAATGFLVDPVR		1	Q15149	0	2228.23		2	0.57	27.17	108
AGTLSITEFADMLSGNAGGFR		2	Q15149	0	2115.02	2.95e+06	2	-0.19	27.04	107
DGFIDKEDLHDMLASLGK		3	P24844; O14950; P19105	1	2003.97	1.20e+07	2	1.05	22.11	107
SADESGQALLAAGHYASDEVR		2	Q13813	0	2147	5.01e+07	2	2.2	15.71	107
SMEAEMIQLQEELAAAER	2xOxidation [M2; M6]	2	P35579	0	2080.95	2.27e+07	2	-4.51	18.44	107
WNTDNTLGTEIAIEDQICQGLK	1xCarbamidomethyl [C18]	1	P45880	0	2519.21	1.55e+06	2	-0.46	23.52	107
LTEMETLQSQLMAEK	1xOxidation [M]	2	P35579	0	1767.85	3.00e+07	2	0.53	16.26	107
SYELPDGQVITIGNER		23	A5A3E0; P63267; Q9BYX7; P60709; Q6S8J3; P62736; P68133; Q562R1; P68032; P63261	0	1790.89	1.88e+09	2	-0.01	29.97	107
ETTDTDTADQVIASFK		1	O43707	0	1741.81	6.01e+06	2	0.14	18.69	107
EAALTSEEVGADLEQVEVLQK		2	Q13813	0	2258.14	1.77e+07	2	-0.48	21.14	107
SQNIVTDSSSLSAEAIR		2	Q01082	0	1777.89	2.61e+07	2	0.4	16.11	107
MQQNIQELEEQLEEEESAR		2	P35579	0	2333.06	2.57e+07	2	-0.19	20.3	106
AALAHSEEVTASQVAATK		1	Q15149	0	1783.92	9.89e+06	2	-1.83	10.76	106
GDVVLQSDHVIETLTK		2	O00159	0	1753.93	2.86e+07	2	1.17	18.23	106
LLLEAQAATGFLLDPVK		1	Q15149	0	1799.03	1.57e+06	2	6.85	26.33	106
HFIQDTCLYECSPNLGPWIQQVDQSWR	2xCarbamidomethyl [C7; C11]	1	P15328	0	3377.55	7.32e+06	3	0.31	24.41	106
FNEEHIPDSPFVVPVASPSGDAR		2	P21333	0	2467.19	6.09e+07	2	-0.32	20.43	105
EQELQQTLQQEQSVLDQLR		2	Q15149	0	2313.17	1.26e+07	2	2.18	21.86	105
DALDGPAAEAEPEHSFDGLR		2	Q15149	0	2096.95	2.15e+07	2	0.35	16.4	105
LQQLFNHTMFILEQEEYQR	1xOxidation [M9]	1	P35580; P35749; P35579	0	2483.2	7.78e+07	3	1.4	19.58	104
MSVQPTVSLGGFEITPPVVLR	1xOxidation [M1]	2	P06748	0	2243.21	7.63e+06	2	0.47	26.31	104
SSLSSAQADFNQLAELDR		1	Q13813	0	1951.94	1.49e+07	2	0.76	20.13	104
SPFVVQVGEACNPNACR	2xCarbamidomethyl [C11; C16]	2	O75369	0	1904.87	4.85e+06	2	0.07	16.73	104
VTWDSSFCAVNPR	1xCarbamidomethyl [C8]	1	Q9ULV4	0	1538.71	1.31e+07	2	-1.6	17.51	104
ELDDATEANEGLSR		1	P35580	0	1519.69	1.86e+06	2	1.92	11.18	104
DFLDGVYAFEYYPSTPGR		1	O75369	0	2096.96	8.53e+05	2	-3.49	25.5	103
ASAFNSWFENAEEDLTDPVR		2	Q13813	0	2298.03	6.86e+06	2	0.27	25.16	103
DALLSALSIQNYHLECNETK	1xCarbamidomethyl [C16]	2	Q01082	0	2319.13	1.17e+07	2	-0.66	21.5	103
FDGALNVDLTEFQTNLVPYPR		2	P0DPH7; Q6PEY2; Q71U36; Q9NY65; P68363; Q9BQE3; P68366	0	2409.21		2	-1.2	26.16	102
VEDMAELTCLNEASVLHNLK	1xCarbamidomethyl [C9]; 1xOxidation [M4]	2	P35580; P35579	0	2302.11	8.43e+07	2	-0.25	19.15	102
KHEAIETDIAAYEER		1	Q01082	1	1774.86	6.05e+06	2	0.08	12.4	102
IIGLDQVAGMSETALPGAFK		2	P35579	0	2018.06	2.31e+07	2	0.6	24.75	102
IPEINSSDMSAHVTSPSGR	1xOxidation [M9]	1	O75369	0	2000.93	6.53e+06	3	0.11	11.5	101
LCYVALDFEQEMATAASSSSLEK	1xCarbamidomethyl [C2]; 1xOxidation [M12]	13	P60709; Q6S8J3; P63261	0	2566.17	4.63e+08	2	-3.14	21.13	101
YMIGVTYGGDDIPLSPYR		1	O75369	0	2016.97	1.08e+06	2	0.07	22.42	101
LVSQDNFGFDLPAVEAATK		2	Q01082	0	2022.02	2.18e+07	2	2.25	23.28	101
ALAQEDQGAGEVER		1	O15020	0	1472.7	1.58e+06	2	0.9	9.15	101
FSSSIENSDSPVR		1	O95425	0	1424.67	3.99e+06	2	0	12.06	101
FRCPEALFQPSFLGMESCGIHETTFNSIMK	2xCarbamidomethyl [C3; C18]	2	P60709; P63261	1	3534.63	9.04e+07	3	0.94	23.35	101
VLAGDKNFITAEELR		1	O43707	1	1675.9		2	-0.33	16.45	101
STAGDTHLGGEDFDNR		2	P54652; P11142	0	1691.73	8.68e+06	2	-0.11	10.26	101
ISELTSELTDER		1	Q92614	0	1392.69	8.20e+06	2	-0.21	15.19	101
QETFDAGLQAFQQEGIANITALK		2	Q13813	0	2493.26	7.35e+06	2	1.28	24.72	101
THEAEIVEGENHTYCIR	1xCarbamidomethyl [C15]	3	P21333	0	2057.93	2.83e+07	2	-0.08	11.24	100
TTGIVMDSGDGVTHTVPIYEGYALPHAILR		10	P60709; P63261	0	3183.61	1.04e+09	2	-0.92	21.64	100
GVSFYEVPPHLFAVADTVYR		2	O00159	0	2267.15	5.96e+07	2	0.72	24.01	100
IINEPTAAAIAYGLDK		1	P54652; P11142; P11021; P34931	0	1659.9	8.77e+06	2	0.57	19.85	100
ETNLDSLPLVDTHSKR		3	P08670	1	1824.95	1.25e+07	2	0.26	15.37	100
AEDGSVIDYELIDQDAR		1	P07355	0	1908.88	4.35e+06	2	-0.97	19.31	100
EMEENFAVEAANYQDTIGR	1xOxidation [M2]	2	P08670	0	2202.96	1.54e+08	2	-0.14	17.68	100
MLDAEDIVNTARPDEK	1xOxidation [M1]	1	O43707	1	1832.87	3.70e+06	2	-0.75	15.17	99
LAPPLVTLLSGEPEVQYVALR		1	P63010	0	2265.29	9.00e+05	3	0.39	27.19	99
VFDKDGNGYISAAELR		2	P0DP23	1	1754.87	1.82e+07	2	0.2	15.31	99
DETVSDCSPHIANIGR	1xCarbamidomethyl [C7]	1	P47756	0	1770.81	2.88e+06	2	-0.27	13.04	99
CAPGVVGPAEADIDFDIIR	1xCarbamidomethyl [C1]	2	P21333	0	2014.99	7.28e+06	2	-0.41	23.57	99
LQVEPAVDTSGVQCYGPGIEGQGVFR	1xCarbamidomethyl [C14]	2	P21333	0	2763.34	2.42e+07	2	-0.01	20.53	99
QEFAQHANAFHQWIQETR		1	Q13813	0	2241.06	7.17e+06	3	-0.02	15.06	99
YMIGVTYGGDDIPLSPYR	1xOxidation [M2]	1	O75369	0	2032.97	6.52e+06	2	-0.85	21.18	99
QNLLSQSHAYQQFLR		1	Q01082	0	1832.94	4.68e+06	2	-1.58	17.19	98
KIQALQQQADEAEDR		2	P67936	1	1742.87	9.53e+06	2	-1.06	9.47	98
VHSPSGALEECYVTEIDQDKYAVR	1xCarbamidomethyl [C11]	2	P21333	1	2766.3	2.14e+07	3	-1	16.09	98
VDINTEDLEDGTCR	1xCarbamidomethyl [C13]	2	P21333	0	1636.71	2.01e+07	2	-0.56	14.16	98
ALEQQVEEMKTQLEELEDELQATEDAK		1	P35579	1	3147.49		3	0.8	26.88	98
EIEELQSQAQALSQEGK		1	Q01082	0	1887.93	6.41e+06	2	-1.78	15.25	98
TLVTQNSGVEALIHAILR		1	P14923	0	1935.1	2.66e+06	3	0.83	26.93	98
LCYVALDFEQEMATAASSSSLEK	1xCarbamidomethyl [C2]	14	P60709; Q6S8J3; P63261	0	2550.17	2.80e+08	2	0.5	24.57	98
GFFDPNTEENLTYLQLK		1	P15924	0	2028.99	3.66e+06	2	2.09	23.47	97
LGDLQADSEESQR		1	Q92614	0	1447.67	3.01e+06	2	-1.01	10.16	97
EAEKLESEHPDQAQAILSR		2	Q01082	1	2151.07	1.43e+07	2	-0.78	11.94	97
HQAFEAELHANADR		2	Q13813	0	1608.75	2.81e+07	2	-0.73	10.03	97
TEMEDLMSSKDDVGK	1xOxidation [M7]	2	P35579	1	1700.74	6.85e+06	2	0.03	9.99	97
RQDLEDSLQAQQYFADANEAESWMR	1xOxidation [M24]	1	Q13813	1	3017.33	8.17e+06	3	-1.79	19.3	97
SNQQLENDLNLMDIK	1xOxidation [M12]	1	P46940	0	1790.86	5.50e+06	2	0.22	17.43	97
VLETAEDIQER		1	Q13813	0	1302.65	4.24e+07	2	0.77	11.61	97
KMEDSVGCLETAEEVKR	1xCarbamidomethyl [C8]; 1xOxidation [M2]	2	P35579	2	1996.93	1.14e+07	2	-1.88	10.61	97
LAALNPESNTAGLDIFAK		1	O00299	0	1844.98	2.21e+06	2	0.4	22.22	97
ATSNVFAMFDQSQIQEFK		2	P24844; O14950; P19105	0	2090.99	1.03e+07	2	0.7	23.95	96
KVIQYLAYVASSHK		3	P35579	1	1606.9	4.58e+07	2	0.02	15.34	96
IINEPTAAAIAYGLDR		1	P17066; P0DMV8	0	1687.9	8.34e+06	2	0.25	20.3	96
ATSNVFAMFDQSQIQEFK	1xOxidation [M8]	1	P24844; O14950; P19105	0	2106.98	3.42e+07	2	1.02	21.09	96
LGDLYEEEMR		1	P08670	0	1254.57	7.75e+07	2	0.18	14.81	96
LIQNNHYAMEDVATR	1xOxidation [M9]	2	Q13813	0	1790.85	9.97e+06	2	-0.18	9.68	96
TTGIVMDSGDGVTHTVPIYEGYALPHAILR	1xOxidation [M6]	24	P60709; P63261	0	3199.61	3.05e+09	4	-0.06	28.06	96
IASGLGLAWIVGR		1	O14880	0	1312.77	2.15e+07	2	0.02	24.9	96
KIEDLGAAMEEALILDNK	1xOxidation [M9]	2	Q13813	1	1989.02	1.28e+07	2	-1.09	18.41	95
KVESLQEEIAFLKK		3	P08670	2	1661.95	1.60e+08	2	0.04	16.86	95
FALGIFAINEAVESGDVGK		2	P46940	0	1937	1.05e+07	2	1.28	26.33	95
GYAFNHSADFETVR		2	P61160	0	1613.73	1.56e+07	2	0.23	13.89	95
MEDSVGCLETAEEVK	1xCarbamidomethyl [C7]; 1xOxidation [M1]	1	P35579	0	1712.74	4.55e+06	2	-0.18	13.79	95
LDENSAFLQFNWK		1	Q13813	0	1611.78	8.91e+06	2	-0.07	22.7	95
APTASADAELSAQLSR		1	Q9BUP0	0	1587.8	7.26e+06	2	0.31	14.6	95
MAPYQGPDAVPGALDYK	1xOxidation [M1]	1	O43707	0	1808.85	7.39e+06	2	-0.62	16.78	95
ATCAPQHGAPGPGPADASK	1xCarbamidomethyl [C3]	2	P21333	0	1789.83	1.17e+07	2	-0.52	7.39	94
IAWPPPTELGSSGSALEEGIK		2	Q9UHB6	0	2139.1	4.56e+07	2	-0.62	21.63	94
VDGAEWGVDLPSVEAQLGSHR		2	Q15149	0	2222.08	1.40e+07	2	1.72	21.11	94
AIFLADGNVFTTGFSR		2	Q9ULV4	0	1715.88	2.10e+07	2	0.87	23.99	94
TVTIWEIINSEYFTAEQR		2	Q15149	0	2200.09	6.24e+06	2	0.45	27.07	94
KMEDSVGCLETAEEVK	1xCarbamidomethyl [C8]; 1xOxidation [M2]	2	P35579	1	1840.83	6.70e+06	2	0.5	11.94	94
TAAFLLPILSQIYSDGPGEALR		2	O00571	0	2332.25		2	1.87	27.38	94
ISANENSLAVR		1	Q9UHB6	0	1173.62	5.84e+07	2	0.32	11.49	93
CVEDPETGLCLLPLTDK	2xCarbamidomethyl [C1; C10]	2	Q15149	0	1959.94	9.18e+06	2	1.02	22.96	93
LTEEETVCLDLDKVEAYR	1xCarbamidomethyl [C8]	1	P15924	1	2183.05	2.50e+06	3	0.86	19	93
TFTDCFNCLPIAAIVDEK	2xCarbamidomethyl [C5; C8]	1	P62136; P36873; P62140	0	2113.99	7.89e+06	2	-0.04	26.28	93
YWPQEAGEYAVHVLCNSEDIR	1xCarbamidomethyl [C15]	2	P21333	0	2536.16	4.35e+07	2	-2.44	21.64	93
ANLQIDQINTDLNLER		2	P35579	0	1869.97	7.10e+07	2	1.11	19.84	93
VDTVNHLADELINSGHSDAATIAEWK		2	Q01082	0	2806.36	1.10e+07	3	0.55	21.23	93
DLLPSDMAVALLEAQAGTGHIIDPATSAR		1	Q15149	0	2933.5	6.86e+06	3	0.64	27.03	93
IAEFTTNLTEEEEK		2	P35579	0	1653.79	1.33e+08	2	0.11	15.9	92
KTTDTASVQNEAK		1	Q9ULV4	1	1392.7		2	0.05	6.59	92
MAVTFIGNSTAIQELFK	1xOxidation [M1]	1	P07437	0	1885.97	5.86e+06	2	-0.38	25.18	92
LKDVLLQVDDER		2	P35579	1	1442.78	1.29e+07	2	0.95	15.62	92
HSQAVEELAEQLEQTK		2	P35579	0	1839.91	3.84e+07	2	-0.22	17.35	92
EAFSLFDKDGDGTITTK		4	P0DP23	1	1844.89	6.45e+07	2	-0.38	17.97	92
NQVAMNPTNTVFDAK	1xOxidation [M5]	1	P11142	0	1665.79	6.29e+06	2	-0.23	13.89	92
LQQELDDLLVDLDHQR		3	P35579	0	1949.99	1.66e+08	3	1.29	22.45	92
TEAVASSLYDILAR		1	P16278	0	1508.8	4.68e+06	2	-1.56	23.37	92
SINPDEAVAYGAAVQAAILSGDK		2	P11142	0	2260.15	6.06e+06	2	0.43	25.08	92
LLANQQVFHISCFR	1xCarbamidomethyl [C12]	2	Q9UHB6	0	1732.9	5.42e+07	2	0.57	18.52	92
TVTVWELISSEYFTAEQR		1	Q15149	0	2159.07	2.83e+06	2	-0.36	27.1	92
LLEAQACTGGIIDPSTGER	1xCarbamidomethyl [C7]	2	Q15149	0	1987.98	8.94e+06	2	2.18	16.83	92
GWSMSEQSEESVGGR	1xOxidation [M4]	1	Q9UHB6	0	1641.68	9.97e+06	2	-0.14	9.8	92
LSLEGDHSTPPSAYGSVK		1	A6NMY6; P07355	0	1844.9	6.13e+06	2	-3.49	13.1	92
NVESTNSNAYTQR		1	Q86V48	0	1483.68	1.11e+06	2	-1.4	7.79	91
YSTSGSSGLTTGK		1	Q16891	0	1245.6	6.58e+06	2	-0.58	8.54	91
LEESLEYQQFVANVEEEEAWINEK		1	Q13813	0	2926.36	3.95e+06	3	-1.27	25.47	91
DGHNLISLLEVLSGDSLPR		2	Q15149	0	2035.08	4.62e+06	2	0.18	27.28	91
FFALVNALDEHLFPVR		1	Q96N67	0	1888.01	1.47e+07	3	-0.17	26.8	91
AQLADSFHLQQFFR		2	Q13813	0	1707.86	3.32e+07	2	0.07	21.6	91
ISIEMHGTLEDQLSHLR	1xOxidation [M5]	2	P12814	0	1995	1.13e+07	3	-1.15	16.6	91
EIVSGLLAAVSSSK		1	P28290	0	1360.77	2.42e+06	2	-0.89	21.98	91
LLHYAGEVTYSVTGFLDK		2	O00159	0	2013.03	2.67e+07	2	3.03	20.74	90
IAALQAFADQLIAAGHYAK		2	Q13813	0	1972.07	7.51e+07	2	0.39	25.12	90
ALEQQVEEMKTQLEELEDELQATEDAK	1xOxidation [M9]	2	P35579	1	3163.48	1.82e+07	3	0.24	22.11	90
EILGTAQSVGCNVDGR	1xCarbamidomethyl [C11]	1	P30050	0	1675.81	2.23e+06	2	-0.8	13.98	90
TELEDTLDSTAAQQELR		2	P35579	0	1919.92	7.42e+06	2	-0.26	16.62	90
LNDGNEYLFQAK		1	Q01082	0	1411.69	1.92e+07	2	-0.86	15.76	90
SIITYVSSLYDAMPR		2	Q15149	0	1715.87	2.20e+06	2	1.75	26.19	90
DAGEGLLAVQITDPEGKPK		2	P21333	1	1938.02	9.17e+06	2	-0.43	18.7	90
HEVEKSEISENTDASGK		1	Q9UHB6	1	1859.86	6.03e+06	3	0.19	6.75	89
IQALQQQADEAEDR		1	P67936	0	1614.77	8.81e+06	2	0.06	10.78	89
VTTEIQLPSQSPVEEQSPASLSSLR		1	Q8WWI1	0	2683.38		2	1.27	20.32	89
SMSDVSAEDVQNLR	1xOxidation [M2]	1	Q8WWI1	0	1566.71	1.13e+07	2	0.81	12.22	89
SEISENTDASGKIEK		2	Q9UHB6	1	1607.78	4.18e+06	2	0.78	8.4	89
KMQQNIQELEEQLEEEESAR	1xOxidation [M2]	1	P35579	1	2477.15	7.45e+06	3	1.3	17.48	89
AKEDIVTEQIDFSAAR		1	Q9Y2D5	1	1792.91	2.79e+06	2	0.11	16.14	89
WDVDDWDNENSSAR		1	Q01082	0	1708.68	1.93e+06	2	-0.06	16.65	89
VQSGSESVIQEYVDLR		1	Q15149	0	1808.9	1.80e+07	2	0.62	20.1	89
KGWSMSEQSEESVGGR	1xOxidation [M5]	2	Q9UHB6	1	1769.78	4.51e+06	2	-0.12	8.5	89
TIAECLADELINAAK	1xCarbamidomethyl [C5]	2	P46782	0	1631.83	5.61e+06	2	-0.77	24.95	89
LLLNNDNLLR		1	P47755; P52907	0	1197.7	1.36e+08	2	5.2	19.18	89
MSSNSNFSEVTLAGLASK	1xOxidation [M1]	1	O95425	0	1858.89		2	-0.76	19.13	88
FLEGTSCIAGVFVDATK	1xCarbamidomethyl [C7]	1	Q15149	0	1814.9	2.25e+06	2	-1.6	23.1	88
NTDQASMPDNTAAQK		1	P35749; P35579	0	1591.7	4.31e+06	2	-1.82	8.21	88
ITLQDVVSHSK		2	P46940	0	1226.67	2.48e+07	2	0.16	15.26	88
AQTLPTSVVTITSESSPGKR		2	Q01082	1	2059.1	1.89e+07	2	0.52	16.37	88
ADLEEQLSDEEKVR	1xAcetyl [N-Term]	1	P47755	1	1702.81	1.52e+07	2	2.6	17.44	88
GHYTEGAELVDSVLDVVR		1	Q13885; Q13509; P07437; P68371; Q9BVA1	0	1958.98	2.26e+07	3	-0.63	23.51	88
YLQDLLAWVEENQHR		2	Q15149	0	1913.95	2.87e+07	2	1.17	24.72	87
CAVGAACQPFHFYFPTPTVLCNEIWTHSYK	3xCarbamidomethyl [C1; C7; C21]	2	P15328	0	3601.65	9.91e+06	4	4.09	25.14	87
LEEAEKAADESER		2	P67936; P09493; P07951; P06753	1	1476.68	1.01e+07	2	0.62	7.03	87
YLTESYGTGQDIDDR		1	Q9UM54	0	1732.77	4.04e+06	2	-0.92	13	87
SEEMQTVQQEQLLQETQALQQSFLSEK	1xOxidation [M4]	1	Q15149	0	3196.53	6.75e+06	3	-1.94	24.23	87
TSTTGVATTQSPTPR		1	Q8WWI1	0	1504.76	1.06e+07	2	-0.57	8.91	87
NFILDQTNVSAAAQR		1	Q00839	0	1647.84	3.67e+06	2	1.7	17.38	87
SQIFSTASDNQPTVTIK		1	P11021	0	1836.93	3.68e+06	2	-0.87	16.46	87
NKDQGTYEDYVEGLR		2	P60660	1	1786.82	7.86e+07	2	-1.69	14.57	87
LTVSSLQESGLK		1	P21333	0	1261.7	3.18e+07	2	1.6	15.33	87
SSGPTSLFAVTVAPPGAR		1	Q00839	0	1714.91	4.64e+06	2	-0.27	21.75	86
LLESPGVEAGEGEAEKEEAGAQGR		1	Q6NYC8	1	2413.15	5.01e+06	3	-0.49	12.49	86
GNAMVEEGHFAAEDVK	1xOxidation [M4]	2	Q13813	0	1719.76	1.91e+07	2	0.67	10.7	86
DLNSQADSLMTSSAFDTSQVK	1xOxidation [M10]	2	Q13813	0	2261.02	2.28e+06	2	-1.22	16.65	86
AIEPPPLDAVIEAEHTLR		1	Q08211	0	1971.05	1.92e+06	3	0.45	23.26	86
SEQEEYEAEGIAWEPVQYFNNK		1	O00159	0	2660.18		2	0.38	22.08	86
RAEDGSVIDYELIDQDAR		1	P07355	1	2064.98	2.80e+06	2	-0.26	17.38	86
VDNDENEHQLSLR		1	P06748	0	1568.73	1.70e+06	2	-0.95	10.18	86
VAQPTITDNKDGTVTVR		2	P21333	1	1814.96	9.61e+06	2	-0.03	11.51	86
SRPFTVAASFQSTSVK		2	Q9UHB6	1	1712.9	4.75e+07	2	0.31	14.98	85
MHTTFEHDIQALGTQVR	1xOxidation [M1]	2	Q01082	0	1999.97	1.23e+07	2	-0.39	14.65	85
VVIVDPETGKEMSVYEAYR	1xOxidation [M12]	2	Q15149	1	2201.08	1.35e+07	2	-0.47	15.92	85
LSGSNPYTTVTPQIINSK		1	O43707	0	1920.01	5.43e+06	2	-1.61	17.43	85
SHQTGIQASEDVK	1xAcetyl [N-Term]	1	Q12792	0	1441.69	1.09e+07	2	0.55	9.43	85
ILPVFDEPPNPTNVEESLKR		3	Q9NYL9	1	2294.2	8.40e+07	2	-0.43	20.97	85
GAGSYTIMVLFADQATPTSPIR		1	P21333	0	2296.16	1.28e+06	3	-1.13	26.16	85
CIQMWFDPAQGNPNEEVAR	1xCarbamidomethyl [C1]	1	P15328	0	2262.01		2	-2.16	21.33	85
GVDDLDFFIGDEAIEKPTYATK		2	P61158	1	2444.19	8.70e+06	2	1.52	22.71	84
SVGGSGGGSFGDNLVTR		1	P02545	0	1566.75	1.62e+06	2	-0.87	14.44	84
VTMQNLNDR	1xOxidation [M3]	1	P02533; Q7Z3Y7; P13645; Q7Z3Y9; Q7Z3Z0; Q7Z3Y8; P08779	0	1106.53	1.78e+07	2	0.81	7.07	84
KHALLEADVAAHQDR		3	Q13813	1	1673.87	5.65e+06	2	-2.5	9.09	84
NIILEEGKEILVGDVGQTVDDPYATFVK		1	P23528	1	3062.59	4.70e+06	3	1.4	24.23	84
ELEAENYHDIKR		1	Q01082	1	1516.74		2	1.7	8.88	84
ANCSDNEFTQALTAAIPPESLTR	1xCarbamidomethyl [C3]	1	Q16891	0	2506.19	9.47e+05	2	-1.29	23.31	84
KMEDSVGCLETAEEVKR	1xCarbamidomethyl [C8]	2	P35579	2	1980.94	6.08e+06	3	-1.82	11.74	84
ASVLDTSMSAGSGSPSK	1xOxidation [M8]	1	Q9UPQ0	0	1597.74	1.91e+06	2	-2.85	10.09	84
ATLSSTSGLDLMSESGEGEISPQR	1xOxidation [M12]	1	Q8WWI1	0	2468.15	2.74e+06	3	-1.38	16.43	84
LFIGGLSFETTEESLR		1	P22626	0	1798.92	4.07e+06	2	0.01	23.99	84
LREDENAEPVGTTYQK		2	Q16643	1	1849.89	2.89e+07	2	-0.74	9.23	84
TQTAIASEDMPNTLTEAEK		1	Q01082	0	2049.96	1.63e+06	2	-0.16	15.89	84
LPSSPVYEDAASFK		1	Q14247	0	1510.74	1.08e+07	2	-0.11	16.9	84
GEELLSPLNLEQAAYAR		2	O00159	0	1873.97	4.14e+07	3	0.3	22.65	84
TTTTNTQVEGDDEAAFLER		1	Q05682	0	2097.96	2.68e+06	2	-1.29	15.76	83
ASGPGLNTTGVPASLPVEFTIDAK		2	P21333	0	2342.22	2.96e+07	2	0.57	23.93	83
IAGAGLLFVGGGIGGTILYAK		1	Q16891	0	1948.13		2	-0.05	26.94	83
TPGPGAQSALR		1	P62263	0	1054.56	5.56e+06	2	0.26	9.49	83
GNLEVLLFTIQSK		2	Q01082; O15020	0	1461.83	1.78e+07	2	1.3	25.34	83
HIVLSGGSTMYPGLPSR	1xOxidation [M10]	2	P61160	0	1787.91	8.12e+06	2	-0.79	15.21	83
LKQSAEEQAQAR		2	Q15149	1	1358.7	5.11e+06	2	0.13	6.44	83
AHEPTYFTVDCAEAGQGDVSIGIK	1xCarbamidomethyl [C11]	1	P21333	0	2565.19	1.49e+07	3	0.72	18.07	83
IVEAAENEYQTAISENYQTMSDTTFK	1xOxidation [M20]	1	P47755	0	2999.35	4.89e+06	3	-2.25	17.25	83
LISWYDNEFGYSNR		1	P04406	0	1763.8	6.64e+06	2	-0.81	20.41	83
EGPYSISVLYGDEEVPR		2	P21333	0	1909.92	3.90e+07	2	0.43	20.47	82
EEAENTLQSFR		1	P08670	0	1323.62	3.65e+08	2	-0.04	13.19	82
IISNASCTTNCLAPLAK	2xCarbamidomethyl [C7; C11]	1	P04406	0	1833.92	6.16e+06	2	0.13	16.04	82
PIYGGWLLLAPDGTDFDNPVHR		1	Q6WCQ1	0	2453.22	2.82e+06	3	-2.21	25.61	82
NKHEAMITDLEER	1xOxidation [M6]	2	P35579	1	1601.76	2.67e+07	3	0.13	9.17	82
GIIRPGTAFELLEAQAATGYVIDPIK		3	Q15149	1	2743.5	4.79e+07	2	2.43	26.02	82
LNGTDPEDVIR		1	P24844; O14950; P19105	0	1228.62	2.09e+07	2	0.45	13.97	82
HQILEQAVEDYAETVHQLSK		2	Q01082	0	2338.17	3.15e+07	4	2.2	20.87	82
DNIQGITKPAIR		2	P62805	1	1325.75	6.26e+07	2	-0.82	12.48	82
ELESQISELQEDLESER		2	P35579	0	2033.95	4.72e+07	3	0.43	20.83	82
AGTGVDNVDLEAATR		1	O43175	0	1488.73		2	1.02	14.12	82
NQLTSNPENTVFDAK		1	P11021	0	1677.81	6.88e+06	2	-0.26	15.03	82
ENQCVIISGESGAGK	1xCarbamidomethyl [C4]	1	Q12965	0	1548.73	5.32e+06	2	-0.01	11.6	82
YTEHSTVGLAQQWDQLDQLGMR	1xOxidation [M21]	2	Q13813	0	2592.21	1.89e+07	2	2.89	19.43	82
VEDMAELTCLNEASVLHNLK	1xCarbamidomethyl [C9]	1	P35580; P35579	0	2286.11	1.66e+07	3	0.13	21.11	81
RKQEELQQLEQQR		1	Q15149	2	1712.9	2.47e+06	2	-0.12	8.82	81
SINPDEAVAYGAAVQAAILMGDK	1xOxidation [M20]	1	P0DMV8; P34931	0	2320.15	2.84e+06	3	0.8	24.96	81
VHSPSGALEECYVTEIDQDK	1xCarbamidomethyl [C11]	1	P21333	0	2277.03	1.92e+07	3	1.96	15.57	81
DVSSVELLMNNHQGIK	1xOxidation [M9]	2	Q01082	0	1799.9	1.08e+07	2	0.78	15.25	81
NFINNPLAQADWAAK		1	P35579	0	1672.84	8.93e+07	2	0.5	21.3	81
VIQYLAYVASSHK		3	P35579	0	1478.8	2.91e+08	2	1.26	17.22	81
GVIDMGNSLIER	1xOxidation [M5]	1	Q13813	0	1319.66	2.55e+07	2	-0.07	15.31	81
VPTANVSVVDLTCR	1xCarbamidomethyl [C13]	1	P04406	0	1530.79	1.08e+07	2	0.26	17.86	81
ESQEQSLVQLEATEWR		1	Q6NYC8	0	1932.93	1.66e+06	2	0.37	19.78	81
MISEVTGGVSDTISYR	1xOxidation [M1]	1	Q9BQI0	0	1730.83	4.46e+06	2	-0.96	15.43	81
STGEAFVQFASQEIAEK		1	P31943; P55795	0	1841.89	3.68e+06	2	1.56	20.77	81
VISGVLQLGNIVFK		3	P35579	0	1486.9	1.51e+08	2	0.6	25.87	81
QLEEAEEEAQR		1	P35579	0	1331.61	5.66e+07	2	0.26	8.51	80
ILLAELEQLKGQGK		2	P08670	1	1539.91	6.21e+07	2	0.14	18.69	80
IEYNDQNDGSCDVK	1xCarbamidomethyl [C11]	1	O75369	0	1656.68	2.76e+06	2	-0.89	8.84	80
TGVELGKPTHFTVNAK		2	P21333	1	1698.92	2.55e+07	2	-0.32	12.32	80
SNTENLSQHFR		1	Q9UHB6	0	1332.63	6.06e+06	2	0.62	9.34	80
QLETVLDDLDPENALLPAGFR		3	Q9NYL9	0	2326.19	1.68e+07	2	1.01	26.99	80
VDVGKDQEFTVK		2	P21333	1	1364.71	5.36e+07	2	0.62	11.55	80
FTDEEVDELYR		1	O14950; P19105	0	1415.63	1.27e+08	2	-0.19	16.14	80
IVSSSDVGHDEYSTQSLVK		1	Q01082	0	2050.99	4.54e+06	2	-0.49	13.04	80
NFYELSPHIFALSDEAYR		1	O43795	0	2172.04	9.04e+06	3	2.14	22.57	80
VEQIAAIAQELNELDYYDSHNVNTR		1	O43707	0	2905.4	2.10e+06	4	0.13	23.6	80
DLAALGDKVNSLGETAER		2	Q13813	1	1858.95	9.18e+06	2	1.64	17.02	80
ALNSIIDVYHK		2	P05109	0	1272.69	4.48e+06	2	0.36	16.46	80
MALDIEIATYR	1xOxidation [M1]	1	P08670; P41219	0	1311.66	1.94e+08	2	-0.19	18.83	80
AAEINGEVDDDDAGGEWR		1	Q92614	0	1918.8	1.05e+06	2	1.35	13.81	80
GPVSGTEPEPVYSMEAADYR	1xOxidation [M14]	1	Q14247	0	2170.96		2	-4.04	14.41	79
EIYCPAPPQIDNGIIQGER	1xCarbamidomethyl [C4]	2	P08174	0	2170.06	1.79e+06	2	0.74	19	79
KDDPVTNLNNAFEVAEK		2	O43707	1	1903.94	1.05e+07	2	-0.24	17.3	79
VAVTEGCQPSR	1xCarbamidomethyl [C7]	1	O75369	0	1203.58	8.88e+06	2	-0.5	8.27	79
ELEDATETADAMNR		1	P35579	0	1565.67	3.73e+07	2	-0.66	11.74	79
QSGQTDPLQKEELQSGVDAANSAAQQYQR		1	P46940	1	3147.49	2.88e+06	3	-0.5	15.04	79
SPYTVTVGQACNPSACR	2xCarbamidomethyl [C11; C16]	2	P21333	0	1867.84	1.79e+07	2	-0.57	13.05	79
NVEQDELQQVIR		1	P28290	0	1470.75	1.88e+06	2	0.74	16.49	79
ALEEAMEQKAELER	1xOxidation [M6]	2	P35579	1	1662.8	3.81e+06	2	0.45	9.58	79
GAGTGGLGLTVEGPCEAK	1xCarbamidomethyl [C15]	1	O75369; Q14315	0	1673.82	8.75e+06	2	-0.28	16	79
LVSNHSLHETSSVFVDSLTK		3	P21333	0	2200.12	6.38e+07	2	-0.39	15.65	79
LSLGTYASLHGR		2	Q9UHB6	0	1274.69	1.89e+07	2	-0.23	14.43	79
VEVGKDQEFTVDTR		1	O75369	1	1622.8	6.05e+06	2	0.98	12.14	79
VSGQGLHEGHTFEPAEFIIDTR		3	P21333	0	2440.19	8.72e+07	2	0.04	18.57	78
DIILQSNPLLEAFGNAK		2	Q12965; O00160	0	1843	4.79e+07	2	0.61	26.92	78
LQEDKEQMAQQLAEETQGFQR		1	Q15149	1	2507.18	3.17e+06	3	-1.08	16.43	78
AEVVETTQVYTEEETRR		2	Q15149	1	2039.99	3.58e+07	2	0.04	12.15	78
YAPSEAGLHEMDIR		1	P21333	0	1588.74	3.61e+06	2	-0.5	13.92	78
FMDSVIFTLYNYASNQR	1xOxidation [M2]	2	P46940	0	2084.97	1.16e+06	2	-0.79	24.93	78
LLEAQIATGGIIDPEESHR		1	Q15149	0	2049.06	1.07e+07	3	0.9	18.62	78
ELDSITPEVLPGWK		1	Q16891	0	1583.83	1.19e+07	2	-1.75	22.63	78
KVEAQLQELQVK		2	P35579	1	1412.81	5.25e+07	2	0.66	13.19	78
IFVGNVSAACTSQELR	1xCarbamidomethyl [C10]	1	Q96PK6	0	1751.87	2.24e+06	2	-0.31	16.61	78
SAGQGEVLVYVEDPAGHQEEAK		2	P21333	0	2313.1	4.27e+07	2	0.14	16.01	78
ISIEMNGTLEDQLSHLK	1xOxidation [M5]	1	O43707	0	1943.97	2.83e+06	3	0.32	18.36	77
FGMLDATDGPGTEDAALR	1xOxidation [M3]	1	Q6WCQ1	0	1852.84	1.67e+06	2	-0.32	16.15	77
QLLQANPILEAFGNAK		2	P35749; P35579; Q7Z406	0	1726.95	1.27e+08	2	1.42	24.7	77
TGVAVNKPAEFTVDAK		2	P21333	1	1646.87	5.59e+07	2	-0.08	13.44	77
FADLSEAANR		6	P08670	0	1093.53	7.27e+08	2	0.23	12.17	77
MSLLQLVEILQSK	1xOxidation [M1]	2	O00159	0	1517.86	3.09e+07	2	-0.06	27.1	77
EEEIAALVIDNGSGMCK	1xAcetyl [N-Term]; 1xCarbamidomethyl [C16]; 1xOxidation [M15]	5	P63261	0	1893.86	2.45e+07	2	0.13	24.8	77
AVQGAQQPSLYQIR		1	Q13045	0	1558.83	5.83e+06	2	-0.12	14.85	77
DVQDSLTVSNEAQTAK		2	P52907	0	1705.82	2.91e+07	2	1.5	12.63	77
TGDFQLHTNVNDGTEFGGSIYQK		1	P45880	0	2528.17	7.78e+06	3	-1.87	16.7	77
EQLLQSNPVLEAFGNAK		2	Q9UBC5; O43795	0	1857.97	1.37e+07	2	0.66	23.1	77
DQGTYEDYVEGLR		1	P60660	0	1544.69	3.02e+07	2	-0.41	17.24	77
IMGGSGTETTLEK	1xOxidation [M2]	1	Q86V48	0	1339.64		2	1.23	8.98	77
TFSVWYVPEVTGTHK		2	P21333	0	1750.88	3.97e+07	2	0.86	20.57	77
HVINFDLPSDIEEYVHR		2	O00571; O15523	0	2083.02	4.54e+06	3	0.06	21.45	77
LQDEIQNMKEEMAR		2	P08670	1	1734.81	1.42e+07	2	1.23	13.68	77
AFVHWYVGEGMEEGEFSEAR	1xOxidation [M11]	1	P0DPH7; Q71U36; Q9NY65; P68363; Q9BQE3; P68366	0	2346.01	1.04e+07	3	-0.08	17.98	76
EEEIAALVIDNGSGMCK	1xAcetyl [N-Term]; 1xCarbamidomethyl [C16]	2	P63261	0	1877.86	3.45e+07	2	-0.5	26.29	76
HEAMITDLEER		1	P35579	0	1343.63	7.43e+06	2	-0.16	13.06	76
NFHIFYQLLEGGEEETLR		1	O00159	0	2195.08	1.13e+07	3	-1.34	23.75	76
ILLAELEQLK		18	P08670	0	1169.71	8.95e+08	2	0.34	21.93	76
AVFVDLEPTVIDEVR		2	Q71U36; P68363; Q9BQE3	0	1701.91	3.94e+07	2	1.24	23.68	76
AGTFQAFEQFGQQLLAHGHYASPEIK		2	Q13813	0	2875.42	4.02e+07	3	0.92	23.63	76
RDQAVMISGESGAGK	1xOxidation [M6]	2	O00159	1	1521.73	3.06e+06	2	0.49	8.16	76
CSYQPTMEGVHTVHVTFAGVPIPR	1xCarbamidomethyl [C1]; 1xOxidation [M7]	1	P21333	0	2699.31	1.19e+07	4	-0.57	18.27	76
MEDSVGCLETAEEVK	1xCarbamidomethyl [C7]	1	P35579	0	1696.74	3.98e+06	2	-1.24	14.86	76
LNQVCATHQHFESR	1xCarbamidomethyl [C5]	2	O43795	0	1726.81	3.31e+06	2	1.19	8.09	76
SGSGTMNLGGSLTR	1xOxidation [M6]	1	P47756	0	1353.64	4.31e+07	2	-2.4	10.84	76
IVAISEDYPR		1	Q14126	0	1162.61	4.24e+06	2	0.54	14.6	76
KGDILTLLNSTNK		1	Q13813	1	1416.81	9.01e+06	2	1.15	18.25	76
ANDDIIVNWVNR		1	P13797	0	1428.72	3.14e+06	2	0.3	20.22	76
AYHEQLSVAEITNACFEPANQMVK	1xCarbamidomethyl [C15]; 1xOxidation [M22]	1	P0DPH7; Q6PEY2; Q71U36; P68363; P68366	0	2766.29	7.94e+06	3	-0.27	18.15	76
ESADPLGAWLQDAR		1	Q15149	0	1528.74	2.57e+07	2	-1.43	22.6	76
EKLCYVALDFEQEMATAASSSSLEK	1xCarbamidomethyl [C4]	2	P60709; Q6S8J3; P63261	1	2807.31	5.54e+07	3	-1.07	23.27	76
FAIQDISVEETSAK		1	P12814; Q08043; P35609; O43707	0	1537.77	1.79e+07	2	0.82	18.05	76
AGVAAPATQVAQVTLQSVQR		2	Q15149	0	1995.1	4.28e+07	2	0.14	19.45	76
DAGYGGLSLSIEGPSK		1	P21333	0	1550.77	2.50e+07	2	0.33	19.26	76
RQLEEAEEEAQR		2	P35579	1	1487.71	2.07e+07	2	-0.53	7.43	76
LRAETEQGEQQR		1	Q15149	1	1444.71	2.57e+06	2	-0.07	6.52	76
LPLLAVCDYK	1xCarbamidomethyl [C7]	1	Q15149	0	1191.64	1.50e+07	2	0.93	20.13	75
ADGQVAELLLR	1xAcetyl [N-Term]	1	Q9Y285	0	1226.67	7.67e+05	2	-0.04	25.65	75
TVTAMDVVYALK	1xOxidation [M5]	1	P62805	0	1326.7	1.68e+07	2	0.24	18.55	75
EVATNSELVQSGK		1	P02533; Q04695	0	1361.69	2.56e+07	2	0.29	10.12	75
SWVNQMESQTGEASK	1xOxidation [M6]	1	P46940	0	1697.74	1.78e+06	2	-0.55	9.89	75
YGSFEEAEASYPILNR		1	O95425	0	1845.87	3.56e+06	2	2.6	18.92	75
AGVVGPELHEQLLSAEK		2	Q15149	0	1776.95	4.12e+07	2	-0.42	15.98	75
IANLQTDLSDGLR		2	P21333	0	1415.75	9.44e+07	2	-1.59	17.51	75
FRCPEALFQPSFLGMESCGIHETTFNSIMK	2xCarbamidomethyl [C3; C18]; 2xOxidation [M15; M29]	3	P60709; P63261	1	3566.62	4.05e+08	3	0.36	20.83	75
AHQVVEDGYEFFAK		1	P62136; P36873; P62140	0	1639.78	7.51e+06	2	-0.54	16.37	75
YVELFLNSTAGASGGAYEHR		1	P31943	0	2142.03	1.83e+06	3	-0.26	18.28	75
ITENSIVENLK		1	Q12965	0	1259.68	4.26e+07	2	1.24	15.72	75
ILAIGLINEALDEGDAQK		2	P46940	0	1883.01	2.71e+07	2	-0.08	25.3	75
LQDEIQNMKEEMAR	1xOxidation [M]	4	P08670	1	1750.81	5.45e+07	2	-0.34	9.58	75
YSLVSEQLEPAATSTYR		1	Q9Y446	0	1914.94		2	-1.83	17.63	75
TEEASSGFLPGDR		1	Q8WWI1	0	1365.63	1.20e+07	2	0	13.97	75
TQTAIASEDMPNTLTEAEK	1xOxidation [M10]	1	Q01082	0	2065.96	6.05e+06	2	-0.89	12.97	75
IQVHYYEDGNVQLVSHK		2	P47755; P52907	0	2029.01	3.00e+07	2	-0.62	13.42	75
SNEEEETSDSSLEK		1	O95425	0	1583.66		2	-1.65	7.84	75
AVTEQGAELSNEER		1	P27348	0	1532.72	2.19e+06	2	0.22	9.51	75
TQLEELEDELQATEDAK		2	P35580; P35749; P35579	0	1961.92	5.51e+07	2	2.07	20.49	75
RIQLVEEELDR		2	P67936; P09493; P07951; P06753	1	1399.75	2.13e+07	2	-0.01	14.55	74
HQTLQGVAFPISR		2	Q12792	0	1453.79	1.92e+07	3	0.82	16.42	74
VSTTLNVAQAYYAR		1	O43795	0	1556.81	1.42e+07	2	-0.11	16.58	74
EKEQLMASDDFGR	1xOxidation [M6]	1	Q13813	1	1541.69	2.80e+06	2	-1.46	10.19	74
IDGQQTIIACIESHQFQAK	1xCarbamidomethyl [C10]	1	P47755	0	2187.09	6.45e+06	3	0.06	19.37	74
LIGNMALLPIR		1	O15145	0	1210.73	2.02e+06	2	0.13	23.57	74
WIDATSGIYNSEK		1	Q8WWI1	0	1483.71	1.19e+07	2	-0.25	15.94	74
MALDIEIATYR		1	P08670; P41219	0	1295.67	1.24e+07	2	0.78	20.97	74
AELFTQSCADLDK	1xCarbamidomethyl [C8]	1	Q01082	0	1497.69	4.90e+06	2	0.26	15.4	74
AGQSAAGAAPGGGVDTR		1	P21333	0	1442.7	3.98e+06	2	0.37	8.19	74
DASVAEAWLLGQEPYLSSR		2	Q01082	0	2092.03	1.62e+07	2	0.19	25.03	74
AAAPQAWAGPMEEPPQAQAPPR	1xOxidation [M11]	2	Q16643	0	2287.09	1.39e+07	2	-0.57	14.8	74
ANEPTHFTVDCTEAGEGDVSVGIK	1xCarbamidomethyl [C11]	1	O75369	0	2533.15	7.02e+06	3	-0.35	15.63	74
KQEELQQLEQQR		1	Q15149	1	1556.8	2.25e+06	2	0.05	10.13	74
VNSININQGSITFAGGPGR		2	O00159	0	1901.98	2.59e+07	2	0.4	18.14	74
EASDPQPEEADGGLK		1	P52907	0	1542.69	2.20e+07	2	0.71	9.68	73
ALGALVDSCAPGLCPDWDSWDASKPVTNAR	2xCarbamidomethyl [C9; C14]	1	P21333	1	3229.5	1.08e+07	3	-3.43	21.85	73
ENLLEEQGSIALR		1	Q13813	0	1471.78	1.82e+07	2	0.23	18.35	73
LLDAQLATGGIVDPR		2	Q15149	0	1538.85	2.84e+07	2	-0.39	19.54	73
DGFIDKEDLHDMLASLGK	1xOxidation [M12]	2	P24844; O14950; P19105	1	2019.97	4.31e+07	2	1.02	17.76	73
AITGASLADIMAK	1xOxidation [M11]	1	P83731	0	1277.68	4.59e+06	2	-0.32	16.14	73
AFGPGLQGGSAGSPAR		1	P21333	0	1429.72	7.11e+07	2	-0.81	12.73	73
LSLQDAVSQGVIDQDMATR	1xOxidation [M16]	1	P15924	0	2063.01	1.29e+06	2	-0.35	18.9	73
YQTQPVTLGEVEQVQSGK		1	O95425	0	1991.01		2	-0.32	16.51	73
SVTEQGAELSNEER		1	P63104	0	1548.71	1.09e+06	2	-0.52	9.65	73
QQYEQCMDLQLFYR	1xCarbamidomethyl [C6]; 1xOxidation [M7]	1	Q13813	0	1937.85	2.70e+06	2	-1.23	18.88	73
HQGVMVGMGQK		2	P63267; P60709; P62736; P68133; Q562R1; P68032; P63261	0	1171.57	1.58e+08	2	-0.8	9.47	73
SSTVATLQGTPDHGDPR		1	Q8IVT2	0	1738.84		2	-0.19	10.03	73
STSQGSINSPVYSR		1	O14639	0	1482.72	2.48e+06	2	-0.41	10.68	73
LDETGNLMISEGHFASETIR	1xOxidation [M8]	1	Q13813	0	2236.06	1.51e+07	3	-0.09	16.48	73
LQNVQIALDYLR		1	Q15149	0	1445.81	3.29e+07	2	0.67	21.84	73
TEMEDLMSSKDDVGK	2xOxidation [M3; M7]	2	P35579	1	1716.73	1.51e+07	2	0.15	7.88	73
SQVMDEATALQLR	1xOxidation [M4]	1	Q15149	0	1477.73	1.87e+07	2	0.07	14.91	73
KLEVEANNAFDQYR		2	P47756	1	1696.83	4.81e+07	2	-0.73	13.92	73
GFFDPNTHENLTYR		2	Q15149	0	1710.79	3.56e+07	2	-0.16	15.95	73
NQVALNPQNTVFDAK		1	P0DMV8	0	1658.85	6.45e+06	2	-0.59	16.71	73
TVAGGAWTYNTTSAVTVK		1	P61513	0	1826.93	1.16e+06	2	0.38	16.65	73
IECDDKGDGSCDVR	2xCarbamidomethyl [C3; C11]	2	P21333; Q14315	1	1625.65	1.84e+07	2	-0.38	6.8	73
APLNVQFNSPLPGDAVK		2	O75369	0	1766.94	1.47e+07	2	0.4	20.14	73
QVQSLTCEVDALK	1xCarbamidomethyl [C7]	1	P08670	0	1490.75	1.25e+08	2	-0.68	16.63	73
NASTFEDVTQVSSAYQK		1	Q14247	0	1874.88	3.35e+06	2	-1.97	15.79	73
HSGNITFDEIVNIAR		1	P30050	0	1685.86	1.64e+06	2	4.11	20.43	72
LTTLELLEVR		1	Q01082	0	1186.7	3.87e+07	2	0.5	22.11	72
FRAPDEPQQAQVPHVWGWEVAGAPALR		1	Q8IVT2	1	3012.52	2.19e+06	3	-0.97	20.43	72
HQLLEADISAHEDR		2	Q13813	0	1633.79	1.98e+07	2	-1.85	11.61	72
MFLGDNAHLSIINEYLSQSYQK	1xOxidation [M1]	1	P46940	0	2587.25	8.19e+06	3	0.83	22.31	72
TLEGQLVQHPGPGIPR		2	Q92614	0	1698.93	6.46e+06	2	-0.83	14.7	72
QLEMSAEAER	1xOxidation [M4]	1	Q15149	0	1179.53	5.18e+06	2	-0.08	7.42	72
LLDPEDISVDHPDEK		2	Q01082	0	1721.82	4.17e+07	2	1.26	15.75	72
TLSPTPSAEGYQDVR		1	O14639	0	1620.79	2.80e+06	2	0.47	13.09	72
AQAEAQQPTFDALR		1	Q15149	0	1545.77	2.92e+06	2	-0.11	14.97	72
MQHNLEQQIQAR	1xOxidation [M1]	2	Q13813	0	1511.74	1.93e+07	2	0.56	9.15	72
FGYQFTQQGPR		1	Q9NYL9	0	1328.64	5.67e+07	2	0.57	14.84	72
DAGYGGISLAVEGPSK		1	O75369	0	1520.76	7.91e+06	2	0.06	18.11	72
GLFDEEMNEILTDPSDDTK	1xOxidation [M7]	1	Q15149	0	2184.95	6.20e+06	2	-1.96	19.93	72
LEDLEVIQHR		2	Q01082	0	1251.67	1.20e+07	2	-1.9	13.8	72
YEVTSGGGGTSR		1	P15924	0	1170.54	1.88e+06	2	0.68	7.47	72
TAGYPNVNIHNFTTSWR		2	Q01082	0	1977.96	3.20e+07	2	0.99	18.32	72
IAQLEEQLDNETK		2	P35579	0	1530.76	1.34e+08	2	-0.17	14.01	72
SIITYVSSLYDAMPR	1xOxidation [M13]	2	Q15149	0	1731.86	2.18e+07	2	1.64	23.31	72
ALVWGTAGDSLCPK	1xCarbamidomethyl [C12]	1	Q96M02	0	1474.74	3.71e+06	2	1.17	18.63	72
EAFLNTEDKGDSLDSVEALIK		2	Q13813	1	2294.14	1.56e+07	3	0.37	21.53	72
NEIIILANTTNTELKDLPK		1	Q12792	1	2140.19	4.34e+06	3	0.93	20.74	72
VLYAYGYYTGEPSKR		2	O14880	1	1766.87	1.32e+07	2	0.2	14.34	72
VFDKEGNGTVMGAEIR	1xOxidation [M11]	1	P60660	1	1738.84	2.14e+06	2	0.54	11.02	72
FLSAIVSSVDKIPYGMR	1xOxidation [M16]	2	P46940	1	1899	7.05e+06	2	-0.77	20.71	71
LCLISTFLEDGIR	1xCarbamidomethyl [C2]	1	O15260	0	1536.81		2	2.44	26.19	71
CRPDQLTGLSLLPLSEK	1xCarbamidomethyl [C1]	2	Q15149	1	1927.03	9.92e+06	2	1.93	21.71	71
IILDLISESPIK		1	P61978	0	1340.8	4.72e+06	2	0.71	24.36	71
SAINEVVTR		1	P62899	0	988.54	4.32e+06	2	-0.02	11.58	71
AVLLASDAQECTLEEVVER	1xCarbamidomethyl [C11]	1	Q27J81	0	2132.05	4.01e+06	3	-0.48	21.13	71
QGIEYILSNQGYVR		1	Q27J81	0	1639.84	4.60e+06	2	-1.07	19.33	71
FDVPGDENAEMDAR	1xOxidation [M11]	1	P46940	0	1581.65	4.49e+06	2	-0.75	13.13	71
ALLADAQLMLDHLK		1	Q92614	0	1551.86	2.52e+06	3	0.37	23.01	71
IGGIGTVPVGR		1	Q05639; P68104; Q5VTE0	0	1025.61	4.02e+07	2	0.43	15.02	71
IVEANPLLEAFGNAK		1	Q9UM54	0	1585.86	8.52e+06	2	0.62	23.41	71
ARQEELYSELQAR		2	Q15149	1	1592.8	3.16e+07	2	-0.18	12.79	71
TFHIFYYLLSGAGEHLK		5	P35579	0	1996.03	1.30e+08	2	0.52	23.19	71
FGQGGAGPVGGQGPR		1	P23246	0	1341.67	1.16e+06	2	0.09	10.28	71
EGEDMIAEEHFGSEK	1xOxidation [M5]	1	Q01082	0	1723.71	2.07e+06	2	0.65	11.03	71
SSSVGSSSSYPISPAVSR		1	Q15149	0	1754.86	1.18e+07	2	-0.08	13.9	71
NENEEILERPAQLANAR		1	Q9UHB6	1	1966.99	9.96e+06	2	0.79	14.6	71
APSVANVGSHCDLSLK	1xCarbamidomethyl [C11]	2	P21333	0	1654.82	1.83e+07	2	-2.6	13.39	71
ATTATMATSGSAR	1xAcetyl [N-Term]; 1xOxidation [M6]	1	P38919	0	1283.59		2	0.32	9.05	71
ISVYYNEATGGK		1	P07437	0	1301.64	2.18e+07	2	0.6	12.64	71
DLDIIDNYDYSHTVK		1	O75369	0	1810.85	7.01e+06	2	-0.19	18.17	70
VSHLLGINVTDFTR		4	P35579	0	1571.85	2.03e+08	2	0.72	19.68	70
ADHPPAEVTSHAASGAK		1	Q9UHB6	0	1645.79	1.43e+06	3	0.49	6.94	70
SQEADVQDWEFR		1	Q9C0C2	0	1509.66		2	0.23	16.56	70
YPALTKPENQDIDWTLLEGETR		1	P13797	1	2589.28	4.00e+06	3	1.11	20.68	70
MLTAQDMSYDEAR	2xOxidation [M1; M7]	1	Q01082	0	1562.65	6.69e+06	2	0.1	9.66	70
AGKLDPHLVLDQLR		2	P35580; P35579	1	1574.9	5.35e+06	2	-0.94	17.98	70
TINEVENQILTR		1	P12814; O43707	0	1429.76	2.75e+07	2	2.08	16.18	70
LLEAQIATGGVIDPVHSHR		1	P58107; Q15149	0	2013.09	1.45e+07	3	0.13	16.73	70
AGTLSITEFADMLSGNAGGFR	1xOxidation [M12]	1	Q15149	0	2131.01	3.85e+06	3	1.16	24.53	70
MLTAQDMSYDEAR	1xOxidation [M]	2	Q01082	0	1546.65	5.28e+06	2	0.13	11.14	70
FEELNADLFR		1	P54652; P11142	0	1253.62	4.05e+06	2	0.63	20.19	70
LLHYAGEVTYSVTGFLDKNNDLLFR		1	O00159	1	2885.48	3.93e+06	4	-0.23	23.39	70
VLNVPLCKEDCEQWWEDCR	3xCarbamidomethyl [C7; C11; C18]	1	P15328	1	2536.11	4.45e+07	3	0.58	18.88	70
EVAGAKPHITAAEGK		2	Q16891	1	1478.8	3.38e+06	2	-1.22	7.77	70
DVLLQVDDER		1	P35579	0	1201.61	1.15e+07	2	-0.22	16.29	70
SQLLGSAHEVQR		2	Q13813	0	1324.7	4.35e+07	2	-0.25	9.63	70
NFHVFYQLLSGASEELLNK		2	O43795	0	2209.13	5.10e+06	3	0.59	26.08	70
LQMEAGLCEEQLNQADALLQSDVR	1xCarbamidomethyl [C8]; 1xOxidation [M3]	1	Q15149	0	2747.3	6.85e+06	3	-0.69	20.79	69
SLPIYSPEKVEEYR		2	O43795	1	1709.87	1.11e+07	2	-0.81	15.88	69
DPYTGQQISLFQAMQK	1xOxidation [M14]	2	Q15149	0	1870.9	5.04e+06	2	-0.16	18.66	69
VPVKDVVDPSK		1	O75369	1	1182.67	6.58e+06	2	-0.28	10.39	69
FITHAPPGEFNEVFNDVR		3	P52907	0	2089.01	1.04e+08	3	-0.14	19.16	69
VLDFEHFLPMLQTVAK		1	P60660	0	1888	7.15e+06	2	0.84	26.93	69
HEMPPHIYAITDTAYR	1xOxidation [M3]	3	P35579	0	1930.91	6.19e+07	3	-0.2	13.73	69
SGPFGQIFRPDNFVFGQSGAGNNWAK		1	Q13885; P04350; P07437; P68371; Q9BVA1	1	2798.34	2.28e+07	3	1.04	23.35	69
NTDQASMPDNTAAQK	1xOxidation [M7]	1	P35749; P35579	0	1607.7	9.45e+06	2	-0.23	6.55	69
APVPASELLASGVLSR		2	Q15149	0	1566.88	6.91e+07	2	-0.19	21.87	69
DVSSVELLMNNHQGIK		1	Q01082	0	1783.9		2	0.19	18.13	69
LSTPIAGLDNINVFLK		1	Q8WWI1	0	1714.97	3.34e+06	2	0.71	26.28	69
QKDFLDGVYAFEYYPSTPGR		1	O75369	1	2353.11	6.82e+06	3	2.37	21.81	69
APASSLHTQEAGR		2	O95425	0	1324.66	3.57e+06	2	-0.43	6.9	69
QSAEEQAQAR		1	Q15149	0	1117.52	1.06e+06	2	-0.33	6.3	69
KHEALMSDLSAYGSSIQALR		1	Q13813	1	2177.1	2.79e+06	3	0.72	18.32	69
QQVAPTDDETGKELVLALYDYQEK		1	Q13813	1	2753.35	9.53e+06	3	0.67	21.59	69
DLSSVQTLLTK		1	Q13813	0	1204.68	3.47e+07	2	0.45	20.36	69
VLALPEPSPAAPTLR		2	Q15149	0	1531.88	6.22e+07	3	0.28	20.07	69
SVKEDSNLTLQEK		1	P46940	1	1490.77	3.58e+06	2	-0.07	9.64	69
FDSELSQAHEEAQR		1	Q92614	0	1646.74		3	0.01	9.64	69
EIFLSQPILLELEAPLK		1	P62136; P36873; P62140	0	1953.13		2	0.36	27.22	69
VDSIDDR		1	Q01082	0	819.38	7.48e+06	2	-1.15	7.42	68
LTLSALIDGK		1	Q9Y277	0	1030.61	7.60e+06	2	0.37	21.12	68
HQGVMVGMGQKDSYVGDEAQSK	2xOxidation [M5; M8]	1	P63267; P60709; P62736; P68133; P68032; P63261	1	2383.07	2.53e+06	3	-0.77	8.62	68
IIGLDQVAGMSETALPGAFK	1xOxidation [M10]	2	P35579	0	2034.06	1.33e+08	2	0.03	22.25	68
YSEKEDKYEEEIK		1	P67936	2	1689.79	1.27e+06	2	-0.76	8.46	68
AIMTYVSSFYHAFSGAQK	1xOxidation [M3]	2	P12814; O43707	0	2023.96	1.04e+07	2	3.84	20.15	68
ATAGDTHLGGEDFDNR		1	P48741; P17066; P0DMV8; P34931	0	1675.73	2.30e+06	2	-0.96	10.34	68
SCSGVEFSTSGSSNTDTGK	1xCarbamidomethyl [C2]	1	P45880	0	1907.79	2.46e+06	2	-0.86	10.5	68
YFEITDESPYVHYLNTFSSK		1	Q9ULV4	0	2440.13	7.62e+06	3	0.37	21.9	68
KLVILEGELER		2	P67936; P07951	1	1298.77	2.72e+07	2	-0.25	16.64	68
VLQSFTVDSSK		1	O75369	0	1210.63	1.45e+07	2	0.2	13.86	68
LNDSILQATEQR		1	P15924	0	1387.72	2.10e+06	2	2.02	15.32	68
LEGYWGEAQSLCQAVDEHLR	1xCarbamidomethyl [C12]	1	Q96SB3	0	2361.09		3	-1.09	21.54	68
LSEIDVSSEGVK		1	Q96C19	0	1262.65	4.99e+07	2	-0.33	13.53	68
SFDSASQVPNPAAAAIPR		1	Q69YQ0	0	1798.91		2	-2.84	18	68
ASITPGTILIILTGR		1	Q02878	0	1525.93		2	0.08	27.32	68
INEVQTDVGVDTK		1	Q12792	0	1417.72	1.44e+07	2	0.55	11.86	68
HQAFEAEVQANSGAIVK		2	Q13813	0	1798.91	1.68e+07	3	-2.92	13.63	68
GWSMSEQSEESVGGR		1	Q9UHB6	0	1625.69	3.28e+06	2	-1.92	12.74	68
VGSTSENITQK		1	O00571; O15523	0	1163.59	1.55e+06	2	-0.52	7.54	68
NILAEQLQAETELFAEAEEMR	1xOxidation [M20]	1	P35580	0	2451.17	1.15e+06	3	-1.56	25.99	68
QEYDESGPSIVHR		10	A5A3E0; Q9BYX7; P0CG39; P60709; Q6S8J3; P0CG38; P63261	0	1516.7	2.05e+09	2	-1.76	10.85	67
WSTAVEFCK	1xCarbamidomethyl [C8]	1	P08174	0	1127.52	3.77e+06	2	0.62	15.5	67
VVSSVLQFGNISFK		1	P35580	0	1524.84	2.61e+06	2	-1.42	23.02	67
HTLVEADIGIQAER		2	Q01082	0	1551.81	1.66e+07	2	0.71	15.05	67
KFPVDLR		1	Q92614	1	874.51	4.06e+06	2	0	14.02	67
RAPSVANVGSHCDLSLK	1xCarbamidomethyl [C12]	2	P21333	1	1810.92	7.87e+06	3	0.87	11.65	67
HQAFEAELSANQSR		1	Q13813	0	1587.75	1.28e+07	2	0.01	11.18	67
LQQTYAALNSK		1	P46940	0	1236.66	1.43e+07	2	-0.32	11.22	67
TDEFQLHTNVNDGTEFGGSIYQK		1	P21796	0	2600.19	3.23e+06	3	0.06	17.22	67
AGPGTLSVTIEGPSK		1	O75369	0	1413.76	2.43e+07	2	0.58	16.04	67
KHQLLEADISAHEDR		3	Q13813	1	1761.89	9.13e+06	2	2.23	9.86	67
IFCCHGGLSPDLQSMEQIR	2xCarbamidomethyl [C3; C4]; 1xOxidation [M15]	1	P62136; P36873; P62140	0	2264.03	6.43e+06	3	0	15.26	67
LATQSNEITIPVTFESR		1	P04792	0	1905.99	2.03e+06	2	1.6	20.8	67
TVLELMNPEAQLPQVYPFAADLYQK	1xOxidation [M6]	1	P46940	0	2894.46	2.49e+06	3	0.04	26.15	67
LAALADQWQFLVQK		2	Q13813	0	1630.9	3.45e+07	2	0.92	23.8	67
AAHIFNEALVCHQIR	1xCarbamidomethyl [C11]	1	O43795	0	1778.91	4.97e+06	3	0.42	14.28	67
FSGSGSGTDFTLK		2	P01614; A2NJV5; P01615; A0A075B6S2; A0A0A0MRZ7; P06310; A0A075B6S6	0	1303.62	2.46e+08	2	-0.35	14.54	67
LEDLEVVQQR		1	O15020	0	1228.65	1.24e+06	2	-1.25	14.45	67
KVESLQEEIAFLK		4	P08670	1	1533.85	4.89e+08	2	-0.04	19.61	67
LELLAAYEEVIR		1	Q16643	0	1418.79	1.84e+07	2	0.28	24.22	67
QAQQERDELADEIANSSGK		1	P35579	1	2088.98	1.05e+07	2	1.32	12.22	67
ETNLDSLPLVDTHSK		5	P08670	0	1668.84	4.62e+08	2	0.74	17.07	67
SESIHVTLNVEQACYTR	1xCarbamidomethyl [C14]	2	Q12965	0	2006.96	8.56e+06	2	1.03	15.82	67
DDDIAALVVDNGSGMCK	1xAcetyl [N-Term]; 1xCarbamidomethyl [C16]; 1xOxidation [M15]	3	P60709	0	1837.79	1.52e+08	2	0.52	22.1	67
LTAEDLFEAR		1	Q15149	0	1164.59	4.22e+07	2	-0.11	19.14	67
YGIDKDKVDK		1	Q14247	2	1180.62		2	-0.87	7.28	67
DPYTGQSVSLFQALK		1	Q15149	0	1653.85	3.01e+07	2	0.18	22.63	67
LAQGHTTVDELAR		2	Q15149	0	1410.73	4.92e+07	2	-0.09	10.32	67
DYEEIGPSICR	1xCarbamidomethyl [C10]	1	P61158	0	1338.6	5.15e+06	2	0.07	14.88	67
DLDEDELLGNLSETELK		1	Q9NYL9	0	1932.93	1.75e+06	2	-0.33	22.83	67
YADEEIPR		1	O75369	0	992.47	2.25e+07	2	0.76	10.5	67
THIQDNHDGTYTVAYVPDVTGR		1	P21333	0	2459.16	3.69e+06	3	-0.44	15	67
TDLEKDIISDTSGDFR		1	A6NMY6; P07355	1	1811.87		2	-0.6	17.38	66
GQLGDAVSGTDVR		1	Q9UPQ0	0	1274.63	5.99e+06	2	0.63	11.44	66
TNEKVELQELNDR		2	P17661; P08670	1	1587.8	2.17e+08	2	0.38	11.61	66
EFALNNENYSLSNR		1	Q86V48	0	1670.78	3.37e+06	2	-3.5	16.15	66
LAPDYDALDVANK		1	P62750	0	1404.7	4.43e+06	2	0.49	16.46	66
VLEQLTGQTPVFSK		1	P62913	0	1546.85	7.46e+06	2	0.58	18.2	66
VLAVNQENEQLMEDYEK	1xOxidation [M12]	1	P12814	0	2067.95	2.75e+06	2	0.46	14.29	66
AEVQVLVLDGR	1xAcetyl [N-Term]	1	P40429	0	1240.69	9.80e+05	2	-0.46	24.43	66
MSATFIGNSTAIQELFK	1xOxidation [M1]	1	Q13885; P68371; Q9BVA1	0	1873.94	6.32e+06	2	1.32	24.04	66
EAGAGGLSIAVEGPSK		1	O75369; Q14315	0	1442.75	1.44e+07	2	-1.33	15.71	66
VLFASQEIPASPFR		2	O75369	0	1561.84	3.10e+07	2	0.56	21.68	66
AGVSFSGHR	1xAcetyl [N-Term]	1	Q16643	0	959.47	1.16e+08	2	0.76	11.72	66
LLEAQIATGGIIDPVHSHR		3	P58107; Q15149	0	2027.1	3.95e+07	3	-0.15	17.82	66
ILITIVEEVETLR		2	Q15149	0	1527.9	6.68e+06	2	0.63	26.53	66
ICDQWDALGSLTHSR	1xCarbamidomethyl [C2]	1	O43707	0	1758.82	9.55e+06	3	0.55	18.52	66
QQLGTAVELEMAK	1xOxidation [M11]	1	Q9NYL9	0	1433.73	1.44e+07	2	-0.3	14.27	66
SALSGHLETVILGLLK		2	A6NMY6; P07355	0	1650.98	1.87e+07	2	-0.12	26.24	66
DLLPSDMAVALLEAQAGTGHIIDPATSAR	1xOxidation [M7]	2	Q15149	0	2949.5	1.87e+07	3	-2.37	24.9	66
VLQALGSEPIQYAVPVVK		2	O00159	0	1911.09	6.41e+07	2	-0.17	21.97	66
HDITLQLAEAER		1	Q86V48	0	1395.72	2.30e+06	2	-1.55	15.05	66
SADFVVEAIGDDVGTLGFSVEGPSQAK		1	P21333	0	2695.31	1.33e+06	3	0.41	26.1	66
STQGVTLTDLQEAEK		1	O14974	0	1619.81		2	-0.81	15.82	66
KFEEFQTDMAAHEER	1xOxidation [M9]	2	Q13813	1	1883.82	1.02e+07	3	-0.16	9.54	66
EAGFLRPVTIFGPIADVAR		1	Q07157	1	2029.12	8.62e+05	3	1.19	24.84	66
NAFACFDEEATGTIQEDYLR	1xCarbamidomethyl [C5]	1	O14950; P19105	0	2350.03	8.93e+06	3	0.31	21.33	66
DQAVMISGESGAGK		1	O00159	0	1349.64	2.77e+06	2	0.61	11.37	66
TDSFVPR		1	Q14573	0	821.42	4.75e+06	2	-0.5	11.47	66
LASDLLEWIR		1	P12814; O43707	0	1215.67	4.65e+07	2	-1.45	24.93	66
IFLLTNNNLLLADQK		1	O43795	0	1729.98	1.24e+07	2	-0.65	24.32	65
ANESSPKPVGPPPER		2	Q9BQI0	1	1561.8	4.12e+06	2	0.1	8.51	65
FGGEHVPNSPFQVTALAGDQPSVQPPLR		2	P21333	0	2945.49	6.74e+07	3	2.16	21.16	65
ARSDEGQLSPATR		1	Q15149	1	1387.69	1.04e+06	2	0.62	7.54	65
CQLEINFNTLQTK	1xCarbamidomethyl [C1]	1	P12814; Q08043; P35609; O43707	0	1608.81	6.17e+06	2	0.58	19.48	65
SEVQQPVHPKPLSPDSR		3	Q9UHB6	1	1900.99	2.54e+07	2	1.57	9.45	65
ERDVYEELLTQAEIQGNINK		1	P46940	1	2362.19	7.76e+06	3	1.56	20.48	65
TIDGQQTIIACIESHQFQPK	1xCarbamidomethyl [C11]	2	P52907	0	2314.15	4.10e+07	2	0.36	19.77	65
QGPEESGLGDGTGPK		1	Q92614	0	1428.66	2.93e+06	2	0.05	9.37	65
VVASGPGLEHGK		1	O75369	0	1150.62	6.68e+06	2	1.49	8.17	65
ADGELNVDSLITR	1xAcetyl [N-Term]	1	P62140	0	1444.73	3.26e+06	2	1.79	23.1	65
ADAASQVLLGSGLTILSQPLMYVK	1xAcetyl [N-Term]; 1xOxidation [M21]	1	Q9Y6C9	0	2533.36		3	0.38	27.74	65
AEHMETNAVGPSPSSDTR	1xOxidation [M4]	1	Q6WCQ1	0	1901.83		3	-1.1	7.44	65
KGDILTLLNSTNKDWWK		1	Q13813	2	2032.09	5.42e+06	3	2.05	21.75	65
KGLVGPELHDR		1	Q15149	1	1220.67	1.27e+07	3	-0.83	9.26	65
DIQDSLTVSNEVQTAK		1	P47755	0	1747.87	6.00e+06	2	-0.25	15.66	65
APDEPQQAQVPHVWGWEVAGAPALR		1	Q8IVT2	0	2709.35	4.98e+06	3	0.73	21.42	65
YLGLLENLR		1	O00159	0	1090.63	5.04e+07	2	0.57	21.37	65
PGTAFELLEAQAATGYVIDPIK		1	Q15149	0	2304.21	1.50e+06	3	6.99	26.58	65
AHGPGLEGGLVGKPAEFTIDTK		3	O75369	1	2194.15	1.50e+07	2	0.64	16.54	65
DLEQPSQAAGINLEIIR		1	Q27J81	0	1866.99	5.76e+06	2	0.14	21.95	65
FMELLEPLNER		1	Q01082	0	1390.7	7.52e+06	2	0.72	22.25	65
SVLSLNLNCSSHR	1xCarbamidomethyl [C9]	1	Q96M02	0	1486.74	2.17e+06	3	-0.21	15.36	65
MKQVEELYHSLLELGEK	1xOxidation [M1]	2	Q13813	1	2062.05	5.91e+06	3	-0.47	19.9	65
VNFTVDQIR		1	P13639	0	1091.58	3.31e+06	2	-0.32	15.99	65
IGLDDEEKLDLFR		1	Q9UM54	1	1562.81	2.44e+06	3	0.82	20.14	65
VSASVAEVQEQYTER		1	Q27J81	0	1695.82	4.66e+06	2	-0.44	13.38	65
GVVDSEDIPLNLSR		1	Q12931	0	1513.79	9.14e+06	2	-0.22	19.24	64
KHQALQAEIAGHEPR		2	Q13813	1	1684.89	4.99e+06	2	-0.38	8.67	64
DGSCSAEYIPFAPGDYDVNITYGGAHIPGSPFR	1xCarbamidomethyl [C4]	1	O75369	0	3530.6		3	0.91	24.45	64
KVEDLFLTFAK		2	Q13813	1	1310.74	4.56e+07	2	-0.42	21.08	64
IPADTFAALK		1	P46940	0	1046.59	1.37e+07	2	0.57	17.36	64
LEDLLQDAQDEKEQLNEYK		1	Q15149	1	2321.11	2.54e+07	3	0.22	17.46	64
VLDFEHFLPMLQTVAK	1xOxidation [M10]	2	P60660	0	1904	1.70e+08	2	-0.28	24.91	64
GTDIMYTGTLDCWR	1xCarbamidomethyl [C12]; 1xOxidation [M5]	1	P05141	0	1704.74		2	0.37	17.87	64
MDCQECPEGYR	2xCarbamidomethyl [C3; C6]; 1xOxidation [M1]	1	P21333	0	1460.52	6.86e+06	2	-0.04	8.11	64
VTFEADENENITVVK		1	Q9NX63	0	1707.84	4.31e+06	2	0.63	16.4	64
IIDVVYNASNNELVR		1	P62241	0	1718.91	2.13e+06	2	0.56	18.76	64
NMIIDRENQCVIISGESGAGK	1xCarbamidomethyl [C10]; 1xOxidation [M2]	1	Q12965	1	2307.11	6.19e+06	3	-0.09	13.47	64
TRLEQEIATYR		2	P02533; P19012; P13646; Q04695; P08779; P35900	1	1379.73	4.44e+07	3	-0.31	12.45	64
SLYASSPGGVYATR		2	P08670	0	1428.71	6.86e+08	2	-0.12	13.52	64
LIGNMALLPIR	1xOxidation [M5]	1	O15145	0	1226.73	1.55e+07	2	2.98	20.62	64
SNDPVATAFAEMLK	1xOxidation [M12]	1	Q9NYL9	0	1509.73	1.11e+07	2	-1.04	19.15	64
ETADTDTADQVMASFK	1xOxidation [M12]	1	P12814	0	1745.75	4.74e+06	2	-0.19	13.29	64
ENDAHLVEVNLNNIK		1	Q9NYL9	0	1721.88		2	2.1	16.78	64
LTLSALVDGK		1	P45880	0	1016.6	3.22e+07	2	1.3	19.45	64
AGNNMLLVGVHGPR	1xOxidation [M5]	2	P21333	0	1450.76	3.44e+07	3	-0.76	13.03	64
VETGVLKPGMVVTFAPVNVTTEVK	1xOxidation [M10]	1	P68104; Q5VTE0	1	2531.38	2.33e+07	3	-0.6	20.71	64
CPENAFFLDHVR	1xCarbamidomethyl [C1]	2	O00159	0	1504.7	1.76e+07	2	-0.27	16.97	64
GVDEVTIVNILTNR		2	P07355	0	1542.85	2.98e+07	2	-4.06	24.31	64
TQETPSAQMEGFLNR	1xOxidation [M9]	1	Q01082	0	1724.79	8.45e+06	2	0.07	13.32	64
IFYPETTDIYDR		1	P46940	0	1532.73	5.78e+06	2	2.86	18.06	64
ANEGTVGVSAATER		1	P05186	0	1361.67	5.38e+06	2	1.81	9.61	64
DQNTVETLQR		1	Q01082	0	1203.6	2.02e+07	2	1.48	10.25	64
QAAAHTDHLR		1	Q16891	0	1119.57		2	-0.79	6.02	64
IAQLEEQLDNETKER		1	P35579	1	1815.91	1.58e+07	3	-0.97	13.09	63
GLSEDTTEETLKESFDGSVR		1	P19338	1	2200.03	1.48e+06	3	1.33	16.47	63
AVTGYKDPYSGK		1	Q15149	1	1285.64	2.71e+06	2	0.16	8.9	63
EVGHNIYILALQLSR		1	Q14573	0	1725.96	2.10e+06	3	-0.78	22.68	63
GAGSYTIMVLFADQATPTSPIR	1xOxidation [M8]	1	P21333	0	2312.16	9.70e+06	3	1.05	23.47	63
SQVEEELFSVR		2	Q15149	0	1322.66	3.29e+07	2	-0.13	17.99	63
VLYQVEGFVDKNNDLLYR		2	O43795	1	2185.13	1.50e+07	3	-0.24	19.96	63
LQEDKEQMAQQLAEETQGFQR	1xOxidation [M8]	1	Q15149	1	2523.18	3.10e+06	3	-0.38	13.73	63
FANSLVGVQQQLQAFNTYR		1	Q01082	0	2184.12	9.40e+06	3	-0.46	22.61	63
MFSEADACELWIDEK	1xCarbamidomethyl [C8]; 1xOxidation [M1]	1	Q01082	0	1859.78	2.74e+06	2	0.14	19.54	63
QYPISLVLAPTR		1	O00571; O15523	0	1357.78	1.23e+06	2	0.31	22.12	63
VVSLEAELQDISSQESKDEASLAK		1	Q92614	1	2576.29	5.70e+06	3	0.42	21.03	63
STPAEDDSRDSQVK		1	Q9UHB6	1	1534.7	2.00e+06	2	0.29	6.6	63
LSSPVLHR		1	Q16643	0	908.53	1.26e+07	2	-0.32	10.12	63
HVLVTLGEK		1	P60660	0	995.59	2.09e+08	2	-0.04	12.17	63
GIYQSLEGAVQAGQLK		2	Q15149	0	1661.89	4.65e+07	2	0.19	19.47	63
GDPLGGVISNYLLEK		1	O43795	0	1574.84	5.24e+06	2	3.03	24.11	63
LHFFMPGFAPLTSR	1xOxidation [M5]	1	Q13885; P04350; A6NNZ2; Q9BUF5; Q3ZCM7; P07437; P68371; Q9BVA1	0	1636.83	2.03e+07	3	-1.1	20.87	63
KMKDTDSEEEIR	1xOxidation [M2]	1	P0DP23	2	1496.69	2.68e+06	3	-0.62	6.48	63
VHGPGIQSGTTNKPNK		3	P21333	1	1634.86	2.46e+07	2	-0.23	6.72	63
HEAMITDLEER	1xOxidation [M4]	2	P35579	0	1359.62	1.42e+07	2	-0.72	10.88	63
IINEPTAAAIAYGLDKK		1	P54652; P11142	1	1787.99	8.61e+06	3	0.26	17.83	63
FESLEPEMNNQASR		1	Q01082	0	1651.74	2.92e+06	2	-1.68	14.12	63
ILNEMRDQYEK	1xOxidation [M5]	1	P02533; Q04695	1	1454.69	2.37e+06	2	-0.77	8.21	63
DVDIIDHHDNTYTVK		1	P21333	0	1784.84	1.14e+07	2	0.03	13.13	63
YYVTIIDAPGHR		2	P68104; Q5VTE0	0	1404.73	3.64e+07	3	0.17	15.98	63
EQADFAIEALAK		2	P35579	0	1305.67	2.11e+08	2	0.37	19.44	62
RDQALTEEHAR		1	P12814	1	1325.66	6.37e+06	3	-0.7	6.49	62
HTAMVSWGGVSIPNSPFR	1xOxidation [M4]	2	P21333	0	1958.95	2.62e+07	2	0.56	19.72	62
VFNPYTEFPEFSR		1	Q9BUP0	0	1632.77		2	1.6	21.87	62
FSDHVALLSVFQAWDDAR		1	Q08211	0	2077.01		3	-0.32	25.89	62
GGAEGELQALR		1	Q15149	0	1100.57	4.20e+07	2	-0.18	13.16	62
RFDSELSQAHEEAQR		1	Q92614	1	1802.84	4.66e+06	3	-0.73	9.28	62
CTELNQAWSSLGK	1xCarbamidomethyl [C1]	1	Q13813	0	1493.71	6.21e+06	2	-3.63	17.14	62
VGWEQLLTTIAR		1	P12814; O43707	0	1386.77	4.02e+07	2	0.35	26.31	62
VAPEEHPVLLTEAPLNPK		35	P60709; P63261	0	1954.06	4.02e+09	2	-0.64	28.74	62
ATENDIYNFFSPLNPVR		1	P31943; P52597	0	1996.98	2.31e+06	3	-1.42	25.33	62
SEISENTDASGK		1	Q9UHB6	0	1237.55	7.71e+06	2	0.08	7	62
ATEPVATSNPAGDPVGSTR		1	Q27J81	0	1826.89	4.69e+06	2	-0.08	11.6	62
AITGFDDPFSGK		1	P15924	0	1254.6	5.85e+06	2	-0.25	18.86	62
AFLTLAEDILR		1	P61026	0	1261.72	1.26e+06	2	2.67	25.97	62
DGLGFCALIHR	1xCarbamidomethyl [C6]	1	P12814	0	1258.64	3.69e+06	2	0.82	19.55	62
LSPEELLLR		1	Q14651; P13796; P13797	0	1069.63	9.89e+06	2	0.21	21.34	62
YGLFPANYVELR		1	Q14247	0	1441.75	1.03e+07	2	-0.38	22.63	62
APILIATDVASR		1	Q92841; P17844	0	1226.71	3.94e+06	2	-0.05	18.08	62
FQPGETLTEILETPATSEQEAEHQR		1	P46940	0	2841.35	1.97e+07	3	0.97	21.82	62
IQLVEEELDR		1	P67936; P09493; P07951; P06753	0	1243.65	7.23e+07	2	0.21	16.48	62
AGQLTSEEDTLSLVTADHSHVFSFGGYPLR		1	P05187; P10696	0	3234.57	3.80e+06	4	0.16	22.42	62
QDEVNAAWQR		1	Q13813	0	1216.57	5.82e+06	2	-0.54	11.37	62
SVVTVIDVFYK		1	Q5D862	0	1269.71	2.61e+06	2	0.86	23.81	62
ENVPPGPEVCITHQEGEK	1xCarbamidomethyl [C10]	2	Q9UHB6	0	2019.94	1.13e+07	2	0.42	12.81	62
QLAEAHAQAK		1	Q15149	0	1066.56		2	0.03	6.49	62
DQAVMISGESGAGK	1xOxidation [M5]	1	O00159	0	1365.63	1.42e+07	2	0.12	9.66	62
LGESQTLQQFSR		1	Q13813	0	1393.71	3.79e+07	2	0.13	14.07	62
FTISEAVLER		1	Q9UPQ0	0	1164.63	1.18e+07	2	0.51	18.92	62
SIQEELQQLR		1	Q15149	0	1243.66	3.56e+07	2	-1.65	16.9	62
IIENAENEYQTAISENYQTMSDTTFK	1xOxidation [M20]	1	P52907	0	3056.37	7.50e+06	3	-2.22	17.33	62
AALVLEDGSVLR	1xAcetyl [N-Term]	1	P27708	0	1284.72	1.08e+06	2	1.48	26.51	62
RQVQSLTCEVDALK	1xCarbamidomethyl [C8]	1	P08670	1	1646.85	3.64e+06	2	0.18	14.2	62
LPVVIGGLLDVDCSEDVIK	1xCarbamidomethyl [C13]	1	Q00610	0	2041.09		2	-0.25	26.39	62
QEQALLEEIER		1	Q15149	0	1357.7	6.23e+06	2	-2.02	17.68	62
LIALLEVLSQK		2	P21333; O75369; Q14315	0	1226.77	6.78e+07	2	0.34	26.5	62
LKDLNSQADSLMTSSAFDTSQVK	1xOxidation [M12]	1	Q13813	1	2502.2	5.60e+06	3	0.16	14.97	62
ALDELFEAIEQK		1	Q27J81	0	1405.72	1.07e+07	2	1.26	23.7	61
NAEQYKDQADK		2	P35579	1	1309.6	1.55e+07	2	-0.12	6.39	61
DGLAFNALIHR		2	Q9H254; O43707	0	1226.66	2.40e+07	2	0.86	19.4	61
TGEEVGFVVDAK		1	O75369	0	1250.63	1.61e+07	2	0.75	15.84	61
INISEGNCPER	1xCarbamidomethyl [C8]	1	P57721; Q15366; Q15365	0	1288.6	2.32e+06	2	-1.05	10.13	61
YKWCEYGLTFTEK	1xCarbamidomethyl [C4]	1	P45880	1	1724.8		2	-0.7	17.79	61
NEIDNYEEDYQK		1	Q01082	0	1559.65	2.09e+06	2	1.07	11.44	61
GIMEEDEACGR	1xCarbamidomethyl [C9]; 1xOxidation [M3]	1	P14923	0	1282.5	1.13e+06	2	-0.57	7.76	61
LMLLLEVISGER	1xOxidation [M2]	1	P12814; Q08043; P35609; O43707	0	1388.78	1.37e+06	2	1.07	25.35	61
SHSPSASQSGSQLR		2	Q8WWI1	0	1428.68	4.20e+06	2	0.56	6.63	61
FTITPSTTQVVGILK		1	P47755	0	1604.93	3.00e+07	2	0.26	22.29	61
VAVTSSSSSSSSSSSIPSAEK		1	Q6WCQ1	0	1971.94		2	1.2	9.94	61
AGNLGGGVVTIER		1	P35268	0	1242.68	3.87e+06	2	0.51	14.64	61
HQGVMVGMGQK	1xOxidation [M]	5	P63267; P60709; P62736; P68133; Q562R1; P68032; P63261	0	1187.57	4.70e+08	2	0.51	8.08	61
NKYEDEINKR		2	P04264; P04259; P02538; P48668; P05787; P13647	2	1308.65	2.20e+08	2	-0.21	7.01	61
QQGLASYDYVR		1	Q15149	0	1299.63	1.93e+07	2	-0.23	13.89	61
TELLNVCMNAK	1xCarbamidomethyl [C7]	1	P15328	0	1292.63	8.82e+06	2	-0.85	16.58	61
KQALQDTLALYK		2	Q01082	1	1391.79	5.77e+06	2	1.45	15.09	61
LQQSHPLSATQIQVK		2	Q13813	0	1677.93	3.30e+07	2	-0.78	12.28	61
QEYDESGPSIVHRK		2	A5A3E0; Q9BYX7; P0CG39; P60709; Q6S8J3; P0CG38; P63261	1	1644.8	6.57e+06	2	1.28	8.72	61
EAVCEVALDYK	1xCarbamidomethyl [C4]	1	Q01082	0	1296.61	1.27e+07	2	-0.26	15.19	61
SFLLDLLNATGK		1	O00571	0	1291.73	3.51e+06	2	0.95	26.63	61
ITDVIIGFQACCR	2xCarbamidomethyl [C11; C12]	2	P35579	0	1552.76	5.55e+07	2	1.57	19.8	61
YLYVDKNFINNPLAQADWAAK		1	P35579	1	2454.25	9.24e+06	3	-1.07	22.01	61
HGIVEDWDLMER	1xOxidation [M10]	1	P61158	0	1515.69	6.39e+06	2	0.38	16.08	61
AVLTVVKDDDHGILDQFSR		1	Q9Y2D5	1	2128.1	6.58e+06	4	1.43	18.53	61
IGNFLNYGSHTGDADGFK		1	Q27J81	0	1912.88		2	-1.17	16.71	61
GMSVSDLADKLSTDDLNSLIAHAHR	1xOxidation [M2]	1	Q16891	1	2682.32	5.54e+06	4	1.52	19.99	61
SFHIFYQLIEGASAEQK		1	Q12965	0	1967.99	2.48e+07	3	3.21	22.04	61
VSMSSQNDGFFAVHLK	1xOxidation [M3]	1	O43795	0	1782.85		2	-2.33	17.17	60
AEAGAGSATEFQFR		1	P46783; Q9NQ39	0	1441.67	2.37e+06	2	-0.38	14.94	60
ANLPQSFQVDTSK		1	P21333	0	1434.72	4.75e+07	2	0.09	15.02	60
SWVNQMESQTGEASK		1	P46940	0	1681.75	1.12e+06	2	-0.75	14.06	60
ALTVPELTQQVFDAK		2	P07437	0	1659.9	3.55e+07	3	-1.68	22.7	60
YTEHSTVGLAQQWDQLDQLGMR		1	Q13813	0	2576.22		3	-0.02	20.66	60
AKDEQSAVSMLK	1xOxidation [M10]	1	Q01082	1	1322.66	5.83e+06	2	-0.65	8.61	60
MDCQECPEGYR	2xCarbamidomethyl [C3; C6]	1	P21333	0	1444.53		2	-0.43	8.9	60
EQADFAVEALAK		1	P35580; P35749	0	1291.65	2.91e+06	2	0.96	17.77	60
LVQSPNSYFMDVK	1xOxidation [M10]	1	Q71UM5; P42677	0	1543.75	4.52e+06	2	-2.27	16.34	60
TALPAQSAATLPAR		1	Q01082	0	1367.76	3.56e+07	2	0.41	14.15	60
LSENVIDR		1	Q9NX63	0	945.5	1.56e+07	2	0.39	11.05	60
RLEAELAAHEPAIQGVLDTGKK		2	Q13813	2	2346.28	8.20e+06	3	0.85	15.81	60
MSQSIIVSGESGAGK	1xOxidation [M1]	1	Q9UM54	0	1466.72	2.56e+06	2	-0.44	11.28	60
QTASVTLQAIAAQNAAVQAVNAHSNILK		1	Q16891	0	2832.53	5.20e+06	3	1.49	21.41	60
ILPVFDEPPNPTNVEESLK		1	Q9NYL9	0	2138.1	8.17e+06	2	-4.32	23.01	60
MWEVLESTTQTK	1xOxidation [M1]	1	Q01082	0	1468.7	7.03e+06	2	0.55	16.14	60
EKEPIVGSTDYGKDEDSAEALLK		2	Q13813	2	2494.22	8.74e+06	3	1.3	15.55	60
YEDEINKR		2	Q7Z794; P35908; P04264; P04259; P02538; Q01546; O95678; P48668; P12035; P05787; P13647	1	1066.52	5.62e+07	2	0.38	6.85	60
MEVENPNYALTSR	1xOxidation [M1]	1	P28290	0	1539.71	1.65e+06	2	-1.61	12.47	60
SLFPENLQADK		1	Q12965	0	1261.64	1.22e+07	2	0.84	17.42	60
SLQEEHVAVAQLR		2	Q15149	0	1479.79	4.60e+07	2	-0.57	12.76	60
LAVNMVPFPR		1	Q13885; Q13509; Q9H4B7; P04350; A6NNZ2; Q9BUF5; Q3ZCM7; P07437; P68371; Q9BVA1	0	1143.63	4.33e+06	2	-0.09	21	60
IEDGISSTLPSK		1	Q86V48	0	1246.65	6.77e+06	2	-0.6	13.39	60
SLESLHSFVAAATK		2	Q15149	0	1460.77	4.97e+07	2	-0.27	17.41	60
NPQSYLYLVK		1	O00159	0	1224.66	5.07e+07	2	0.38	18.31	60
YGGDEIPFSPYR		1	P21333	0	1400.65	9.11e+07	2	-0.6	18.48	60
TDLEKDIISDTSGDFRK		1	A6NMY6; P07355	2	1939.96	2.29e+06	4	2.32	15.56	60
QSVEADINGLR		1	Q2M2I5; P13645; P13646	0	1201.62	6.61e+06	2	-0.63	14.04	60
GCWDSIHVVEVQEK	1xCarbamidomethyl [C2]	1	P47756	0	1685.8	1.54e+07	2	0.16	16.02	59
KYEDEINKR		2	P35908; Q01546; P12035	2	1194.61	7.66e+06	2	0.65	6.74	59
NVQLTENEIR		1	P62136	0	1215.63	6.26e+06	2	2.87	12.58	59
QDQSIILLGSSGSGK		1	Q92614	0	1489.79	3.26e+06	2	1.33	17.3	59
HFYWYLTNEGIQYLR		2	P46783	0	2002.98	1.22e+06	2	-0.43	22.5	59
VPECLYTLPSLR	1xCarbamidomethyl [C4]	1	Q13045	0	1447.76	1.14e+07	2	0.95	20.75	59
YSQKEDKYEEEIK		2	P06753	2	1688.8	6.90e+06	2	0.26	8.08	59
FRCPEALFQPSFLGMESCGIHETTFNSIMK	2xCarbamidomethyl [C3; C18]; 1xOxidation [M29]	3	P60709; P63261	1	3550.63	9.14e+07	3	-0.49	21.97	59
LAAVALINAAIQK		2	P46940	0	1295.8	1.93e+07	2	0.43	22.25	59
RDHALLEEQSK		1	O43707	1	1325.68	9.81e+05	2	0.21	7.42	59
QMEKDETVSDCSPHIANIGR	1xCarbamidomethyl [C11]; 1xOxidation [M2]	2	P47756	1	2303.04	8.86e+06	3	0.14	11.06	59
QLWGLLIEETEKR		2	Q01082	1	1614.88	2.26e+07	2	-0.03	21.68	59
LSTGTTVEDVQK		1	Q86SQ0	0	1277.66	1.42e+06	2	0.12	10.27	59
DTHDQLSEPSEVR		2	Q15149	0	1512.69	2.37e+07	2	0.28	9.67	59
QEQIQAMPLADSQAVR	1xOxidation [M7]	1	Q15149	0	1800.89		2	-0.72	13.6	59
IHFPLATYAPVISAEK		2	P0DPH7; Q6PEY2; Q71U36; P68363; Q9BQE3; P68366	0	1756.96	4.59e+07	2	2.4	21.09	59
CDFTEDQTAEFK	1xAcetyl [N-Term]; 1xCarbamidomethyl [C1]	2	P60660	0	1532.62	5.00e+07	2	0.11	17.07	59
IVLQIDNAR		1	P08727; P05783	0	1041.61	4.61e+08	2	1.32	15.4	59
LLAGEDGTSER		1	Q9UPQ0	0	1147.56	5.83e+06	2	-0.81	9.27	59
SNDPVATAFAEMLK		1	Q9NYL9	0	1493.73	1.51e+07	2	-1.02	24.75	59
NLPIYSEEIVEMYK	1xOxidation [M12]	2	P35579	0	1743.85	9.52e+07	2	0.37	20.26	59
KEEELQAALAR		3	P35749; P35579; Q7Z406	1	1257.68	1.99e+08	2	-0.2	11.43	59
LHFFMPGFAPLTSR		1	Q13885; P04350; A6NNZ2; Q9BUF5; Q3ZCM7; P07437; P68371; Q9BVA1	0	1620.84	4.06e+06	3	0.88	23.63	59
SSLSHAMVIDSR	1xOxidation [M7]	1	Q9Y512	0	1318.64	2.20e+06	2	1.42	9.24	59
ADLINNLGTIAK		1	P07900; P08238; Q58FF8; Q14568	0	1242.71	4.53e+06	2	-0.28	18.81	59
TKPYIQVDIGGGQTK		1	P11021	1	1604.86	1.71e+06	2	-0.42	14.05	59
VLLQEEGTR		1	P15924	0	1044.57	5.86e+06	2	0.47	11.22	59
ISLPLPNFSSLNLR		12	P08670	0	1570.9	8.50e+08	2	0.49	27.72	59
GLQQQNSDWYLK		1	P46940	0	1479.72	1.37e+07	2	1.67	15.72	59
NSASATTPLSGNSSR		1	Q9Y608	0	1449.69	2.77e+06	2	0.06	9.1	59
RYPTAEEILVLGGYLR		1	Q6NYC8	1	1850.02	2.37e+06	3	0.5	23.26	59
VIDRELYQQLQR		1	Q15149	1	1560.85	7.16e+06	2	-0.22	13.98	58
IQQNTFTR		1	P21333; O75369; Q14315	0	1007.53	5.07e+07	2	0.03	9.03	58
VSYDMDGFCER	1xCarbamidomethyl [C9]; 1xOxidation [M5]	1	Q12965	0	1394.54	1.72e+06	2	0.23	11.59	58
EAGAGGLAIAVEGPSK		1	P21333	0	1426.75	5.89e+07	2	0.4	16.33	58
DVAEEIANYRPTLDTLHEQASALPQEHAESPDVR		1	Q01082	1	3801.83	8.91e+06	4	0	18.95	58
LLLPWLEAR		1	Q00610	0	1110.67	3.32e+06	2	1.47	25.64	58
IFYPETTDIYDRK		2	P46940	1	1660.82	1.29e+07	2	0.29	15.88	58
YFPTQALNFAFK		1	P12236; P05141; P12235; Q9H0C2	0	1446.74	1.76e+07	2	0.68	23.63	58
LSVYAALQR		1	Q15149	0	1020.58	2.65e+07	2	0.07	16.55	58
IPPDAYQPYLSPGTPQLEFSAFGAFGK		1	Q8IVT2	0	2898.43	2.72e+06	3	-0.96	26.58	58
LKQVEDEKNSFR		2	P35579	2	1492.78	7.24e+06	3	-0.11	7.86	58
VTLVQTLEIQR		2	Q15149	0	1299.76	3.79e+07	2	-0.07	19.36	58
QLAEEDLAQQR		1	Q15149	0	1300.65	2.19e+07	2	-0.15	11.12	58
LPYDVTPEQALAHEEVK		2	P46940	0	1938.98	2.59e+07	2	-2.25	17.07	58
MEDSVGCLETAEEVKR	1xCarbamidomethyl [C7]; 1xOxidation [M1]	2	P35579	1	1868.84	7.10e+06	2	-0.64	12.07	58
MQHNLEQQIQAR		1	Q13813	0	1495.74	2.36e+06	2	-0.55	9.91	58
LQEEMLQREEAENTLQSFR		2	P08670	1	2351.13	1.28e+07	2	-0.27	16.68	58
LVSIGAEEIVDGNAK		2	O43707	0	1514.81	2.31e+07	2	0.98	17.5	58
YEELQVTAGR		1	P02538; O95678; P48668	0	1165.58	3.69e+06	2	0.51	12.38	58
VETGVLKPGMVVTFAPVNVTTEVK		1	P68104; Q5VTE0	1	2515.38	3.85e+06	3	0.38	22.25	58
FFQTACDVPELQDK	1xCarbamidomethyl [C6]	1	P46940	0	1697.78	8.86e+06	2	-1.2	17.41	58
LEGDSTDLSDQIAELQAQIAELK		1	P35579	0	2487.25	6.73e+06	3	1.1	26.96	58
EDQTEYLEER		1	P07900; P08238; Q58FF6; Q58FF7	0	1311.57	2.02e+06	2	-0.5	11.08	58
HMVFLGGAVLADIMK	2xOxidation [M2; M14]	1	P61160	0	1633.84	1.80e+06	3	2.12	20.2	57
ITENSIVENLKK		1	Q12965	1	1387.78	3.10e+06	2	-2.83	13.56	57
IAQSDYIPTQQDVLR		1	P04899	0	1746.9		2	-0.25	16.93	57
LAGGNDVGIFVAGVLEDSPAAK		1	Q07157	0	2100.1	1.21e+06	3	0.02	25.67	57
GSGGLGGACGGAGFGSR	1xCarbamidomethyl [C9]	1	P04259; P02538; P48668	0	1424.63	1.39e+06	2	0.21	11.45	57
VPDQGAAGVR		1	Q12965	0	969.51	2.92e+07	2	0.19	7.97	57
MLDAEDIVGTARPDEK	1xOxidation [M1]	2	P12814	1	1775.85	8.41e+06	2	-1.68	14.92	57
TLFATEDALEVR		1	O00159	0	1364.71	5.31e+07	2	0.35	19.39	57
AVLVDLEPGTMDSVR		1	P04350; Q3ZCM7; P68371	0	1601.82		2	3.22	20.2	57
VTAQGPGLEPSGNIANK		1	P21333	0	1652.86	4.59e+07	2	-0.41	12.51	57
LLQDFFNGR		1	P0DMV8	0	1109.57	1.69e+06	2	1.06	19.66	57
LALDVEIATYR		1	Q5XKE5; P35908; P04259; P02538; Q01546; O95678; P48668; P12035; P13647	0	1263.69	2.62e+06	2	0.53	20.34	57
LTTPTYGDLNHLVSATMSGVTTCLR	1xCarbamidomethyl [C23]; 1xOxidation [M17]	1	Q13885; P04350; P07437; P68371; Q9BVA1	0	2724.33	6.08e+06	3	-0.1	20.95	57
TRLQQELDDLLVDLDHQR		1	P35579	1	2207.14	1.72e+06	4	-0.1	23.57	57
QALQDTLALYK		1	Q01082	0	1263.69	1.60e+07	2	0.62	17.75	57
VNQPASFAVSLNGAK		1	P21333	0	1502.8	4.49e+06	2	0.42	16.77	57
GRLPLLAVCDYK	1xCarbamidomethyl [C9]	2	Q15149	1	1404.77	1.59e+07	2	-0.18	17.82	57
VKLQEMEGTVK	1xOxidation [M6]	2	P35579	1	1277.68	1.23e+07	2	-0.7	8.24	57
ELSVEEQIKR		2	Q9UHB6	1	1230.67	3.09e+07	2	0.42	11.22	57
AKLEQLFQDEVAK		1	Q15149	1	1518.82	1.63e+07	2	-0.02	16.77	57
DFLAGGIAAAISK		1	P12236	0	1233.68	2.80e+06	2	0.69	22.49	57
AGVLAHLEEERDLK		2	P35580; P35579	1	1579.84	3.09e+07	2	-0.34	13.32	57
IDEPLEGSEDR		1	P61978	0	1259.58	2.37e+06	2	1.16	11.18	57
SCSGVEFSTSGHAYTDTGK	1xCarbamidomethyl [C2]	1	Q9Y277	0	1990.84	1.19e+06	3	2.6	11.1	57
KQEDFMTTMDANEEK	2xOxidation [M6; M9]	2	Q01082	1	1848.76	3.34e+06	2	-1.25	7.68	57
KSDLFQDDLYPDTAGPEAALEAEEWFEGK		1	Q9ULV4	1	3271.5	4.46e+06	3	0.29	25.66	57
IAIYELLFK		1	P46783	0	1109.66	1.01e+07	2	0.71	26.25	57
LKAEAELLQQQK		1	Q15149	1	1398.8	1.90e+07	2	-0.01	11.74	57
EANQQQQFNR		1	Q13813	0	1262.59	6.31e+06	2	-0.32	7	57
VNDTIQIDLETGK		1	P62701	0	1445.75	2.16e+06	2	1.18	17.17	57
LPQLPITNFSR		1	P21333	0	1285.73	8.90e+07	2	0.53	21.37	57
LIQSHPESAEDLQEK		1	Q13813	0	1723.85	4.39e+06	2	-0.18	9.7	57
SGFEPASLKEEVGEEAIVELVENGKK		2	P35579	2	2788.43	2.95e+07	3	-0.2	21.8	57
DCEQAENWMAAR	1xCarbamidomethyl [C2]; 1xOxidation [M9]	1	Q13813	0	1496.59	3.29e+06	2	-0.58	10.99	57
LQEEMLQREEAENTLQSFR	1xOxidation [M5]	2	P08670	1	2367.12	7.97e+07	2	-0.39	15.27	57
CPASEPGLDATTASESR	1xCarbamidomethyl [C1]	1	Q27J81	0	1748.78	1.52e+06	2	-0.07	11.06	57
GYDVIAQAQSGTGK		1	P60842; Q14240	0	1394.69	1.99e+06	2	-1.01	12.76	57
LLGTVIQYGNVIQLLHLK		1	Q14643	0	2022.21		3	0.68	26.8	57
KFVHLLDQSDQDFQEELDLMK	1xOxidation [M20]	2	P46940	1	2594.24	3.24e+06	3	3.88	18.67	57
YLTVAAVFR		1	P04350; P07437; P68371	0	1039.59	1.78e+07	2	-0.06	20.6	57
EAFTNKPNVFTVVTR		1	O75369	1	1722.92	7.11e+06	2	0.18	17.12	57
FEEEIKAEQEER		2	Q96C19	1	1536.72	2.87e+07	2	0.43	9.57	57
LEEEQIILEDQNCK	1xCarbamidomethyl [C13]	2	P35579	0	1760.84	2.40e+07	2	-0.5	15.64	56
SICTTVLELLDK	1xCarbamidomethyl [C3]	1	P27348	0	1391.75	2.56e+06	2	-2.37	25.45	56
MTEEEVEMLVAGHEDSNGCINYEAFVR	1xCarbamidomethyl [C19]; 2xOxidation [M1; M8]	1	P60660	0	3161.35		3	2.53	20.09	56
ADLNQGIGEPQSPSR		1	Q96C19	0	1568.77	8.44e+06	2	-0.65	11.38	56
GESLDNLDSPR		1	Q8WWI1	0	1202.56	4.59e+06	2	-0.12	11.97	56
VDQIQEIVTGNPTVIK		2	P46940	0	1753.97	1.26e+07	2	0.12	19.41	56
GSAASTCILTIESK	1xCarbamidomethyl [C7]	1	Q0ZGT2	0	1437.73	4.31e+06	2	0.27	16.04	56
LDVTILSPSR		1	O75369	0	1100.63	1.70e+07	2	0.47	18.56	56
EQLMASDDFGR	1xOxidation [M4]	1	Q13813	0	1284.55	6.55e+06	2	0.61	11.73	56
CVEDPETGLR	1xCarbamidomethyl [C1]	1	Q15149	0	1175.54	1.13e+07	2	-1.5	10.82	56
NSVSQISVLSGGK		1	O15143	0	1275.69	8.68e+06	2	0.42	14.97	56
ALGQNPTNAEVLK		2	P60660; P14649	0	1354.73	1.77e+08	2	0.6	12.9	56
EYVNASEVSSGKPVSAR		1	O15231	1	1779.89	2.18e+06	3	1.1	10.45	56
AEPEDHYFLLTEPPLNTPENR		2	P61158	0	2482.19	1.32e+07	3	0.52	20.5	56
SPFEVYVDK		1	P21333	0	1083.54	4.41e+07	2	0.22	16.29	56
FNLILR		1	P49411	0	775.48	5.84e+06	2	-1.2	19.21	56
AAMDNSEIAGEK	1xOxidation [M3]	1	Q16891	0	1251.55	9.25e+05	2	-0.38	7.35	56
TAASGIPYHSEVPVSLK		1	Q01082	0	1755.93	2.23e+07	3	0.63	15.84	56
YKGQHVPGSPFQFTVGPLGEGGAHK		3	P21333	1	2595.31	2.11e+07	3	0.3	16.8	56
GAPVGGHILSYLLEK		2	O00159	0	1553.87	5.41e+07	2	0.14	20.91	56
VEQIAAIAQELNELDYYDSPSVNAR		1	P12814	0	2808.37	4.21e+06	3	-0.35	25.36	56
SQIHDIVLVGGSTR		2	P11142	0	1481.81	1.07e+07	2	-0.09	14.72	56
IMGIPEEEQMGLLR		1	P35579	0	1615.82	5.46e+06	2	1.62	21.57	56
KHEAFESDLAAHQDR		1	P12814; P35609; O43707	1	1753.83	4.03e+06	3	0.48	8.43	56
LQDEIQNMKEEMAR	2xOxidation [M8; M12]	2	P08670	1	1766.8	1.56e+08	3	1.26	8.11	56
EVMKPDDDETFAK	1xOxidation [M3]	1	O95425	1	1540.68	6.73e+05	2	0.13	9.11	56
RLTAEDLFEAR		1	Q15149	1	1320.69	4.74e+06	3	0.77	16.49	56
SIATLAITTLLK		1	Q9Y678; Q9UBF2	0	1244.78	3.69e+05	2	0.77	26.37	56
KEDLVFIFWAPESAPLK		1	P23528; Q9Y281	1	1990.07	8.48e+05	3	0.54	25.86	56
VQHASPAGTYAHTVNR		2	P05187; P09923	0	1708.85	2.45e+06	3	0.41	7.39	56
HVAAGTQQPYTDGVR		1	P14923	0	1599.79		2	-0.99	8.91	56
LTEMETLQSQLMAEK	2xOxidation [M4; M12]	1	P35579	0	1783.85	3.18e+07	2	0.43	14.21	56
LTEMETLQSQLMAEK		1	P35579	0	1751.86	8.95e+06	2	0.07	19.47	56
AVTGYKDPYTGQQISLFQAMQK	1xOxidation [M20]	1	Q15149	1	2490.23	7.30e+06	3	-2.98	17.51	56
VKDQEEELDEQAGTIQMLEQAK	1xOxidation [M17]	1	Q92614	1	2548.21	1.73e+06	3	0.86	15.89	56
KGEITGEVR		1	P21333	1	988.54	2.81e+07	2	-1.07	7.23	56
PGSFLLTSTSGR		1	Q96N67	0	1222.64	2.23e+06	2	-1.4	16.65	56
LSYTQLLR		1	Q15149	0	993.57	4.75e+07	2	0.05	17.92	56
ILNPLLDR		1	Q9Y446	0	953.58	4.63e+06	2	-0.36	18.86	56
SGGTALHVAAAK		1	O14974	0	1082.6	2.18e+06	2	0.66	8.51	56
ITDLYTDLR		1	Q01082	0	1109.58	4.00e+07	2	0.4	16.51	56
AEAEAWYQTK		1	Q5XKE5; P08729	0	1196.56	2.21e+07	2	-0.27	12.1	55
IPYLPITNFNQNWQDGK		1	O75369	0	2048.02	8.66e+06	2	2.8	23.76	55
GKDLIGVQNLLK		2	Q13813	1	1297.78	2.72e+07	2	-0.24	18.1	55
AEAGVPAEFSIWTR		2	P21333	0	1533.77	6.47e+07	2	-0.58	21.78	55
GYEEWLLNEIR		1	P12814; P35609; O43707	0	1421.71	1.72e+07	2	-0.67	23.22	55
HITAAEIDTFVSLVR		1	Q14643	0	1671.91	1.05e+06	3	-0.39	22.98	55
AENFFILR		1	P59998	0	1009.55	1.82e+07	2	0.32	20.73	55
KIEDLGAAMEEALILDNK		1	Q13813	1	1973.03	3.76e+06	3	0.13	22.84	55
SAVEAQNEVTENPK		1	Q32MZ4	0	1515.73	1.47e+06	2	-0.15	8.97	55
EQVANSAFVER		1	P08238; Q58FF7	0	1249.62		2	0.27	11.72	55
GVIYFQAIEEVYYDHLK		1	Q86SQ0	0	2087.05	7.20e+05	3	1.82	24.73	55
KIEEIKDFLLTAR		1	P63173	2	1575.91	3.34e+06	3	0.06	18.36	55
AYVAVDGIPQGVLER		1	P16278	0	1586.85	3.15e+06	2	1.23	19.73	55
VGGMHETVLTVTGK	1xOxidation [M4]	1	O95425	0	1444.75	1.87e+06	2	-0.29	11.17	55
QVQVALETAQR		1	Q15149	0	1242.68	2.15e+07	2	0.32	12.66	55
KLPPLPLTLALGAFLNHR		1	O96008	1	1971.19		3	0.56	26.98	55
ELPPDQAEYCIAR	1xCarbamidomethyl [C10]	2	P12814; O43707	0	1561.73	9.07e+06	2	-2.36	14.57	55
EEASDLLLNKK		1	Q12965	1	1259.68	1.65e+07	2	0.07	12.66	55
HISDLYEDLR		1	Q15149	0	1260.62	1.47e+07	2	-0.69	15.22	55
HQAFMAELASNKEWLDKIEK		1	Q01082	2	2388.2	2.02e+06	4	1.4	18.44	55
SAIVHLINYQDDAELATR		1	P14923	0	2029.03	4.49e+06	3	-0.64	17.98	55
LPACVVDCGTGYTK	2xCarbamidomethyl [C4; C8]	1	P61158	0	1540.71	1.30e+07	2	-0.24	13.85	55
GTPAGTTPGASQAPK		1	Q8IVT2	0	1340.68	9.68e+06	2	0.18	8.02	55
FWEVISDEHGIDPTGTYHGDSDLQLER		1	P04350; P68371	0	3116.42	6.84e+06	4	1.58	19.62	55
AVTGYRDPYTEQTISLFQAMK	1xOxidation [M20]	1	Q15149	1	2435.19	5.47e+06	3	0.25	18.81	55
FQIQDISVETEDNK		1	Q01082; O15020	0	1665.8	7.97e+06	2	-0.99	17.5	55
GALALEEKR		1	P35579	1	986.56	4.87e+06	2	-3.53	9.39	55
GGELVYTDSEAR		1	Q15149	0	1296.61	2.53e+07	2	-0.11	11.53	55
VLDNAIETEK		1	Q01082	0	1131.59	3.64e+07	2	0.51	11.3	55
KEASDPQPEEADGGLK		2	P52907	1	1670.79	3.04e+06	2	-0.8	8.52	55
LTSVVTPR		1	Q8WWI1	0	872.52	2.26e+07	2	-0.12	11.22	55
VRPCVVYGGADIGQQIR	1xCarbamidomethyl [C4]	1	O00571; O15523	1	1887.99	1.75e+06	3	0.12	14.94	55
DLMVGDEASELR	1xOxidation [M3]	1	P61160	0	1350.62	1.17e+07	2	1.6	14.88	55
KAALEEVER		1	Q15149	1	1044.57	1.17e+07	2	0.83	8.55	55
LGDLYEEEMR	1xOxidation [M9]	1	P08670	0	1270.56	1.80e+08	2	-0.62	12.44	55
VTMQNLNDR		1	P02533; Q7Z3Y7; P13645; Q7Z3Y9; Q7Z3Z0; Q7Z3Y8; P08779	0	1090.53	1.57e+07	2	0.08	10.12	55
AQAEAQQPTFDALRDELR		2	Q15149	1	2059.02	2.71e+07	2	-0.47	17.36	55
AAANEQLTR		1	Q9NX63	0	973.51	5.85e+06	2	-0.23	7.47	55
ELLLQPVTISR		1	P59998	0	1268.76	1.70e+07	2	-0.59	20.42	55
HTNYTMEHIR	1xOxidation [M6]	2	P12814; P35609; O43707	0	1317.6	1.69e+07	3	-0.4	6.75	55
RQQEELLAEENQR		1	Q15149	1	1642.81	4.40e+06	3	-0.32	9.78	55
CPEALFQPSFLGMESCGIHETTFNSIMK	2xCarbamidomethyl [C1; C16]	1	P60709; P63261	0	3231.46	1.61e+07	3	1.13	24.46	55
FASFIDK		1	Q5XKE5; P08729; Q7Z794; Q7RTS7; Q86Y46; P35908; P04259; P02538; Q01546; O95678; P48668; Q9NSB2; P12035; Q3SY84; Q14CN4; P05787; P19013; P13647	0	827.43	4.62e+08	2	-0.35	15.02	55
RQPQEEVVHEDQGK		1	Q8WWI1	1	1678.81	4.76e+06	3	0.45	6.8	55
ASTPDWVSEGPQPGLR		1	Q8IVT2	0	1696.83	8.33e+06	2	-0.01	16.8	55
LTGVFAPR		1	P22090; Q8TD47; P62701	0	860.5	6.92e+06	2	-0.11	14.69	55
QQVAPTDDETGK		1	Q13813	0	1288.6	5.41e+05	2	-0.62	7.43	55
GLVEDTLR		1	Q15149	0	902.49	4.13e+07	2	-0.52	13.66	55
TPAQYDASELK		1	A6NMY6; P07355	0	1222.6	3.22e+07	2	-0.19	10.95	54
WVWDQEEER		1	Q8WWI1	0	1276.56	1.09e+07	2	-0.6	16.61	54
FDGSPGQAVGEVVAR		2	Q96FS4	0	1488.74	1.95e+06	2	0.45	15.48	54
ADQLTEEQIAEFK	1xAcetyl [N-Term]	2	P0DP23	0	1563.75	8.49e+07	2	2.2	20.73	54
VLIEGSINSVR		1	P59998	0	1186.68	8.04e+06	2	-0.52	15.49	54
LPNNHIGISFIPR		1	O75369	0	1477.83	8.22e+06	3	-0.28	18.35	54
SSQLLWEALESLVNR		1	Q27J81	0	1744.92	1.43e+06	2	-0.45	27.31	54
GFFLFVEGGR		1	P05187; P10696	0	1128.58	2.39e+06	2	-0.42	23.96	54
IVNTQEQLNHR		1	O15020	0	1351.71	1.33e+06	3	0.29	8.04	54
DDSFDSLDSFGSR		1	Q9UPQ0	0	1447.6	1.95e+06	2	0.86	18.39	54
EVVAGSHELGQDYEHVTMLQER		1	Q01082	0	2527.19	2.94e+06	3	-1.61	15.16	54
DELADEIANSSGK		1	P35579	0	1348.62	1.71e+07	2	-0.14	13.73	54
FQIQDISVETEDNKEK		1	Q01082; O15020	1	1922.93	3.13e+06	2	0.17	15.81	54
SQDQFSDMR	1xOxidation [M8]	1	Q8WWI1	0	1129.46	4.45e+06	2	0.06	7.62	54
RQVEEEILALK		1	Q15149	1	1327.76		2	-0.1	15.64	54
MTLGMIWTIILR	2xOxidation [M1; M5]	1	P12814; Q08043; P35609; O43707	0	1479.81	1.02e+07	2	0	27.1	54
YMDVQFDFK	1xOxidation [M2]	1	O00159	0	1208.53	3.38e+07	2	-0.92	17.08	54
FANYIDKVR		2	P08670	1	1125.61	9.08e+06	2	1.22	12.36	54
GSSSATSVSAVPADR		1	O15231	0	1391.68	1.50e+06	2	-1.26	9.75	54
ARFEELNADLFR		1	P54652; P11142	1	1480.75	8.00e+06	3	1.73	18.23	54
MFGGPGTASR	1xOxidation [M1]	2	P08670	0	996.46	1.13e+08	2	-0.82	8.64	54
AMSLVSNEGEGEQNEIR	1xOxidation [M2]	1	Q14573	0	1878.85		2	-0.46	11.62	54
YIELLTR		1	P15924	0	907.52	6.03e+06	2	-0.31	17.23	54
AYTNFDAERDALNIETAIK		1	A6NMY6; P07355	1	2155.07	2.91e+06	2	4.47	19.41	54
RGDLPFVVPR		3	P35579	1	1155.66	2.66e+08	3	-0.42	17.11	54
ETSYGLSFFKPR		1	Q9Y512	1	1431.73	2.73e+06	3	0.98	18.09	54
YMACCLLYR	2xCarbamidomethyl [C4; C5]	1	A6NHL2; Q71U36; P68363; Q9BQE3; P68366	0	1249.55	4.07e+06	2	-0.56	16.97	54
LTTPTYGDLNHLVSATMSGVTTCLR	1xCarbamidomethyl [C23]	1	Q13885; P04350; P07437; P68371; Q9BVA1	0	2708.34	3.04e+06	3	5.01	24.5	54
IKYPENFFLLR		2	P62136; P36873; P62140	1	1439.8	1.33e+07	3	-0.03	21	54
FLEQQNQVLQTK		1	Q7Z794; P35908; P04264	0	1475.79	6.51e+07	2	0.45	13.83	54
NLQNLLILTAIK		1	Q00610; P53675	0	1353.85	2.33e+06	2	0.05	25.93	54
GALQNIIPASTGAAK		1	P04406	0	1411.79	2.02e+07	2	-2	17.28	54
DPYSGSTISLFQAMQK	1xOxidation [M14]	1	Q15149	0	1788.85	1.15e+07	2	0.31	19.44	54
AVEELLECLDLEK	1xCarbamidomethyl [C8]	1	Q92614	0	1560.78	3.23e+06	2	0.21	23.1	54
TAFQEALDAAGDK		1	P10599	0	1336.64	5.65e+06	2	-0.42	15.75	54
SVQTTLQTDEVK		1	O75477; O94905	0	1348.7	1.70e+06	2	-0.07	11.55	53
MISSIVISQMIDENK	2xOxidation [M1; M10]	1	Q96M02	0	1739.86	3.24e+06	2	3.08	17.05	53
IGSMSSVTSNK	1xOxidation [M4]	1	P28290	0	1126.54	5.87e+05	2	0.61	6.94	53
LRECLPLIIFLR	1xCarbamidomethyl [C4]	2	P62701	1	1542.92	2.11e+06	2	-0.71	25.68	53
NHQLYCNDCYLR	2xCarbamidomethyl [C6; C9]	2	Q8WWI1	0	1655.71	8.22e+06	3	0.57	11.43	53
RHEMPPHIYAITDTAYR	1xOxidation [M4]	2	P35579	1	2087.01	2.83e+07	3	-0.81	12.19	53
EKLQEEMLQREEAENTLQSFR	1xOxidation [M7]	2	P08670	2	2624.26	3.75e+07	3	-0.49	14.27	53
DITYFIQQLLR		1	Q9C0K3; Q9P1U1; P61158	0	1409.78		2	0.18	27.62	53
QLLLTPNAVVIVEDAK		3	O00159	0	1723	1.91e+07	2	0.59	24.03	53
IPDWFLNR		1	P62269	0	1060.56	8.56e+06	2	0.56	21.22	53
HLSSCAAPAPLTSAER	1xCarbamidomethyl [C5]	1	Q6IBS0	0	1667.82		2	-0.32	11.48	53
SLEAEILQLQEELASSER		1	P35580	0	2045.04	1.14e+06	3	0.03	26.93	53
TATDEAYKDPSNLQGK		1	Q13813	1	1737.83	2.53e+06	2	-0.4	9.18	53
DSQDAGGFGPEDR		1	Q15149	0	1350.56	1.88e+07	2	0.04	10.36	53
LFIGGLNTETNEK		1	P38159; Q96E39	0	1435.74	1.31e+06	2	3.9	17.69	53
DVEDEETWIR		1	Q13813	0	1291.58	2.90e+07	2	-0.06	16.36	53
VDIQTEDLEDGTCK	1xCarbamidomethyl [C13]	1	O75369	0	1622.72	5.49e+06	2	-0.03	13.32	53
LLPEKHEIENLR		2	Q27J81	1	1490.83	5.54e+06	2	0.01	11.11	53
VAVVNQIAR		1	Q01082	0	969.58	5.47e+07	2	-0.96	12.47	53
LFSFPAAK		1	Q27J81	0	880.49	1.14e+07	2	-0.13	18.12	53
QGEAEFNR		1	O43707	0	950.43	2.24e+06	2	-0.03	7.94	53
ALAVGGLGSIIR		1	Q9BPX5	0	1126.69	1.55e+07	2	0.64	21.1	53
LLQSNPVLEAFGNAK		2	O00159	0	1600.87	5.57e+07	2	0.98	21.73	53
LVILEGELER		1	P67936; P07951	0	1170.67	1.78e+07	2	0.86	18.92	53
QTLENERGELANEVK		1	P35579	1	1729.87	1.36e+07	2	-0.85	10.96	53
VHLENMGSHDIVDGNHR		1	P11277; Q01082; O15020	0	1929.9	1.20e+06	4	-1.18	10.07	53
SRDEIVEMIR	1xOxidation [M8]	1	Q92614	1	1263.64	3.39e+06	2	0.19	11.26	53
LGNIEFKPESR		2	O43795	1	1289.68	1.70e+07	2	-0.54	12.99	53
VASGSDLHLTDIDSDSNR		1	Q92614	0	1901.88	6.78e+05	2	1.12	13.77	53
VLSEDEEDVDFDIIHNANDTFTVK		1	O75369	0	2765.28	1.22e+07	3	0.56	21.17	53
AVCMLSNTTAIAEAWAR	1xCarbamidomethyl [C3]	1	P0DPH7; Q6PEY2; Q71U36; Q9NY65; P68363; P68366	0	1864.9	6.81e+05	3	-0.76	22.37	53
NMITGTSQADCAVLIVAAGVGEFEAGISK	1xCarbamidomethyl [C11]; 1xOxidation [M2]	1	Q05639; P68104; Q5VTE0	0	2925.43		3	2.68	27.14	53
LSQNNFALGYK		1	Q9Y277	0	1254.65	7.35e+06	2	-0.26	15.18	53
SAICIQSWWR	1xCarbamidomethyl [C4]	1	O00159	0	1306.64	8.02e+06	2	-0.24	21.42	53
GVYQYHWQSHNVK		2	Q12965	0	1645.79	1.58e+07	2	0.47	9.97	53
VNSLGETAER		1	Q13813	0	1075.54	2.31e+07	2	-0.85	8.58	53
IADVVLLQK		1	Q14573	0	998.62	5.49e+06	2	-0.02	17.36	53
IIPGFMCQGGDFTR	1xCarbamidomethyl [C7]; 1xOxidation [M6]	1	A0A0B4J2A2; F5H284; Q9Y536; A0A075B759; P62937; A0A075B767	0	1614.74		2	3.31	17.53	53
TQILAASYELHK		2	Q01082	0	1373.74	4.23e+07	2	-0.25	14.3	52
ITGEAFVQFASQELAEK		1	P52597	0	1867.94	7.33e+05	3	-1.56	23.43	52
TKENDAHLVEVNLNNIK		2	Q9NYL9	1	1951.02	1.13e+07	3	0.06	14.75	52
AVVGVVAGGGR		1	P62917	0	941.55	7.54e+06	2	0.23	11.47	52
KVPQVSTPTLVEVSR		2	P02768	1	1639.94	1.33e+07	2	3.53	15.67	52
IAGPGLGSGVR		1	O75369	0	983.56	2.77e+07	2	-0.1	12.18	52
AGFAGDDAPR		25	A5A3E0; P63267; P0CG39; P60709; Q6S8J3; P62736; P68133; P0CG38; P68032; P63261	0	976.45	3.48e+09	2	-0.43	26.13	52
SPGALETPSAAGSQGNTASQGK		1	Q9Y2D5	0	2015.96	6.29e+06	2	-1.77	10.35	52
VPLDEALQR		1	Q15149	0	1040.57	4.95e+07	2	0.05	14.2	52
VFDFLVDSINK		1	Q12965	0	1296.68	6.34e+07	2	0.07	23.48	52
TLTAVHDAILEDLVFPSEIVGK		1	P62081	0	2367.28	3.85e+06	3	-1.44	26.24	52
VAQLEQVYIR		1	P62318	0	1218.68	1.72e+06	2	-0.88	16.12	52
LVASMEEAR	1xOxidation [M5]	1	Q15149	0	1021.5	1.65e+07	2	-0.23	7.66	52
KLVWVPSDK		1	P35579	1	1071.62	8.16e+07	2	-0.71	13.98	52
ETMQSLNDR	1xOxidation [M3]	1	Q92764; P05783	0	1109.49	3.60e+07	2	0.46	6.82	52
TFTAWCNSHLR	1xCarbamidomethyl [C6]	2	P12814; Q08043; P35609; O43707	0	1392.65	1.09e+07	2	-0.86	13.62	52
VELQELNDR		2	P17661; P08670	0	1115.57	2.27e+08	2	0.56	12.71	52
LQLEEER		1	Q9Y608	0	916.47	1.15e+07	2	-0.2	10.46	52
LATQLTGPVMPVR	1xOxidation [M10]	1	P26373	0	1398.78	5.22e+06	2	0.03	15.79	52
LEQYTSAIEGTK		1	Q05682	0	1339.67	9.94e+06	2	-1.09	12.47	52
ISELEGNLQTLR		1	Q96SB3	0	1372.74	3.40e+06	2	-0.52	16.3	52
YLTAEAFGFK		1	Q16658	0	1146.58	1.21e+06	2	0.8	19.62	52
TSAGTTDPEEATR		1	Q14244	0	1335.6	2.51e+05	2	-1.69	7.4	52
QVHPDTGISSK		2	Q16778; Q5QNW6; Q99879; P33778; P58876; Q96A08; Q93079; O60814; Q99880; P62807; P57053; Q8N257; P06899; P23527; Q99877	0	1168.6	2.79e+07	2	-0.15	7.16	52
AGTQIENIDEDFRDGLK		1	O43707	1	1920.93	8.15e+06	3	-2.28	17.1	52
VAQLLER		1	Q15149	0	828.49	4.12e+07	2	-0.39	11.96	52
FVFLLDR		1	Q13045	0	909.52	1.27e+07	2	-0.12	22.21	52
ERNTDQASMPDNTAAQK	1xOxidation [M9]	1	P35749; P35579	1	1892.84		3	-0.67	6.41	52
TVLGTPEVLLGALPGAGGTQR		1	P40939	0	2007.12	6.30e+05	3	0.22	24.77	52
DAVTYTEHAK		1	P62805	0	1134.54	1.55e+07	2	-0.47	7.66	52
LMLLQIK	1xOxidation [M2]	1	O95425	0	874.54		2	-0.51	18.66	52
SKVDQIQEIVTGNPTVIK		1	P46940	1	1969.1		2	0.21	17.83	52
QIATLHAQVADMKK	1xOxidation [M12]	2	P35579	1	1569.84	9.08e+06	2	-0.09	9.07	52
GTQGAEEVLR		1	Q15149	0	1059.54	3.96e+07	2	-0.59	10.42	52
LSEELSGGR		2	Q9P1U1; P61158	0	947.48	1.32e+07	2	-2.34	9.26	52
NTSVVDSEPVR		1	Q0ZGT2	0	1202.6	8.69e+06	2	0.07	10.32	52
DDEEMNTWIQAISSAISSDKHEVSASTQSTPASSR	1xOxidation [M5]	1	Q01082	1	3781.71	2.86e+06	4	-1.15	22.73	52
DTDSEEEIR		1	P0DP23	0	1093.46	9.51e+06	2	-0.43	8.14	52
SLCPETWPTWAGR	1xCarbamidomethyl [C3]	1	O00159	0	1560.73	1.05e+07	2	-1.41	19.97	52
VDDIDDR		1	Q12965	0	847.38	3.31e+06	2	-1.01	7.45	52
LCFEGLR	1xCarbamidomethyl [C2]	1	Q15149	0	894.45	2.28e+07	2	-0.09	16.33	52
MEATGVLPFVR	1xAcetyl [N-Term]; 1xOxidation [M1]	1	Q13045	0	1277.66	5.95e+06	2	0.36	24.11	52
YSVQTADHR		1	Q16658	0	1076.51		2	-0.05	6.98	52
GYYSPYSVSGSGSTAGSR		1	Q15149	0	1782.79	1.04e+07	2	3.88	12.54	52
QLDSIVGER		1	P02538; P48668; P13647	0	1016.54	4.78e+06	2	-0.06	12.88	52
FSTSGLSISGLNPLPNPSYLLPPR		1	Q16352	0	2527.36		3	1.45	26.93	52
TLFSNIVLSGGSTLFK		1	P61163	0	1683.93		2	3.75	26.12	52
AADAEAEVASLNR		1	P06753	0	1316.64	2.80e+07	2	0.01	11.47	52
HTDNVIQWLNAMDEIGLPK	1xOxidation [M12]	1	P46940	0	2210.09	4.76e+06	3	-0.16	22.75	52
KATDAEADVASLNR		1	P09493; P07951	1	1460.73		2	-0.1	10.39	52
LFEDDEHEKEQYCIR	1xCarbamidomethyl [C13]	1	Q9Y2D5	1	2010.89	1.71e+06	4	0.76	11.97	52
EKAEGDVAALNR		1	P67936	1	1272.65	5.97e+06	2	-0.22	8.9	51
MWEVLESTTQTK		1	Q01082	0	1452.7	5.00e+06	2	-0.51	17.99	51
LSLITAPR		1	Q8IVT2	0	870.54	2.19e+07	2	-0.32	16.29	51
AVVQLKPR		1	Q15149	1	910.58	1.77e+07	2	0.24	9.6	51
LFNAIIHR		1	Q15149	0	983.58	1.86e+07	2	0.21	14.93	51
SFYPEEVSSMVLTK	1xOxidation [M10]	1	P11142	0	1632.78	4.88e+06	2	-0.17	18.36	51
GYLNKDTHDQLSEPSEVR		1	Q15149	1	2088	2.85e+06	3	-2.8	10.63	51
NDSFTTCIELGK	1xCarbamidomethyl [C7]	1	Q01082	0	1384.64	1.46e+07	2	1.04	16.96	51
MQEEVVR	1xOxidation [M1]	1	Q15149	0	906.43	3.51e+06	2	-1.23	7.38	51
SPFEVQVGPEAGMQK	1xOxidation [M13]	1	O75369	0	1619.77	9.32e+06	2	-4.61	15.88	51
LLEVLSGER		1	Q01082	0	1015.58	4.44e+07	2	1.5	16.85	51
GFFLLVEGGR		1	P05186	0	1094.6	2.97e+06	2	1.44	23.08	51
EALLGVQEDVDEYVK		1	Q14257	0	1706.85	1.04e+06	2	3.86	20.06	51
ATMQNLNDR	1xOxidation [M3]	1	Q04695; Q9C075	0	1078.49	4.58e+06	2	0.99	6.66	51
LTFEVVNLAR		1	Q14643	0	1161.66	1.82e+06	2	0.85	21.23	51
ATFYGEQVDYYK		1	P46940	0	1483.67	1.38e+07	2	1.49	15.43	51
EAALSTALSEK		1	P02545	0	1119.59	4.36e+06	2	0.95	13.21	51
SESEVEEAAAIIAQRPDNPR		3	Q16643	1	2182.07	3.91e+07	2	-0.19	17.83	51
TWKPTLVILR		2	O15143	1	1226.76	1.90e+07	3	-0.16	19.3	51
DAGQISGLNVLR		1	P38646	0	1242.68	4.59e+06	2	-0.86	18.53	51
ADLTALFLPR		1	Q13045	0	1116.64	1.25e+07	2	-0.12	24.2	51
DAPQDFHPDR		2	P21333	0	1197.53	5.95e+07	2	0.75	8.96	51
KLVIIESDLER		1	P09493	1	1314.76	5.93e+06	3	0.73	15.7	51
VESLQEEIAFLK		1	P08670	0	1405.76	2.23e+07	2	0.38	21.85	51
VEVERDNLAEDIMR	1xOxidation [M13]	2	P08670	1	1704.82	1.84e+08	2	-0.18	13.04	51
GPLINSEFYTGWLDHWGQPHSTIK		1	P16278	0	2783.36	2.04e+06	4	0.15	22.74	51
EREQQIEEHR		2	Q16643	1	1353.65	3.59e+06	2	0	6.33	51
THINIVVIGHVDSGK		2	Q05639; P68104; Q5VTE0	0	1588.88	1.05e+07	3	-0.98	14.69	51
RQQQLTAMK	1xOxidation [M8]	1	P35749; P35579	1	1119.59	6.44e+06	2	0.01	6.43	51
GKLDVQFSGLTK		2	P21333	1	1292.72	4.43e+07	2	-1.42	15.4	51
VLGLVLLR		1	P14678; P63162	0	882.61	1.06e+06	2	0.08	23.05	51
FQNALLVR		1	P02768	0	960.56	2.78e+06	2	0.09	16.01	51
DLGEELEALK		1	P35749; P35579	0	1116.58	8.37e+06	2	1.42	19.78	51
DTDDIESPKR		1	Q9UPQ0	1	1175.55	5.78e+05	2	-2.69	7.32	51
SLFPENLQADKK		1	Q12965	1	1389.74	1.08e+07	2	-0.02	14.78	51
EMEAELEDER	1xOxidation [M2]	1	P35579	0	1266.52	2.60e+07	2	-0.01	8.81	51
VVLPIEAPIR		1	P00403	0	1106.69	3.71e+06	2	0.62	21.13	51
QTPSPDVVLR		1	Q9UPQ0	0	1111.61	4.89e+06	2	1.03	14.55	51
LFTTTEQDEQGSK		1	Q14573	0	1483.69	3.29e+06	2	-0.74	10.59	51
FPVTDAVNK		1	Q15149	0	990.53	5.87e+07	2	2.06	12.66	51
VLGELWPLFGGR		1	P28288	0	1343.75		2	0.97	26.82	51
YEIEETETVTK		1	Q05682	0	1341.64	7.03e+06	2	0.09	11.91	51
KLLEGEECR	1xCarbamidomethyl [C8]	1	Q7RTS7; Q86Y46; P35908; P04259; P02538; Q01546; O95678; P48668; P12036; P13647	1	1133.56	2.57e+06	2	-0.21	8.05	51
ILMVGLDAAGK	1xOxidation [M3]	1	P61204; P18085; P84077; P84085	0	1103.61	4.54e+06	2	1.27	16.42	50
GPDPAAAPYSTQK		1	P28290	0	1302.63	2.61e+06	2	-0.53	9.73	50
YAPTEVGLHEMHIK		1	O75369	0	1624.82	1.83e+06	3	-1.18	13.64	50
VQVQDNEGCPVEALVK	1xCarbamidomethyl [C9]	1	P21333	0	1784.88	2.31e+07	2	0.19	16.83	50
LGFHLPLEVAYQR		2	Q15149	0	1542.84	5.31e+07	3	0.17	21.41	50
SMMQDREDQSILCTGESGAGK	1xCarbamidomethyl [C13]; 2xOxidation [M2; M3]	2	P35579	1	2331.98	1.51e+07	2	-0.24	10.79	50
NVQLQENEIR		1	P36873	0	1242.64	3.33e+06	2	0.22	11.76	50
LQLEATER		1	Q15149	0	959.52	4.84e+07	2	-0.53	11.26	50
EDAANNYAR		1	P0DPH7; A6NHL2; Q71U36; Q9NY65; P68363; Q9BQE3; P68366	0	1023.45		2	1.32	6.89	50
KLLEDR		1	P35579; Q7Z406	1	773.45	3.78e+07	2	-0.46	7.41	50
VTHAVVTVPAYFNDAQR		1	P11021	0	1887.97		2	0.23	16.79	50
NGFEQFCINFVNEK	1xCarbamidomethyl [C7]	1	Q12965; O00160	0	1745.8	1.51e+06	2	-1.87	21.62	50
DSYVGDEAQSKR		2	P63267; P60709; P62736; P68133; P68032; P63261	1	1354.62	2.52e+08	2	-1.27	7.26	50
VQQTVQDLFGR		1	P38646	0	1290.68	5.47e+06	2	0.4	17.18	50
LNCQVIGASVDSHFCHLAWVNTPK	2xCarbamidomethyl [C3; C15]	1	Q06830	0	2753.33	2.90e+06	4	-0.49	19.03	50
LMVHTVATFNSIK	1xOxidation [M2]	1	Q13813	0	1476.79	1.19e+07	3	-0.15	14.78	50
SNYNFEKPFLWLAR		1	P62826	1	1784.91	7.56e+06	3	0.22	22.25	50
ALMGSPQLVAAVVR	1xOxidation [M3]	1	P14923	0	1427.8	3.21e+06	2	-0.87	19.18	50
PGPTPSGTNVGSSGR		1	P60468	0	1370.67		2	2.36	8.36	50
VESLQEEIAFLKK		2	P08670	1	1533.85	1.62e+07	3	0.45	18.92	50
YGGPNHIVGSPFK		2	O75369	0	1372.7	2.25e+07	2	-1.04	13.38	50
LSESQLSFR		1	Q96PK6	0	1066.55	3.21e+06	2	-0.31	14.41	50
QGVSYSVHAYTGQPSPR		1	Q8IVT2	0	1833.89	3.61e+06	3	-0.09	11.55	50
GLDIYVWR		1	Q13045	0	1021.55	5.01e+06	2	0.61	21.13	50
VAEELALEQAK		1	Q9NX63	0	1200.65	1.23e+07	2	-0.22	13.75	50
FLQDCQELSLWINEK	1xCarbamidomethyl [C5]	1	Q01082	0	1922.93	3.56e+06	2	-1.83	22.81	50
LFSWIVNR		1	Q8WXR4	0	1034.58	1.37e+07	2	0	21.7	50
LAEISDVWEEMK	1xOxidation [M11]	1	Q01082	0	1465.69	1.02e+07	2	-0.84	17.91	50
SEVPLVDVTK		1	O43795	0	1086.6	1.79e+07	2	0.5	16.42	50
GWLYYEAGQR		1	Q15149	0	1242.59	1.72e+07	2	0.34	16.77	50
LSVAAQEAAR		1	Q15149	0	1015.55	4.60e+07	2	0.24	9.73	50
SWHNVYCVINNQEMGFYK	1xCarbamidomethyl [C7]	1	Q01082	0	2289.02	2.05e+06	3	-0.88	18.93	50
DLASVQALLR		1	Q13813	0	1085.63	3.40e+07	2	0.73	21.92	50
VMYGFCSVK	1xCarbamidomethyl [C6]	1	Q16643	0	1090.51	4.67e+06	2	0.25	15.12	50
ILYSQCGDVMR	1xCarbamidomethyl [C6]; 1xOxidation [M10]	1	P60660; P14649	0	1357.62	8.24e+07	2	-0.13	11.15	50
KIDGQQTIIACIESHQFQAK	1xCarbamidomethyl [C11]	1	P47755	1	2315.18	7.53e+06	3	1.06	17.58	50
WSQLLANSAAR		1	Q13813	0	1216.64	2.29e+07	2	0.55	14.93	50
VEIIANDQGNR		1	P54652; P11142; P11021; P0DMV8; P34931	0	1228.63	2.01e+07	2	0.05	11.09	50
SMEAEMIQLQEELAAAER		1	P35579	0	2048.96	8.12e+06	3	-1.03	24.76	50
FNWNHCGEMAPACK	2xCarbamidomethyl [C6; C13]; 1xOxidation [M9]	2	P15328	0	1737.69	1.47e+07	2	-1.05	10.88	50
DLEKPFLLPVEAVYSVPGR		1	P49411	1	2129.16	4.09e+06	3	4.2	25.23	50
DNHLLGTFDLTGIPPAPR		1	P11021	0	1934.01	3.50e+06	3	-1.14	22.84	50
GIVDSITGQR		1	P15924	0	1045.56	3.37e+06	2	0.23	14.72	50
IQDKEGIPPDQQR		1	P62987; P62979; P0CG47; P0CG48	1	1523.78	3.50e+05	2	0.35	8.39	50
LLTQHENIKNEIDNYEEDYQK		1	Q01082	1	2636.25	9.79e+06	3	0.12	14.11	50
CLATGPGIASTVK	1xCarbamidomethyl [C1]	1	O75369	0	1274.68	5.37e+06	2	4.02	13.87	50
TFAPEEISAMVLTK		1	P11021	0	1536.8	1.54e+06	2	-0.89	23.01	50
TLSMIEEEIR	1xOxidation [M4]	1	Q9Y2D5	0	1236.61	5.11e+06	2	0.52	15.84	50
APESLFLLEEMR	1xOxidation [M11]	2	Q12965	0	1450.72	2.25e+07	2	0.6	20.93	50
IISNLFLGR		1	Q92614	0	1032.62	9.32e+06	2	0.12	20.46	50
ACPALGLEALQPLQPEPPPEPAFSEAQK	1xAcetyl [N-Term]; 1xCarbamidomethyl [C2]	1	Q9UPQ0	0	3027.51	1.30e+06	3	1.4	27.04	50
LLLPLFR		1	Q9BV86	0	871.58	5.73e+05	2	-0.12	25.13	50
QLEMSAEAER		1	Q15149	0	1163.54	7.09e+06	2	-1.31	10.47	50
LFGAAEVQR		1	Q13813	0	990.54	5.56e+07	2	-1.82	13.3	50
QNLEPLFEQYINNLR		2	P04259; P02538; P48668; P13647	0	1890.97	4.28e+06	2	2.92	25.46	50
AQETGHLVMDVR	1xOxidation [M9]	1	Q8WWI1	0	1371.67	7.59e+06	2	-0.82	9.36	50
SLVPAAELLESR		1	Q15149	0	1284.72	5.73e+07	2	0.06	21.03	50
GAAMIIESLGLCYHLHCFK	2xCarbamidomethyl [C12; C17]; 1xOxidation [M4]	1	Q8WWI1	0	2236.07	2.98e+06	4	1.1	21	50
LLETIDQLYLEYAK		2	P12814	0	1711.92	1.09e+07	2	0.32	24.82	49
YKEENIELAFDDLEPPTDDSVAAVDQASHQSLVR		1	Q92614	1	3801.81		4	0.38	21.31	49
GISQEQMNEFR	1xOxidation [M7]	1	P12814	0	1354.61	7.53e+06	2	0.22	9.98	49
RQAQQERDELADEIANSSGK		1	P35579	2	2245.08	7.33e+06	3	-0.92	10.85	49
TIYPLADLLAR		1	O95425	0	1245.72	2.02e+06	2	0.19	24.85	49
EQLRQEQALLEEIER		1	Q15149	1	1883.98	5.53e+06	2	0.24	18.35	49
LLTSFLPAQLLR		1	P08195	0	1371.84	1.39e+06	2	0.81	26.57	49
IKELQNAGDR		3	Q15149	1	1143.61	1.67e+07	2	-0.04	7.15	49
ELMWLNEKEEEEVGFDWSDR	1xOxidation [M3]	1	Q15149	1	2557.12	2.97e+06	3	-0.94	21.15	49
VILEIDNAR		1	P19012; P13646	0	1042.59	4.90e+07	2	-0.33	15.97	49
QSSPSGSEQLVR		1	O15231	0	1274.63	1.52e+06	2	-1.76	9.46	49
LEDLLQDAQDEK		1	Q15149	0	1416.69	3.42e+06	2	0.74	15.85	49
YQLDPTASISAK		1	P45880	0	1293.67	3.18e+07	2	0.56	15.08	49
SSALVIQSYIR		1	O43795	0	1236.69	1.24e+07	2	0.17	18.96	49
DDETMYVESK	1xOxidation [M5]	1	O15144	0	1232.5	2.90e+06	2	-0.41	9.07	49
WTLLQEQGTK		1	P04259; P02538; P48668; P13647	0	1203.64	7.12e+06	2	0.47	16.64	49
AGVLAHLEEER		2	P35580; P35579	0	1223.64	2.39e+08	2	-0.61	12.77	49
ACGLVASNLNLKPGECLR	1xAcetyl [N-Term]; 2xCarbamidomethyl [C2; C16]	2	P09382	1	2014.02	2.56e+06	2	1.49	20.39	49
QRELEQLGR		1	Q15149	1	1128.61	3.09e+06	2	0.96	9.07	49
SAADEVDGLGVARPHYGSVLDNER	1xAcetyl [N-Term]	1	P46940	1	2569.23	7.86e+06	3	-0.66	17.43	49
ACLISLGYDVENDR	1xCarbamidomethyl [C2]	1	O43707	0	1624.76		2	4.09	19.59	49
SGDAAIVDMVPGKPMCVESFSDYPPLGR	1xCarbamidomethyl [C16]; 2xOxidation [M9; M15]	1	P68104; Q5VTE0	1	3027.39	4.15e+06	3	0.41	19.37	49
KRHEMPPHIYAITDTAYR	1xOxidation [M5]	2	P35579	2	2215.11	1.84e+07	3	-0.29	11.13	49
SPFSVAVSPSLDLSK		1	P21333	0	1533.82	4.89e+07	2	3.07	21.01	49
MHTTFEHDIQALGTQVR		1	Q01082	0	1983.97	4.84e+06	3	-0.41	15.45	49
IGLVRPGTALELLEAQAATGFIVDPVSNLR		1	P15924	1	3120.74		3	0.7	27.07	49
ASREEILAQAK		2	P35579	1	1215.67	1.06e+08	2	-0.45	9.27	49
DLMLWMEDVIR	2xOxidation [M3; M6]	1	Q01082	0	1452.69	8.52e+06	2	0.63	22.17	49
EKLQEEMLQREEAENTLQSFR		1	P08670	2	2608.27	8.74e+06	3	0.39	16.02	49
TVTNAVVTVPAYFNDSQR		2	P11142	0	1982	9.73e+06	2	1.27	19.52	49
SIQFVDWCPTGFK	1xCarbamidomethyl [C8]	1	P68363; P68366	0	1584.75	1.32e+07	2	-0.01	22.52	49
ALEAELAALR		1	Q16352	0	1056.6	3.45e+06	2	-0.12	18.38	49
IVCDLIENK	1xCarbamidomethyl [C3]	1	Q12965	0	1103.58	4.29e+07	2	0.5	14.1	49
TEEQIAAEEAWNETEK		2	Q92614	0	1877.84	3.05e+06	2	-0.81	15.07	49
HQAFMAELASNKEWLDK	1xOxidation [M5]	1	Q01082	1	2033.97	1.25e+06	3	1.96	14.7	49
ERMDDSSVLEATR	1xOxidation [M3]	1	Q9Y2D5	1	1524.7	1.10e+06	2	-0.41	10.1	49
AEISFEDR		1	P21333	0	966.45	2.48e+07	2	0.61	12.6	49
FRELAEEAAR		2	Q15149	1	1191.61	3.05e+07	2	0.27	9.77	49
YTPVQQGPVGVNVTYGGDPIPK		2	P21333	0	2286.18	1.70e+07	2	0.04	18.7	49
AAGSGELGVTMK	1xOxidation [M11]	1	O75369	0	1136.56	6.01e+06	2	-0.24	9.34	49
NVVLQTLEGHLR		1	Q14254	0	1378.78	3.03e+06	3	-0.26	18.33	49
TEVETFVSLVR		1	Q14573	0	1279.69	3.82e+06	2	0.3	21.06	49
TMQNTSDLDTAR	1xOxidation [M2]	1	P14923	0	1368.61	1.04e+06	2	0.19	7.96	49
DLTSWVTEMK		1	Q13813	0	1209.58	3.80e+06	2	0.47	22.08	49
DNTINLIHTFR		1	O15144	0	1343.71	8.21e+06	2	-2.21	17.95	49
EMEAELEDER		1	P35579	0	1250.52	2.04e+07	2	0.22	11.09	49
VLGISPDEQK		1	Q92614	0	1085.58	7.65e+06	2	1.08	13.09	48
LQALDTGWNELHK		2	Q01082	0	1524.78	3.50e+07	2	-0.61	16.11	48
SIITYVVTYYHYFSK		2	Q01082	0	1883.96	3.34e+06	3	-0.75	25.55	48
KLLEATELK		1	Q13813	1	1044.63	1.35e+07	2	1.4	11.73	48
AVLNPTNADILIETK		1	Q14643	0	1611.9	1.32e+06	2	0.89	20.15	48
VFGPGIEGK		1	O75369	0	903.49	1.63e+07	2	-0.93	12.91	48
LKDVLLQVDDERR		3	P35579	2	1598.89	9.48e+07	4	-0.48	13.69	48
TQPMTAQAASYR	1xOxidation [M4]	1	Q96PK6	0	1340.63	1.90e+06	2	-1.5	8.15	48
ATGPAAPPPR		1	O15061	0	934.51	7.87e+05	2	-0.01	7.96	48
VLQVSIGPGLPK		1	Q12965	0	1207.74	6.90e+07	2	0.41	19.23	48
KQITMEELVR	1xOxidation [M5]	1	Q15149	1	1262.68	4.77e+06	2	0	9.95	48
HTNYTMEHIR		1	P12814; P35609; O43707	0	1301.61	5.09e+06	3	-0.4	8.17	48
SMMQDREDQSILCTGESGAGK	1xCarbamidomethyl [C13]; 1xOxidation [M3]	1	P35579	1	2315.99	2.73e+06	3	0.01	11.54	48
RQELEAELAK		1	Q15149	1	1186.64	3.01e+07	2	0.2	10.27	48
DGNASGTTLLEALDCILPPTRPTDKPLR	1xCarbamidomethyl [C15]	2	P68104; Q5VTE0	2	3021.57	9.77e+06	3	2.56	25.61	48
LREQLQLLEEQHR		2	Q15149	1	1691.92	4.16e+07	3	-0.36	13.35	48
MFGGPGTASR		1	P08670	0	980.46	9.24e+07	2	0.64	10.46	48
ILLDVK		1	P02533; Q04695	0	700.46	4.90e+07	2	-0.14	15.6	48
ESNTVFSFLGLKPR		1	Q9UJC5	1	1594.86	1.42e+06	3	0.4	22.35	48
INLFMQFR	1xOxidation [M5]	1	Q14573	0	1084.56	2.88e+06	2	0.81	20.39	48
SVITYVSSIYDAFPK		1	Q9UPN3	0	1689.87	1.03e+06	2	0.39	25.8	48
GQHVPGSPFQFTVGPLGEGGAHK		2	P21333; Q14315	0	2304.15	1.83e+07	4	-0.53	18.37	48
AEQDITTLEQSISR		1	Q9Y608	0	1590.8		2	-0.4	17.16	48
QAYEPCLER	1xCarbamidomethyl [C6]	1	O43795	0	1165.53	5.60e+06	2	0.36	11.4	48
RPPASDGLDLSQAAAR		1	Q16352	1	1624.84	2.08e+06	3	0.24	12.56	48
ELLTTMGDRFTDEEVDELYR	1xOxidation [M6]	1	O14950; P19105	1	2448.12	1.30e+07	3	1.22	18.64	48
LMVALAK	1xOxidation [M2]	1	A6NMY6; P07355	0	761.46	1.36e+07	2	-0.56	13.18	48
FESLEPEMNNQASR	1xOxidation [M8]	1	Q01082	0	1667.73	1.11e+07	2	-0.6	11.81	48
LGDLYEEEMRELR	1xOxidation [M9]	2	P08670	1	1668.79	3.26e+07	3	-0.58	14.18	48
AGSMKDPLLDDHGDFIR	1xOxidation [M4]	1	Q9UM54	1	1902.9	1.48e+06	4	0.29	14.82	48
LYGSAGPPPTGEEDTAEKDEL		1	P11021	1	2175.99	1.65e+06	2	0.3	14.83	48
VKVEPSHDASK		2	P21333	1	1196.63	1.17e+07	2	0.12	6.28	48
RKPVEGYDISFLITNFHTEQMYK	1xOxidation [M21]	1	P59998	2	2832.4	5.60e+06	4	-0.45	19.98	48
DLAQINDLQAQLEEANKEK		1	Q92614	1	2170.1	6.63e+06	3	-0.17	19.31	48
VFIGNLNTLVVK		1	O60812; P07910; B7ZW38; B2RXH8	0	1316.79	3.38e+06	2	-0.39	21.9	48
TSFLLNLR		1	O00159	0	963.56	2.27e+07	2	-0.77	20.58	48
LQEAGILSAEELQR		1	Q15149	0	1556.83	4.91e+07	2	3.34	17.53	48
VAMIDETR	1xOxidation [M3]	1	Q16891	0	950.46	4.03e+06	2	0.78	8.47	48
LAAIGEATR		1	Q15149	0	901.51	3.87e+07	2	-1.46	10.87	48
MQAVQEATR		1	Q15149	0	1033.51	6.39e+06	2	-0.06	8.19	48
VEYTPYEEGLHSVDVTYDGSPVPSSPFQVPVTEGCDPSR	1xCarbamidomethyl [C35]	2	P21333	0	4296.96	8.95e+06	4	0.64	22.28	48
NQGGYGGSSSSSSYGSGR		1	A0A2R8Y4L2; P09651	0	1694.7		2	0.59	7.1	48
AYGPGIEPTGNMVK		1	P21333	0	1433.71	5.72e+06	2	-0.38	14.66	48
VAAYDKLEK		1	P35579	1	1036.57	5.86e+07	2	0.09	8.89	48
TTPSYVAFTDTER		1	P48741; P17066; P54652; P11142; P0DMV8; P34931	0	1487.7	2.47e+07	2	0.22	15.69	48
RMFGGPGTASR	1xOxidation [M2]	2	P08670	1	1152.56	3.38e+07	3	0.67	7.07	48
RPPTMTVSEASYQSER	1xOxidation [M5]	2	Q8WWI1	1	1854.87	3.66e+06	3	-0.34	8.71	47
FLQLLCENHNR	1xCarbamidomethyl [C6]	2	Q14573; Q14571; Q14643	0	1443.72	3.61e+06	2	0.49	16.27	47
IIGNLLYYR		1	P46940	0	1124.65	2.32e+07	2	-0.19	19.62	47
ADQEEQIHPR		2	Q9UHB6	0	1222.58	5.80e+06	2	0.11	6.92	47
KDYEEIGPSICR	1xCarbamidomethyl [C11]	1	P61158	1	1466.69	1.61e+06	2	1.98	12.11	47
HPEAEMAQNSVR	1xOxidation [M6]	1	P14923	0	1384.63		2	-0.9	6.63	47
HIAEEADR		1	P67936; P06753	0	940.45	1.90e+07	2	-0.51	6.39	47
VTYTPMAPGSYLISIK	1xOxidation [M6]	1	P21333	0	1756.92	4.11e+07	2	-0.69	20.77	47
LTSTVMLWLQTNK	1xOxidation [M6]	2	P47756	0	1550.82	1.42e+07	2	0.83	20.33	47
LTSTVMLWLQTNK		1	P47756	0	1534.83	3.63e+06	2	0.86	22.76	47
IISLETYNLLR		1	Q15149	0	1334.77	4.62e+07	2	-0.06	22.28	47
SLQLPASPAPDPSPR		1	Q9Y2H5	0	1532.81	1.48e+06	2	1.33	16.4	47
GASFEELCHNYTQDR	1xCarbamidomethyl [C8]	1	Q92614	0	1826.78		2	-4.31	13.33	47
CITDPQTGLCLLPLK	2xCarbamidomethyl [C1; C10]	1	Q15149	0	1728.9	1.33e+07	2	0.91	23.43	47
EGFESDTDSEFTFK		1	Q8WWI1	0	1638.68	2.44e+06	2	-1.19	17.64	47
STTGPFDREHLLSYLEK		1	Q9NYL9	1	1993		2	-2.35	18.74	47
IIQLLDDYPK		1	P05388; Q8NHW5	0	1217.68	4.82e+06	2	-0.16	19.75	47
YMACCLLYR	2xCarbamidomethyl [C4; C5]; 1xOxidation [M2]	1	A6NHL2; Q71U36; P68363; Q9BQE3; P68366	0	1265.55	1.81e+07	2	0.37	15.26	47
ATLPDADKER		1	P12814	1	1115.57	3.20e+06	2	1.32	7.95	47
REELITNWEQIR		2	Q13813	1	1586.83	3.88e+07	2	-0.53	16.96	47
ISGLIYEETR		1	P62805	0	1180.62	5.19e+07	2	2.64	15.31	47
MNAQGNLDLR	1xOxidation [M1]	1	O95425	0	1147.55	3.38e+06	2	-1.61	10.6	47
HRADHPPAEVTSHAASGAK		1	Q9UHB6	1	1938.95		4	-0.75	6.54	47
NMDPLNDNIATLLHQSSDKFVSELWK		1	P35579	1	3015.49	5.26e+05	4	-1.41	26.11	47
LEASELFK		1	O43795	0	936.5	1.54e+07	2	0.17	16.83	47
SKEQAELEAAR		1	Q15149	1	1231.63	8.32e+06	2	0.02	7.57	47
FDEVLIR		1	O00159	0	891.49	5.23e+07	2	0.01	16.58	47
VLVWDLR		1	O43684	0	900.53		2	-0.44	20.41	47
QKHSQAVEELAEQLEQTK		1	P35579	1	2096.06		3	1.44	15.44	47
LAAEQELIR		1	Q15149	0	1042.59	4.91e+07	2	0.26	14	47
LLEIVER		1	Q12792	0	871.52	2.53e+07	2	-0.46	16.07	47
LLFNDVQTLK		1	Q15149	0	1190.68	4.77e+07	2	0.78	19.4	47
DVNQQEFVR		1	P39019	0	1134.55	3.98e+06	2	1.03	11.67	47
QVLQSTQSPR		1	Q9Y2D5	0	1143.61	5.66e+06	2	0.92	8.47	47
QSGEAFVELGSEDDVK		1	P52597	0	1709.79		2	2.48	16.53	47
YPIEHGIITNWDDMEK		3	P63267; P62736; P68133; P68032	0	1960.91	1.53e+08	2	-1	17.63	47
KHEALMSDLSAYGSSIQALR	1xOxidation [M6]	2	Q13813	1	2193.1	1.17e+07	3	-0.09	16.08	47
TNQELQEINR		1	A6NMY6; P07355	0	1244.62	2.57e+07	2	0.01	10.12	47
LQAEEAER		1	Q15149	0	945.46	1.32e+07	2	-2.18	7.01	47
DVEDEILWVGER		1	Q01082	0	1459.71	2.29e+06	3	-1.01	22.22	47
GFYLFVEGGR		1	P09923	0	1144.58		2	2.75	21.43	47
GYSFTTTAER		26	P60709; P63261	0	1132.53	2.95e+09	2	-0.56	10.91	47
ITVLEALR		1	Q5T9A4; Q5T2N8; Q9NVI7	0	914.57		2	1.33	19.09	46
LLQDSVDFSLADAINTEFK		1	P08670	0	2126.07	2.41e+07	3	0.27	25.79	46
HQALQAEIAGHEPR		1	Q13813	0	1556.79	1.41e+07	3	0.04	9.81	46
PVTEKDLAEDAPWKK		1	O75369	2	1726.9	1.88e+06	3	-1.2	13.24	46
QGFPNR		1	A7E2Y1; P35580; P35749; P35579; Q7Z406	0	718.36	3.90e+07	2	-0.27	8.18	46
RLASTSDIEEKENR		1	O14974	2	1647.83	9.06e+05	3	0.54	7.54	46
EEYLLLR		1	P46940	0	935.52	1.38e+07	2	0.31	17.96	46
KLLEGEESR		2	P08729; P17661; P08670; P41219; P05787	1	1060.56	1.64e+08	2	0.08	7.61	46
YSEAAELR		1	Q9Y2D5	0	938.46	9.46e+06	2	1.91	9.45	46
NMDPLNDNIATLLHQSSDK		1	P35579	0	2126.02	8.68e+06	3	-0.13	21.05	46
IIIAEVVNK		1	O43795	0	998.62	3.18e+07	2	-0.45	16.64	46
DYLLCDYNR	1xCarbamidomethyl [C5]	1	P47756	0	1231.54	3.77e+07	2	-0.01	15.98	46
HEAFESDLAAHQDR		1	P12814; Q08043; P35609; O43707	0	1625.73	1.73e+06	3	-0.46	9.64	46
EGLLLWCQR	1xCarbamidomethyl [C7]	1	P12814; Q08043; P35609; O43707	0	1174.6	1.45e+07	2	0.27	20.8	46
VVPCLVTPVTGR	1xCarbamidomethyl [C4]	1	O75369	0	1297.73	1.15e+07	2	0.18	17.87	46
LTVDEAVR		1	Q15149	0	902.49	8.92e+07	2	-0.12	11.68	46
HLLGVEDLLQK		2	Q01082	0	1264.73	5.67e+07	2	0.22	19.51	46
DMDDEESWIK	1xOxidation [M2]	1	Q13813	0	1283.51	6.87e+06	2	0.62	14.66	46
VMLYPSR	1xOxidation [M2]	1	P18077	0	881.45	3.26e+06	2	-0.29	11.77	46
VEPAVDTSR		1	O75369	0	973.49	1.84e+06	2	0.02	8.51	46
CFSLAATR	1xCarbamidomethyl [C1]	1	Q9NYL9	0	925.46	1.78e+07	2	-0.36	13.66	46
SYVDPSTDER		1	Q15149	0	1168.51	1.97e+07	2	0.39	9.13	46
GRELPTAFDYVEFTR		1	Q13813	1	1800.89	6.73e+06	3	-0.31	19.99	46
ELLPLIYHHLLR		1	Q13428	0	1516.9		4	-1.4	20.69	46
LSEIDVALEGVK		1	Q9BUP0	0	1272.7	7.35e+06	2	0.54	19.3	46
MAPYQGPDAVPGALDYK		1	O43707	0	1792.86		2	-1.21	17.83	46
VTGQFPWSSLR		1	Q9Y512	0	1277.66	6.94e+06	2	1.18	20.1	46
TPNNVVSTPAPSPDASQLASSLSSQK		1	Q8WWI1	0	2583.29	4.56e+06	3	0.56	17.89	46
QEQIDNQTR		1	Q13813	0	1131.54	3.42e+06	2	0.84	6.75	46
RQQQLTAMK		1	P35749; P35579	1	1103.6	3.30e+06	2	-0.39	7.49	46
LFEMVLGPAAYNVPLPK	1xOxidation [M4]	2	Q16891	0	1875.01	6.57e+06	3	0.74	24.19	46
LALETTVLVESYTLPDGR		1	P61160	0	1977.05	1.16e+06	3	1.34	23.67	46
GLPILVELLR		1	Q99569; Q9UQB3	0	1122.72		2	0.35	27.18	46
MQNDTAENETTEKEEK	1xOxidation [M1]	1	Q05682	1	1912.81		3	-0.32	6.41	46
DNLAEDIMR		1	P08670	0	1076.5	3.68e+07	2	0.45	17.79	46
ATQALVLAPTR		1	P60842	0	1140.67	2.68e+06	2	-0.45	15.42	46
LIQEQHPEEELIK		1	Q13813	0	1605.85	1.60e+07	2	5.13	13.1	46
DLTTAGAVTQCYR	1xCarbamidomethyl [C11]	1	Q02543	0	1455.69	2.80e+06	2	0.57	13.83	46
LQLVVLR		1	Q9UDY2	0	840.57	3.05e+06	2	-0.48	19.32	46
VTASGPGLSSYGVPASLPVDFAIDAR		1	O75369	0	2547.31	1.03e+07	3	0.19	25.53	46
VLITTDLLAR		1	P60842; Q14240	0	1114.68	3.61e+06	2	0.54	20.72	46
VVSQYHELVVQAR		1	Q16891	0	1527.83	6.73e+06	2	1.2	12.6	46
MGLAMGGGGGASFDR	2xOxidation [M1; M5]	1	P52272	0	1415.6	6.77e+05	2	-1.92	11	46
REEAAVDAQQQK		1	Q15149	1	1372.68		2	0.03	6.53	46
SAEAELQSK		1	Q15149	0	962.48	1.57e+07	2	0.27	7.49	46
RAQLADSFHLQQFFR		2	Q13813	1	1863.96	6.43e+06	3	0.39	19.37	46
VCSLSNQR	1xCarbamidomethyl [C2]	1	P28290	0	963.47	1.13e+06	2	-0.89	7.19	46
ISEDKNPDYR		1	P14923	1	1236.59		2	2.86	6.88	46
QLLEEELAR		1	Q15149	0	1100.59	2.11e+07	2	0.92	15.41	46
STMMTQEQIQK	2xOxidation [M3; M4]	1	Q9UM54	0	1356.61	8.98e+05	2	-0.31	6.91	46
LLESLDQLELR		1	O95816	0	1328.74	1.51e+06	2	1	21.32	46
AQPSASLGVGYR		1	Q96PK6	0	1205.63	4.29e+06	2	0.65	12.7	46
IWHHTFYNELR		33	A5A3E0; Q9BYX7; P0CG39; P60709; Q6S8J3; P68133; P0CG38; P68032; P63261	0	1515.75	2.33e+09	3	0.84	13.91	46
TSFFQALGITTK		1	P05388; Q8NHW5	0	1313.71	4.30e+06	2	0.21	23.07	46
AVFPSIVGR		28	A5A3E0; P63267; P60709; Q6S8J3; P62736; P68133; P0CG38; P68032; P63261	0	945.55	2.92e+09	2	-0.07	25.49	46
QKEEESQQQAVLEQER		1	Q9UM54	1	1958.94		3	-0.47	8.91	46
ANAEYMSPSGK	1xOxidation [M6]	1	O75431	0	1170.51		2	1.46	6.98	45
VQMEELSK	1xOxidation [M3]	1	Q15149	0	979.48	5.99e+06	2	1.2	7.42	45
NSSYFVEWIPNNVK		1	Q13885; Q13509; P04350; Q9BUF5; P07437; P68371; Q9BVA1	0	1696.83	1.21e+07	2	-1.23	21.83	45
FSSNQPPAAGSSR		1	Q27J81	0	1305.62	4.79e+06	2	1.22	8.02	45
VSGGVDMSSHQEVFASLFHK	1xOxidation [M7]	1	Q27J81	0	2178.03	3.42e+06	3	-0.29	17.3	45
EEELQAALAR		1	P35749; P35579; Q7Z406	0	1129.58	8.19e+06	2	0.42	14.04	45
HWPFQVINDGDKPK		1	P0DMV8	1	1680.85	3.02e+06	3	0.41	15.96	45
ILSSDDYGKDLTSVMR	1xOxidation [M15]	1	Q01082	1	1815.88	4.94e+06	3	-0.03	14.15	45
LLEATELK		1	Q13813	0	916.53	2.38e+07	2	0.12	13.94	45
TELLNVCMNAK	1xCarbamidomethyl [C7]; 1xOxidation [M8]	1	P15328	0	1308.63	2.01e+07	2	-0.04	13.85	45
WVNSHLAR		1	P11277; Q9H254; Q01082; O15020	0	982.52	6.37e+06	2	0.61	9.09	45
LQAAYAGDKADDIQK		1	Q01082	1	1606.81		2	0.49	9.66	45
LPNLLGR		1	Q9Y512	0	782.49	1.32e+07	2	-0.98	17.22	45
VPVDVAYR		1	P58107; Q15149	0	918.5	8.97e+07	2	-0.02	12.57	45
NTLTQTTENLR		1	P15924	0	1290.66		2	-0.17	11.77	45
NDQCYDDIR	1xCarbamidomethyl [C4]	1	Q9ULV4	0	1198.48	4.73e+06	2	-0.74	9.49	45
NIRDDEGFIIR		2	Q9UM54	1	1347.7	7.12e+06	2	0.22	15.41	45
VTIAQGGVLPNIQAVLLPK		2	Q16777; Q7L7L0; P04908; Q93077; Q99878; Q96KK5; Q9BTM1; P20671; P0C0S8; Q6FI13	0	1931.17	4.13e+07	2	0.22	26.33	45
VHSPSGAVEECHVSELEPDK	1xCarbamidomethyl [C11]	1	O75369	0	2206.01	3.32e+06	3	-0.55	10.88	45
LDPHLVLDQLR		3	P35580; P35579	0	1318.75	2.70e+08	2	0.07	19.77	45
LGIPAPSDER		1	Q96M02	0	1054.55	2.19e+06	2	0.49	13.88	45
TVYSHLFDHVVNR		2	Q9UM54	0	1586.81	1.91e+06	3	0.43	15.56	45
SYCAEIAHNVSSK	1xCarbamidomethyl [C3]	1	P62910	0	1465.67	1.09e+06	2	-0.34	9.92	45
IECMLLCEGAAAVLDMVRPK	2xCarbamidomethyl [C3; C7]; 2xOxidation [M4; M16]	1	Q27J81	1	2308.12	1.46e+06	3	1.96	22.77	45
YNPTWHCIVGR	1xCarbamidomethyl [C7]	1	Q96FJ2; P63167	0	1402.67	3.83e+06	2	-1.71	14.16	45
LEDLATLIQK		1	O43795	0	1143.66	9.61e+06	2	0.06	19.75	45
QLPIFCQLILR	1xCarbamidomethyl [C6]	1	Q27J81	0	1400.81	4.16e+06	2	0.19	26.07	45
ACQSIYPLHDVFVR	1xCarbamidomethyl [C2]	1	P61247	0	1704.85		3	-0.18	18.66	45
LQEMEGTVK		1	P35579	0	1034.52	3.74e+07	2	0.17	9.61	45
AEFTVETR		1	P21333	0	952.47	2.76e+07	2	0.06	11.52	45
LSETSIKDR		1	Q9UHB6	1	1048.56	2.19e+07	3	0.62	7.5	45
KQQMLENQMEVR	2xOxidation [M4; M9]	1	Q01082	1	1565.74		2	-1.11	6.95	45
YSGAYGASVSDEELK		1	Q9NX63	0	1575.72	8.61e+06	2	0.17	12.86	45
AQPSVSLGAPYR		1	Q96PK6	0	1245.66	2.94e+06	2	-1.47	14.31	45
DADETKEWIEEK		1	Q13813	1	1492.68	8.98e+06	2	-0.39	12.51	45
LTEGCSFR	1xCarbamidomethyl [C5]	1	Q71UM5; P42677	0	969.45	3.82e+06	2	0.07	9.64	45
ASLPLPCAIAQSR	1xCarbamidomethyl [C7]	1	Q96M02	0	1383.74	5.53e+06	2	-0.38	19.05	45
STLNEIYFGK		1	P47756	0	1171.6	1.06e+08	2	-0.27	17.24	45
EFNKYDTDGSK		1	P61158	1	1303.58	1.58e+06	2	-0.63	7.32	45
NPIMSQCFDR	1xCarbamidomethyl [C7]; 1xOxidation [M4]	1	O00159	0	1283.55	1.88e+07	2	-0.58	11.16	45
VNQPASFAIR		1	O75369	0	1102.6	2.10e+07	2	0.35	14.3	45
LLASQLEEIK		1	Q86V48	0	1143.66	9.06e+06	2	0.91	16.92	45
VANVELYYR		1	Q00610	0	1126.59	2.21e+06	2	0.13	14.94	45
FLNDTSLPHSCFR	1xCarbamidomethyl [C11]	1	O43795	0	1593.75		3	0.19	15.51	45
LPLDKEPAR		1	Q15149	1	1038.59	7.16e+06	2	-0.29	9.42	45
YGGELVPHFPAR		2	O75369	0	1342.69	2.88e+07	2	2.26	16.14	45
MGTPDPEYPDDYSQGGTR	1xOxidation [M1]	1	P05187	0	2001.81		2	-0.87	11.62	45
ETAELSETLTR		1	Q6NYC8	0	1249.63	6.01e+06	2	-2.18	13.24	45
RGLDVNKCEIAR	1xCarbamidomethyl [C8]	1	Q9ULV4	2	1430.75	1.61e+06	3	-0.08	9.16	45
FLSAIVSSVDK		1	P46940	0	1165.65	7.52e+06	2	0.6	18.62	45
RPLGNFTAPPTYTETLSTAPLASWVR		1	Q8N3V7	1	2846.48	4.81e+06	3	2.59	23.44	45
EKQLAAENR		1	P35579	1	1058.56	2.41e+06	2	-0.36	6.4	45
IVAEEFLK		1	P59998	0	948.54	2.53e+07	2	0.22	17.21	45
NMDPLNDNIATLLHQSSDKFVSELWK	1xOxidation [M2]	1	P35579	1	3031.48	8.52e+06	3	-0.91	25.31	45
RIQLVEEELDRAQER		1	P67936; P09493; P07951; P06753	2	1883.99	5.24e+06	3	-0.38	14.01	45
HEVEKSEISENTDASGKIEK		1	Q9UHB6	2	2230.08	1.39e+06	4	-0.53	7.73	45
AVFPSIVGRPR		36	A5A3E0; P63267; P60709; Q6S8J3; P62736; P68133; P0CG38; P68032; P63261	1	1198.71	2.25e+09	2	1.11	29.38	44
NMGAHAVVLELLQIPYEK	1xOxidation [M2]	1	Q14643	0	2041.08	1.08e+06	3	0.62	23.9	44
EDLLQEYTEQR		1	O95425	0	1423.67	5.44e+06	2	-0.17	17.29	44
VVIVDPETGK		1	Q15149	0	1056.59	7.29e+06	2	0.93	13.44	44
HEMPPHIYAITDTAYR		1	P35579	0	1914.92	5.25e+06	3	-0.62	14.76	44
YCYLQNEVFGLFQK	1xCarbamidomethyl [C2]	1	P15924	0	1808.87	1.04e+06	2	-2.64	24.56	44
SLTNDWEDHLAVK		2	P07900; P08238	0	1527.74	5.16e+06	2	0.42	16.36	44
LYSVSYLLK		1	P21333	0	1085.62	5.21e+07	2	0.18	20.02	44
RYASGSSASLGGPESAVA		1	Q15149	1	1666.8	3.34e+06	2	-1.44	12.48	44
IYGFYDECK	1xCarbamidomethyl [C8]	1	P62136; P36873; P62140	0	1194.51	9.21e+06	2	0.01	15.08	44
CDVDIR	1xCarbamidomethyl [C1]	2	P60709; Q562R1; P63261	0	777.36	5.89e+08	2	0.21	9.09	44
FVNWQVDGEYR		1	O96008	0	1412.66	4.45e+06	2	4.24	16.97	44
TYGEPESAGPSR		1	P50402	0	1250.56	1.05e+06	2	-2.75	8.3	44
KLSDDNTIGKEEIQQR		1	Q13813	2	1873.96	1.18e+06	3	1.57	9.18	44
AHVVPCFDASK	1xCarbamidomethyl [C6]	2	P21333	0	1230.59	4.94e+07	2	-0.31	11.61	44
MMLDQCLELQLFHR	1xCarbamidomethyl [C6]; 2xOxidation [M1; M2]	1	Q13813	0	1865.87	3.75e+06	3	-0.18	20.11	44
AGNNMLLVGVHGPR		1	P21333	0	1434.76	7.13e+06	3	0.07	15.37	44
DVNAAIATIK		1	P0DPH7; Q6PEY2; Q71U36; P68363; Q9BQE3	0	1015.58	1.71e+07	2	0.9	15.48	44
DAVLLLFANK		1	P18085	0	1103.65	2.03e+06	2	2.43	24.17	44
RVAMIDETR	1xOxidation [M4]	1	Q16891	1	1106.56	2.36e+06	2	-0.52	7.27	44
NQYVPYPHAPGSQR		2	Q12965	0	1613.78	6.53e+07	2	1.66	11.59	44
VSYDMDGFCER	1xCarbamidomethyl [C9]	1	Q12965	0	1378.54	2.90e+06	2	0	15	44
YTPTQQGNMQVLVTYGGDPIPK	1xOxidation [M9]	2	O75369	0	2423.19		2	1.04	17.88	44
IDIVENR		1	P00966	0	858.47	4.53e+06	2	-0.3	11.4	44
KQEALVAR		1	Q13813	1	914.54	7.22e+06	2	-2.13	7.23	44
YMDLAENAR	1xOxidation [M2]	1	Q69YQ0	0	1098.49	1.77e+06	2	-0.76	9.28	44
KLVIIEGDLER		2	P06753	1	1284.75	3.39e+07	2	1.1	15.81	44
IFAQDGEGQR		1	O75369	0	1120.54	1.18e+07	2	0.19	9.18	44
CSGPGLSPGMVR	1xCarbamidomethyl [C1]	1	P21333	0	1217.58	3.11e+06	2	-0.56	13.53	44
VGLGLGYLELPQINYK		2	Q13045	0	1776.99	7.81e+06	2	1.02	25.79	44
FAEQTLR		1	Q15149	0	864.46	3.81e+07	2	-0.72	10.16	44
LLVSASQDGK		1	Q9HAV0; P62873; P62879; P16520	0	1017.56	6.15e+06	2	-0.98	10.69	44
EKLEAYQHLFYLLQTNPTYLAK		1	P46940	1	2683.41	5.90e+06	4	0.72	23.5	44
LKPKPIDVQVITHHMQR	1xOxidation [M15]	2	P61158	2	2056.15	4.95e+06	4	-0.28	10.92	44
YPENFFLLR		1	P62136; P36873; P62140	0	1198.63	3.83e+06	2	1.85	22.7	44
LTVMSLQESGLK	1xOxidation [M4]	1	O75369	0	1321.7	3.43e+06	2	0.55	15.59	44
IIAPPER		36	P63267; P60709; P62736; P68133; Q562R1; P68032; P63261	0	795.47	4.11e+09	2	-0.35	24.54	44
DGQVINETSQHHDDLE		3	P08670	0	1836.8	1.95e+08	2	-0.72	10.17	44
DISEASVFDAYVLPK		1	P62854	0	1653.84	3.27e+06	2	-0.71	24.04	44
FPYVALSK		1	P05187; P10696	0	924.52	7.11e+06	2	0.11	17.53	44
KAVDEAADALLK		1	Q16891	1	1243.69	2.16e+06	2	0.21	13.84	44
LALDIEIATYR		1	P08729; P14136; Q6KB66; P05787; P19013	0	1277.71	1.22e+07	2	0.12	21.74	44
LLWTTSR		1	P14923; P35222	0	876.49	4.08e+06	2	0.26	15.84	44
ESTLHLVLR		2	P62987; P62979; P0CG47; P0CG48	0	1067.62	2.01e+07	2	0.46	15.43	44
EQADYCVSHMKPYVDGK	1xCarbamidomethyl [C6]; 1xOxidation [M10]	2	Q13813	1	2042.89	2.37e+06	3	-0.15	9.07	44
KHQILEQAVEDYAETVHQLSK		1	Q01082	1	2466.26	3.74e+06	4	-1.67	18.84	44
LFTTVRPLIEVQLSEEQIR		1	Q92614	1	2271.27	2.37e+06	3	3.02	22.06	44
AGVNTVTTLVENKK		1	P62424	1	1473.83		3	1.01	13.49	44
QKGDVVLQSDHVIETLTK		1	O00159	1	2010.09	8.06e+06	3	0.54	16.21	43
NLDLDSIIAEVK		1	Q5XKE5; P35908; P04259; P02538; O95678; P48668; P13647	0	1329.73	2.22e+07	2	1.64	24.53	43
LGIYTVLFER		1	Q02978	0	1210.68	4.58e+05	2	0.2	24.13	43
TVTAMDVVYALKR	1xOxidation [M5]	1	P62805	1	1482.8	2.24e+06	3	0.32	17.04	43
LPSNVAR		1	Q27J81	0	756.44	9.60e+06	2	0.57	8.48	43
WQAVLAQTDVR		1	Q15149	0	1286.69	4.34e+07	2	0.24	16.25	43
SPDSATVSGYDIMK	1xOxidation [M13]	1	Q6WCQ1	0	1486.67	1.98e+06	2	-0.89	12.19	43
IIEDLR		1	Q96J66; P05783	0	758.44	7.40e+08	2	0.62	11.73	43
AAQALALLR	1xAcetyl [N-Term]	1	Q16401	0	968.59		2	0.37	26.25	43
EDQSILCTGESGAGK	1xCarbamidomethyl [C7]	1	P35580; P35749; P35579; Q7Z406	0	1551.7	2.30e+07	2	-1.44	11.93	43
VANVSLLALYK		1	P62266	0	1190.71	4.78e+06	2	0.57	21.13	43
MDCQETPEGYK	1xCarbamidomethyl [C3]; 1xOxidation [M1]	1	O75369	0	1373.53		2	0.03	8.03	43
ALSSEGKPYVTK		1	Q13813	1	1279.69	1.17e+07	2	-1.52	8.6	43
VSEEAESQQQWDTSK		1	Q01082	0	1751.77		2	1.76	9.68	43
LSPFMADIR	1xOxidation [M5]	1	P21333	0	1065.54	5.46e+07	2	0.32	16.69	43
ADIEMPFDPSK	1xOxidation [M5]	1	O75369	0	1265.57	9.25e+06	2	-3.96	14.7	43
ANLSLLR		1	P23246	0	786.48	1.59e+06	2	-1.26	15.47	43
SSAIVEIFSK		1	Q9UHB6	0	1080.59	1.08e+07	2	0	19.67	43
LEINFEELLK		1	Q0ZGT2	0	1247.69	1.17e+06	2	1.45	25.25	43
QSSSTNYTNELK		1	Q9UHB6	0	1371.64	1.54e+07	2	-0.05	9.95	43
LFEYGGFPPESNYLFLGDYVDR		1	P62136; P36873	0	2598.22		3	0.44	27	43
LAWVSHDSTVSVADASK		1	Q92747	0	1772.88	2.13e+06	3	-0.23	14.58	43
HVGNQQYNVTYVVK		1	O75369	0	1648.84	8.70e+06	3	-0.09	12.49	43
NLLDEELQR		1	Q15149	0	1129.58	3.43e+07	2	-0.12	16.28	43
LEEQAAQHK		1	Q15149	0	1053.53		2	0.28	6.08	43
KIQDLAIR		1	Q92614	1	956.59	3.20e+06	2	-0.46	11.59	43
QKHSQAVEELAEQLEQTKR		1	P35579	2	2252.16	6.68e+06	4	0.34	14.15	43
ASIHEAWTDGK		1	P12814; O43707	0	1214.58	6.23e+06	2	0.18	10.02	43
TPLHNDNSWIR		1	Q8WWI1	0	1352.67	5.30e+06	2	0.46	12.46	43
LAEVEAALEK		1	Q15149	0	1072.59	3.62e+07	2	0.3	14.22	43
NQCTQVVQER	1xCarbamidomethyl [C3]	1	P15924	0	1261.6	1.25e+06	2	0.99	7.98	43
RLAAVALINAAIQK		1	P46940	1	1451.91	4.64e+06	3	-0.37	19.58	43
NFGSYVTHETK		1	Q96FJ2; P63167	0	1282.61	6.32e+06	2	-0.95	10.14	43
EKLEEEENLTR		1	Q86V48	1	1389.69	2.52e+06	2	1.13	9.37	43
VSFELFADK		1	P62937	0	1055.54	1.24e+06	2	2.34	20.43	43
EAFQLFDR		1	P60660	0	1025.51	1.36e+08	2	0.34	18.8	43
AHEEQLKEAQAVPATLPELEATK		1	Q15149	1	2503.3		4	-0.39	16.31	43
ALAAAGYDVEK		1	P16402; P10412; P16403; Q02539; P22492	0	1107.57	7.90e+06	2	6.81	11.95	43
ALTVPELTQQMFDAK		1	Q13509; P04350; P68371	0	1691.87	1.64e+06	2	1.63	23.02	43
FEHCNFNDVTTR	1xCarbamidomethyl [C4]	1	P13987	0	1539.66	2.14e+06	2	-0.89	10.78	43
LTVEEAVR		1	Q15149; Q9UPN3	0	916.51	6.07e+07	2	-0.68	12.11	43
VGVLAASMEAK	1xOxidation [M8]	1	Q9UHB6	0	1091.58	7.97e+07	2	1.4	11.43	43
GLQDSIR		1	P15924	0	788.43	3.31e+06	2	0.98	10.24	43
SPWSNKYDPPLEDGAMPSAR	1xOxidation [M16]	1	P47756	1	2234.02	1.69e+06	2	0.15	14.69	43
LEEQRDEQTSR		1	Q92614	1	1390.66		2	-0.63	6.26	43
RQVQSLTCEVDALKGTNESLER	1xCarbamidomethyl [C8]	1	P08670	2	2533.27		3	-0.24	14.93	43
VIQCFAETGQVQK	1xCarbamidomethyl [C4]	1	Q00610	0	1507.76	1.47e+06	2	3.26	12.85	43
ENWGPWSAGGSR		1	Q12965	0	1303.58	2.12e+07	2	0.03	16.17	43
LILFPR		1	P26373	0	758.49	1.13e+07	2	-0.44	19.67	43
MVEGYQGLR	1xOxidation [M1]	1	Q15149	0	1068.51	1.89e+07	2	-0.96	10.79	43
TFCQLILDPIFK	1xCarbamidomethyl [C3]	1	P13639	0	1494.8	1.70e+06	2	-0.46	26.08	43
AQYEDIANR		1	O95678; P05787	0	1079.51	2.90e+08	2	0.14	9.51	43
FLQEEAEK		1	Q15149	0	993.49	2.89e+07	2	0.99	9.7	43
LLLWSQR		1	Q15149	0	915.54	3.32e+07	2	-0.27	18.8	43
LLSVEGSTLR		1	O00159	0	1074.62	7.93e+07	2	0.62	15.05	43
KSESEVEEAAAIIAQRPDNPR		2	Q16643	2	2310.17	2.66e+07	3	-0.63	15.68	43
FAVFIEK		1	Q16352	0	853.48	2.80e+06	2	0.05	17.92	43
GLLSAEVAR		1	Q15149	0	915.53	5.34e+07	2	-1.14	14.39	43
SSEELLSALQK		1	Q9UM54	0	1204.64	6.80e+06	2	-1.27	17.5	43
SEDPTTPEPSPAAPSPAPR		1	Q96M02	0	1903.9		2	-1.01	11.99	43
LGNFFSPK		1	P46940	0	909.48	1.43e+07	2	0.02	16.52	43
ISNFLLEK		1	Q12965; O00160	0	963.55	5.90e+07	2	-4	17.45	43
AKQTLENER		1	P35579	1	1088.57	5.66e+05	2	-0.07	6.34	43
ISNRPAFMPSEGK	1xOxidation [M8]	2	P35609	1	1449.72	9.55e+06	2	-0.99	9.48	43
LFDQAFGLPR		1	P04792	0	1163.62	3.06e+06	2	0.84	20.89	43
SLAAEEEAAR		1	Q15149	0	1046.51	3.93e+07	2	1.17	8.93	43
LTFDTTFSPNTGK		1	P45880	0	1428.7	2.15e+07	2	-0.97	17.55	42
GATYPSEIPKEDSTTFAK		2	Q8WWI1	1	1941.94	1.71e+07	2	-1	13.53	42
EQWLNNMQIPEKLEDLEVIQHR	1xOxidation [M7]	1	Q01082	1	2778.39	2.71e+06	4	1.9	20.1	42
VLAVNQENEHLMEDYEK		1	O43707	0	2060.96	2.11e+06	3	-0.01	14.6	42
CPEALFQPSFLGMESCGIHETTFNSIMK	2xCarbamidomethyl [C1; C16]; 1xOxidation [M]	3	P60709; P63261	0	3247.46	7.82e+07	3	0.36	23.12	42
ALQALEELR		1	Q15149	0	1042.59	3.65e+07	2	-1.73	16.94	42
YQIDPDACFSAK	1xCarbamidomethyl [C8]	1	P21796	0	1414.63	6.04e+06	2	-1.7	15.46	42
SAATLITHPFHVITLR		1	Q9Y6C9	0	1777.01	3.31e+06	3	1.08	18.88	42
LDILDQER		1	Q13813	0	1001.53	5.74e+06	2	1.01	15.37	42
AADFQLHTHVNDGTEFGGSIYQK		1	Q9Y277	0	2535.19	3.30e+06	3	-0.74	15.31	42
EVDEQMLNVQNK	1xOxidation [M6]	1	Q13885; P07437; P68371; Q9BVA1	0	1462.68	7.60e+06	2	0.1	10.11	42
KLVIIEGDLERTEER		1	P06753	2	1799.99	2.82e+06	3	-1.48	14.35	42
EIGQSVDEVEK		1	Q01082	0	1232.6	3.08e+07	2	-0.38	10.49	42
DSYVGDEAQSK		5	P63267; P60709; P62736; P68133; P68032; P63261	0	1198.52	1.42e+09	2	0.43	7.99	42
VSASLPR		1	Q8WWI1	0	729.43	2.95e+07	2	-0.03	10.16	42
LGMDGYR	1xOxidation [M3]	1	P61626	0	827.37	8.96e+05	2	-0.13	7.91	42
KSIQSGPLK		1	Q16891	1	957.57	2.20e+06	2	0.05	7.53	42
GRPSLYVQR		1	Q8IVT2	1	1075.6	8.62e+06	2	0.5	9.47	42
QVDQLTNDK		1	P08670	0	1060.53	1.17e+08	2	0.55	8.19	42
IDTIEIITDR		1	P22626	0	1188.65	5.52e+06	2	-3.61	18.87	42
ERGDYVLAVK		1	O75369	1	1149.63	6.10e+06	2	-1.26	12.21	42
IMGIPEEEQMGLLR	2xOxidation [M2; M10]	2	P35579	0	1647.81	1.36e+08	3	0.09	17.08	42
IDGATQSSPAEPK		1	Q32MZ4	0	1300.64	1.68e+06	2	-1.56	8.15	42
AEAELCAEAEETR	1xCarbamidomethyl [C6]	1	Q7Z406	0	1478.64		2	0.07	10.93	42
KYVATLGVEVHPLVFHTNR		1	P62826	1	2180.2	2.75e+06	4	-1.38	16.59	42
SPLVFSSCVHLR	1xCarbamidomethyl [C8]	1	Q96M02	0	1401.73	6.38e+06	3	2.1	17.07	42
SSEEIESAFR		1	Q13813	0	1154.53	3.09e+07	2	0.41	13.37	42
KLETAVNLAWTAGNSNTR		1	P21796	1	1946.01	2.99e+06	3	0	16.53	42
EKLQEEMLQR	1xOxidation [M7]	2	P08670	1	1319.66	6.23e+07	2	0.39	8.4	42
NPIMSQCFDR	1xCarbamidomethyl [C7]	1	O00159	0	1267.56	3.86e+06	2	0.12	13.86	42
EAFNMIDQNR		1	P24844; O14950; P19105	0	1237.56	1.85e+07	2	-1.15	14.37	42
FNEVVSVLK		1	Q9UM54	0	1034.59	3.29e+06	2	-0.25	17.36	42
HNKPEVEVR		1	P59998	1	1107.59	1.12e+07	3	0.62	6.71	42
CIQMWFDPAQGNPNEEVAR	1xCarbamidomethyl [C1]; 1xOxidation [M4]	1	P15328	0	2278	2.86e+06	3	1.53	19.25	42
WAAQTIR		1	O00159	0	845.46	3.76e+07	2	-0.72	11.15	42
LEHLSVSHNNLTTLHGELSSLPSLR		1	Q13045	0	2754.45		3	-0.06	17.8	42
QALHEAVEMDR	1xOxidation [M9]	1	P05186	0	1314.61	7.72e+05	2	1.09	7.74	42
KWEQQLQEEQEQK		1	Q8WWI1	1	1730.83	1.45e+06	2	0.56	9.44	42
EDCEQWWEDCR	2xCarbamidomethyl [C3; C10]	1	P15328	0	1612.58	6.62e+06	2	-0.06	15.7	42
MSLLQLVEILQSK		2	O00159	0	1501.87	7.12e+05	2	0.37	27.36	42
FNDEHIPESPYLVPVIAPSDDAR		1	O75369	0	2581.26		3	-1.24	21.57	42
DVDEIEAWISEK		1	Q13813	0	1433.68	1.42e+07	2	1.04	22.6	42
LQVFLR		1	Q14573	0	775.48	8.41e+06	2	-0.57	16.96	42
ATWPSWQGEEK		1	Q12965	0	1318.61	3.30e+07	2	0.1	15.69	42
IDQLEGDHQLIQEALIFDNK		1	P12814	0	2339.19	7.44e+06	3	0.53	21.92	42
EASELLR		1	O00159	0	817.44	3.49e+07	2	-0.54	11.15	42
IQTQPGYANTLR		1	Q00325	0	1361.72	4.46e+06	2	0.46	11.99	42
REDMAPHIYAVAQTAYR	1xOxidation [M4]	1	Q92614	1	2007.97	2.65e+06	3	-1.05	13.13	42
ITITNDQNR		1	P11021	0	1074.55	5.76e+06	2	0.52	9.09	42
EIIDLVLDR		1	Q71U36; P68363; Q9BQE3	0	1085.62	2.35e+07	2	0.51	22.27	42
IQAEVEAQLAR		1	Q9UM54	0	1227.67	5.96e+06	2	0.25	13.55	42
HRPELIEYDK		2	O43707	1	1299.67	1.72e+07	2	0.05	9.85	42
SGSLSLTQFADMISLK	1xOxidation [M12]	1	P15924	0	1713.87	1.91e+06	2	0.76	23.58	42
YQAAVSK		1	Q9UHB6	0	766.41	1.02e+07	2	-0.52	6.89	41
APGIIPR		1	P25705	0	723.45	2.24e+06	2	0.47	12.61	41
ETGEHLVHVK		1	P21333	0	1148.61	9.47e+06	2	-0.18	7.62	41
VLEEEEQR		1	Q05682	0	1031.5	5.34e+06	2	0.51	7.66	41
TLTIVDTGIGMTK	1xOxidation [M11]	1	P07900; Q58FG1	0	1365.73	3.03e+06	2	2.52	17.66	41
TSLLDNMIGVGDMVLLEPLNEETFINNLKK	2xOxidation [M7; M13]	1	O43795	1	3392.73	1.57e+06	3	-4.46	26.08	41
LQEMEGTVK	1xOxidation [M4]	1	P35579	0	1050.51	2.69e+07	2	-0.8	7.23	41
LQQEFEDKLEVEQQNKR		1	Q92614	2	2161.09	2.21e+06	4	2.21	11.97	41
SALLAAIR		1	O75128	0	814.51	9.90e+05	2	-0.08	16.88	41
NNDLQDNYLSEQNK		1	Q86V48	0	1694.76	1.19e+06	2	-3.02	12.32	41
TEVSLTLTNK		1	P46940	0	1105.61	6.12e+06	2	0.65	14.56	41
QVEDEKNSFR		2	P35579	1	1251.6	8.21e+06	3	-0.63	7.18	41
QELEEICHDLEAR	1xCarbamidomethyl [C7]	1	P35579	0	1641.75	2.37e+06	3	-0.27	15.27	41
SYSPYDMLESIRK	1xOxidation [M7]	2	A6NMY6; P07355	1	1604.76	5.96e+06	2	-0.37	14.91	41
DLTSVNILLK		1	Q01082; O15020	0	1115.67	6.84e+06	2	0.54	22.24	41
TVLCGTCGQPADK	2xCarbamidomethyl [C4; C7]	1	P02545	0	1406.64	8.87e+05	2	2.55	9.52	41
QLQMDVIR	1xOxidation [M4]	1	Q12792	0	1018.53	7.07e+06	2	0.51	11.22	41
YESHPVCADLQAK	1xCarbamidomethyl [C7]	1	Q9NX63	0	1517.71	2.09e+06	2	-0.6	9.79	41
VPVHDVTDASK		2	P21333	0	1167.6	8.60e+07	2	0.07	7.98	41
RFDDAVVQSDMK	1xOxidation [M11]	1	P11142	1	1426.66	1.69e+06	2	-0.41	9.89	41
TIEEQLDEEHLESHKK		1	Q9Y2D5	1	1964.96	3.48e+06	3	-0.35	9.95	41
AVLFCLSEDKK	1xCarbamidomethyl [C5]	1	P23528	1	1309.68	2.87e+06	3	-0.47	15.82	41
YALYDATYETK		1	P23528; Q9Y281	0	1337.63	7.32e+06	2	-1.51	14.61	41
VLISFK		1	O15511	0	706.45	5.81e+06	2	-0.22	16.81	41
LTVLSEER		1	Q13813	0	946.52	4.01e+07	2	-0.34	12.52	41
DGTIDFTPGSELLITK		2	O00159	0	1706.88	4.59e+07	2	-0.51	22.82	41
FAEFDQIMK	1xOxidation [M8]	1	Q9UM54	0	1144.53	5.27e+06	2	0.56	15.16	41
STELLIR		1	P84243; Q5TEC6; Q16695; Q6NXT2; P68431; Q71DI3	0	831.49	4.50e+07	2	-0.5	14.66	41
LQQFFNER		1	Q9UM54	0	1081.54	4.06e+06	2	-3.04	14.42	41
ADEGISFR		1	Q06830	0	894.43	1.51e+07	2	0.2	12.6	41
TLEEEAKTHEAQIQEMR		1	P35579	1	2042.98	3.02e+06	3	-0.19	11.89	41
VHLENMGSHDIVDGNHR	1xOxidation [M6]	2	P11277; Q01082; O15020	0	1945.89	7.80e+06	4	-0.06	8.28	41
HHTAAFEER		2	Q15149	0	1097.51	2.15e+07	2	0.53	6.59	41
FGVQSER		2	Q14247	0	822.41	1.72e+07	2	0.38	8.96	41
QEEEMMAKEEELVK	2xOxidation [M5; M6]	2	P35579	1	1754.78	2.33e+07	2	-0.36	9.06	41
EEGPYEVEVTYDGVPVPGSPFPLEAVAPTKPSK		1	P21333	1	3485.74	1.70e+07	3	-1.25	24.07	41
NWYSDADVPASAR		1	P05187; P10696	0	1451.65	3.72e+06	2	-0.94	14.6	41
YTACLCDDNPK	2xCarbamidomethyl [C4; C6]	1	P12273	0	1356.56		2	0.34	10.26	41
LGLAPQIQDLYGK		1	P46940	0	1415.79	1.96e+07	2	-0.56	20.51	41
LLQLGQQPR		1	Q9Y446	0	1052.62	2.61e+06	2	-0.66	14.02	41
LQAAYAGDKADDIQKR		1	Q01082	2	1762.91	1.31e+06	3	-0.17	8.8	41
IVQQLR		1	Q9NQX4	0	756.47	2.14e+06	2	-1.38	9.38	41
VRTELADKVTK		1	P35579	2	1259.73	2.73e+06	3	-0.19	8.04	41
LSVDYGKK		1	P0DPH7; Q71U36; P68363; Q9BQE3; P68366	1	909.5	5.19e+06	2	0.01	8.79	41
DFLAGGVAAAISK		1	P05141	0	1219.67	1.22e+07	2	2.32	20.5	41
SPPEALVQGR		1	Q9UHB6	0	1053.57	9.02e+06	2	0.85	11.64	41
KFDQLLAEEK		2	P35580; P35749; P35579; Q7Z406	1	1220.65	1.73e+08	2	-0.19	13.15	41
CCTESLVNR	2xCarbamidomethyl [C1; C2]	1	P02768	0	1138.5	4.18e+06	2	-1.38	9.54	41
YPIEHGIITNWDDMEK	1xOxidation [M14]	4	P63267; P62736; P68133; P68032	0	1976.91	4.43e+08	2	-1.13	15.88	41
MKDTDSEEEIR	1xOxidation [M1]	1	P0DP23	1	1368.59	2.27e+06	2	-0.43	6.89	41
DSTLIMQLLR		1	P63104; P31947; P31946; Q04917; P61981; P27348; P62258	0	1189.66	1.18e+06	2	0.53	25.78	41
TLTGTVIDSGDGVTHVIPVAEGYVIGSCIK	1xCarbamidomethyl [C28]	1	P61158	0	3058.58	8.03e+06	3	0.47	23.32	41
QEALKNDLVEALKR		2	P47756	2	1626.92	5.01e+06	3	0.33	14.88	41
DREDYVPYTGEK		2	Q9NYL9	1	1471.67	3.15e+07	2	0.09	11.24	40
IREEYPDR		2	Q13885; Q9H4B7; A6NNZ2; Q3ZCM7; P07437; P68371; Q9BVA1	1	1077.53	2.71e+07	2	0.72	7.35	40
IFVGGIKEDTEEHHLR		1	Q32P51; A0A2R8Y4L2; P09651	1	1879.97	1.14e+06	5	0.17	11.93	40
NTNPNFVR		1	P35580; P35579	0	961.48	1.18e+08	2	0.92	9.8	40
LECLQR	1xCarbamidomethyl [C3]	1	Q15149	0	818.42	2.08e+07	2	0.19	8.86	40
GGQGDPAVPAQQPADPSTPER		1	O15231	0	2074.98		2	-0.95	10.97	40
TIGTGLVTNTLAMTEEEK	1xOxidation [M13]	1	P49411	0	1923.96	1.74e+06	2	2.53	18.58	40
DVAEVDTVR		1	Q15149	0	1003.51	2.36e+07	2	-0.59	10.95	40
QNVAYEYLCHLEEAK	1xCarbamidomethyl [C9]	1	P46940	0	1866.87	1.61e+06	3	-0.73	19	40
VPDVQDGVR		1	Q15149	0	984.51	3.22e+07	2	0.03	10.33	40
IITLAGPTNAIFK		1	Q15366	0	1358.8	2.66e+06	2	0.2	21.88	40
KLHEEEIQELQAQIQEQHVQIDVDVSKPDLTAALR		2	P08670	2	4051.11	2.21e+07	4	0.19	20.24	40
LIALLEVLSQKK		1	P21333	1	1354.87	1.73e+06	3	-0.33	23.44	40
WAVIQGQAVR		1	Q8IVT2	0	1127.63	1.40e+07	2	0.11	15.26	40
ALEDSSFLKR		1	Q8WWI1	1	1165.62	1.56e+06	3	-2.88	12.98	40
PGTYVIYVR		1	O75369	0	1067.59	1.72e+07	2	-0.32	16.14	40
VEAQLQELQVK		1	P35579	0	1284.72	4.32e+07	2	0.15	15.11	40
LSIILQK		1	Q96M89	0	814.54	3.60e+06	2	-0.83	18.02	40
GYFNEELSEILSDPSDDTK		1	P15924	0	2158.97	8.84e+05	2	-1.31	23.52	40
SSEIEQAVQSLDR		1	Q9BPX5	0	1461.72	1.01e+07	2	0.23	17.58	40
AALLELWELR		1	Q13813	0	1213.69	3.78e+07	2	-1.44	25.41	40
HGSLGFLPR		1	P39023	0	983.54	4.03e+06	2	0.35	14.64	40
IEISELNR		1	P35908; P04264	0	973.53	8.58e+07	2	0.45	13.88	40
GCLDEETSR	1xCarbamidomethyl [C2]	1	Q15149	0	1066.45	1.27e+07	2	0.21	7.57	40
YCLVAVPHGNDIASLFELDPTTLQK	1xCarbamidomethyl [C2]	1	Q14573	0	2801.42	1.58e+06	3	0.01	25.79	40
DEYNALPAWK		1	O95425	0	1206.58	2.15e+06	2	0.46	17.61	40
KKVEAQLQELQVK		3	P35579	2	1540.91	8.90e+07	2	-0.26	11.15	40
LLEPVLLLGK		1	P62249	0	1094.72	1.33e+07	2	0.07	24.38	40
INAVVETGRR		1	Q01082	1	1114.63	2.46e+06	2	0.66	8.71	40
YQELINDIAR		1	P46940	0	1234.64	1.40e+07	2	0.59	16.51	40
EPSLATWEATWSEGSK		1	Q8WWI1	0	1778.82	1.03e+07	2	0.07	20.78	40
LPPVVPLPPPTLR		2	Q92614	0	1395.87	8.50e+06	3	-0.09	23.6	40
AFEDEMSGR		1	Q01082	0	1041.43	4.06e+06	2	-0.46	10.57	40
VNEVNQFAAK		1	Q13813	0	1119.58	2.68e+07	2	-0.24	10.8	40
DNLAEDIMR	1xOxidation [M8]	1	P08670	0	1092.5	1.65e+08	2	0.4	13.03	40
MAPTPIPTR		1	Q16643	0	983.53	9.18e+06	2	0.21	12.95	40
NVNVQNFHISWK		1	O43707	0	1485.76	7.09e+06	3	-0.77	17.43	40
DPTSLLGVLQAEADSTSEGLEDAVHSR		1	Q27J81	0	2797.35		4	1.27	26.96	40
NFITAEELR		1	O43707	0	1092.57	9.16e+06	2	0.45	16.35	40
AALEALLGR		1	O15061	0	913.55	1.77e+06	2	0.28	19.03	40
NKETLIIEPEK		1	O14974	1	1313.73	2.24e+06	2	-0.91	12.65	40
ALEEAMEQK		1	P35579	0	1048.5	2.23e+07	2	0.5	9.7	40
DLAALEDK		1	Q13813	0	874.45	1.94e+07	2	-0.62	13.35	40
VYGPGVAK		1	P21333	0	790.45	4.33e+07	2	0.03	9.03	40
DELHIVEAEAMNYEGSPIK	1xOxidation [M11]	1	P06748	0	2161.01	1.85e+06	3	1.46	18.97	40
TFSDTTHGSVPSDPLGR		2	Q86V48	0	1773.84		2	-0.11	13.66	40
NPTDEYLDAMMNEAPGPINFTMFLTMFGEK	3xOxidation [M10; M11; M26]	1	P19105	0	3472.51		3	-2.44	27.25	39
FDQLLAEEK		1	P35580; P35749; P35579; Q7Z406	0	1092.56	6.55e+07	2	0.57	14.33	39
GDSFFIR		1	Q9UDY2	0	841.42	1.66e+06	2	-0.37	16.74	39
HDLDLICR	1xCarbamidomethyl [C7]	1	P62136; P36873; P62140	0	1041.51	1.19e+07	2	0.45	13.32	39
SLRDQDKDQCILITGESGAGK	1xCarbamidomethyl [C10]	1	O43795	2	2291.13	3.74e+06	3	-0.61	12.29	39
YDVGAIR		1	P49792; Q99666; O14715; A6NKT7; Q7Z3J3	0	793.42	1.68e+07	2	-0.7	11.79	39
FSFSQR		1	Q92614	0	771.38	3.36e+06	2	-0.65	11.94	39
SPILVATAVAAR		1	O00571; O15523	0	1168.7	5.88e+06	2	0.35	17.86	39
EMEAELEDERK		2	P35579	1	1378.62	2.38e+07	2	-0.77	9.27	39
QAEVELASR		1	Q15149	0	1002.52	1.79e+07	2	-0.1	10.25	39
EATDPRPCEVENAVESWR	1xCarbamidomethyl [C8]	1	P47755	1	2144.97	1.05e+07	3	-0.3	16.42	39
GGGHVAQIYAIR		2	P62249	0	1241.67	9.26e+06	2	0.72	12.31	39
ELEDATETADAMNR	1xOxidation [M12]	3	P35579	0	1581.67	5.90e+07	2	-0.22	9.01	39
ECPTVAPAHSLTK	1xCarbamidomethyl [C2]	1	Q9UPQ0	0	1410.7	2.46e+06	3	0.25	9.91	39
EGEEATAEAEEK		1	Q13045	0	1292.55		2	-0.35	6.93	39
THEAQIQEMR	1xOxidation [M9]	1	P35579	0	1258.58	2.31e+07	2	-0.24	6.62	39
DLMSWINGIR		1	Q13813	0	1204.61	1.26e+06	2	0.41	26.04	39
AELNEFLTR		1	P23396	0	1092.57	1.21e+07	2	0.57	17.22	39
LVQAFQFTDK		1	Q06830	0	1196.63	2.30e+07	2	-3.34	17.45	39
VDILDPALLR		1	P17980	0	1124.67	6.81e+05	2	1.1	22.69	39
STPLEENVVDREQIDFLAAR		1	Q8IVT2	1	2302.17	7.05e+07	3	-0.28	19.97	39
HVVFIAQR		1	P62081	0	969.56	3.98e+06	2	-0.01	11.55	39
TEMEDLMSSK	2xOxidation [M3; M7]	1	P35579	0	1202.49	7.13e+06	2	-1.95	7.11	39
KLPEELGR		1	Q01082	1	941.54	1.22e+07	2	0.23	10.02	39
EGMQLISEKPETEAVVK	1xOxidation [M3]	1	Q01082	1	1903.97	3.48e+06	2	-0.29	13.05	39
GAQEVGER		1	Q15149	0	845.41	1.88e+06	2	0.01	6.43	39
LLNIQQQLTCSLR	1xCarbamidomethyl [C10]	1	Q5M775	0	1586.87		2	2.34	20.38	39
LEELGDQR		1	Q14643	0	959.48	1.57e+06	2	2.59	9.46	39
RQVDQLTNDK		1	P08670	1	1216.63	4.85e+07	2	-0.05	7.26	39
DIDVIMGGGR	1xOxidation [M6]	1	P05186	0	1048.51	4.45e+06	2	0.38	13.53	39
GYFSEEMNR	1xOxidation [M7]	1	Q15149	0	1148.47	1.74e+07	2	0.21	10.22	39
SQLIMQAEAEAASVR	1xOxidation [M5]	1	O75955	0	1619.81	1.63e+06	2	-1.6	16.98	39
TEFLSLLAK		1	Q12965	0	1021.59	3.54e+07	2	0.36	21.9	39
CSGPGLER	1xCarbamidomethyl [C1]	1	P21333	0	875.4	9.86e+06	2	-0.21	8.11	39
FPAAQAPDPSETPK		1	O14639	0	1455.71	1.09e+07	2	0.19	12.68	39
EQQIEEHR		1	Q16643	0	1068.51	2.11e+06	2	0.13	6.43	39
LGLNDILVK		1	Q8WXE9	0	984.61	2.19e+07	2	-0.18	20.71	39
EKPYFPIPEEYTFIQNVPLEDR		1	Q00839	1	2724.36	7.57e+06	3	1.35	24.19	39
ADYDTLSLR		1	Q9Y446	0	1053.52	2.09e+06	2	-0.42	14.88	39
QFEEIWER		1	Q9UM54	0	1136.54	3.26e+06	2	-0.16	17.14	39
DAVLLVFANK		1	P61204; P84077; P84085	0	1089.63	2.58e+06	2	0.25	22.31	39
QEALKNDLVEALK		1	P47756	1	1470.82	2.75e+06	3	-0.05	16.22	39
DIILPFR		1	Q96CW1	0	873.52	7.86e+05	2	0.57	22.53	39
KDGSCGVAYVVQEPGDYEVSVK	1xCarbamidomethyl [C5]	1	P21333	1	2386.12	1.98e+06	3	-0.3	16.72	39
FGVQMDR	1xOxidation [M5]	1	Q14247	0	868.4	4.57e+06	2	-0.19	9.21	38
LLETECPQYIR	1xCarbamidomethyl [C6]	1	P05109	0	1421.71	3.97e+06	2	0.57	15.03	38
VNKDDIQK		1	P35579	1	959.52	9.67e+06	2	-0.47	6.39	38
VKAEAEAAR		1	Q15149	1	944.52	2.40e+06	2	0.2	6.19	38
HGYIGEFEIIDDHR		1	P62244	0	1700.8	3.68e+06	3	-0.61	16.64	38
GMSAEYSFPIWK	1xOxidation [M2]	1	Q9Y512	0	1431.66	2.15e+06	2	0.67	20.54	38
SGFEPASLKEEVGEEAIVELVENGK		1	P35579	1	2660.33	5.06e+06	3	-0.12	23.66	38
AQDQGEKENPMR	1xAcetyl [N-Term]; 1xOxidation [M11]	1	P62913	1	1460.64		2	-0.05	6.73	38
QQFLSLEQANK		1	Q8IVT2	0	1305.68	7.65e+06	2	-0.19	15.66	38
VSYFPTVPGVYIVSTK		1	O75369	0	1756.95	1.89e+07	2	2.06	23.96	38
ISEQFTAMFR	1xOxidation [M8]	1	Q13885; Q13509; P04350; P07437; P68371; Q9BVA1	0	1245.59	2.21e+07	2	1.14	15.96	38
QRYEILTPNSIPK		1	P35579	1	1558.86	6.39e+06	2	0.73	15.55	38
LPVEVAYK		1	Q15149	0	918.53	2.23e+07	2	-0.16	14.54	38
QSPEHNLTHPELSVAVEMLSSVALINR	1xOxidation [M18]	1	P46940	0	2987.53	1.19e+06	3	-0.47	22.35	38
ISTISSVR		1	P15924	0	862.5	6.06e+06	2	1.13	10.42	38
AYFHLLNQIAPK		1	Q14651; P13797	0	1414.78	2.91e+06	2	1.44	18.49	38
GWWYAHFDGPWIAR		1	Q9UM54	0	1761.83	9.94e+05	3	0.13	22.76	38
LLEAQACTGGIIHPTTGQK	1xCarbamidomethyl [C7]	1	P15924	0	1995.03	2.52e+06	3	0.62	14.21	38
LQMQIGSHEHFNSWNQGFIIHHYAGK	1xOxidation [M3]	2	Q12965	0	3095.47	8.35e+06	5	-0.63	14.62	38
DALSDLALHFLNK		1	P50991	0	1456.78	8.83e+05	3	-0.04	25.71	38
YMNPAIVAPDAFDIIDLSAGGQLTTDQR	1xOxidation [M2]	1	P46940	0	3008.47		3	2.79	26.98	38
EATTEFSVDAR		1	P21333	0	1225.57	6.96e+07	2	-0.71	12.63	38
LLEAASVSSK		1	P15924	0	1004.56	4.86e+06	2	-0.07	11.23	38
RVEVVEEDGPSEK		1	O15231	1	1472.72	1.64e+06	3	1.01	8.84	38
FMELLEPLNER	1xOxidation [M2]	1	Q01082	0	1406.7	2.22e+07	2	0.08	19.14	38
THEAQIQEMR		1	P35579	0	1242.59	1.36e+07	3	-0.35	8.14	38
ALEEANADLEVK		1	P02533; P19012; P13646; P08779	0	1301.66	6.16e+06	2	-0.16	13.43	38
KAGTQIENIEEDFRDGLK		1	P12814	2	2063.04	2.77e+06	3	0.33	17.14	38
LLLAIMESR	1xOxidation [M6]	1	Q14571; Q14643	0	1061.6	2.47e+06	2	0	18.39	38
GNFHAVYR		1	P05109	0	963.48	2.77e+06	2	1.09	8.77	38
PAQLANAR		1	Q9UHB6	0	840.47	2.10e+06	2	-1.18	7.39	38
IQQFLR		1	Q9NVI1	0	804.47	3.97e+07	2	0.37	13.44	38
ELSDLEEENR		1	Q5M775	0	1233.56	1.05e+06	2	-1.07	10.96	38
SASVNKEPVSLPGIMR	1xOxidation [M15]	2	Q8WWI1	1	1700.9	9.15e+06	3	-1.6	14.76	38
GMGGAFVLVLYDEIKK	1xOxidation [M2]	1	P05141; P12235	1	1755.93	6.36e+06	3	0.49	23.19	38
LVARPEPATGYTLEFR		1	Q16658	1	1819.97	3.01e+06	3	-2.17	16.8	38
DLMVGDEASELR		1	P61160	0	1334.63	1.78e+06	2	0.92	16.86	38
DLAALEDKVK		1	Q13813	1	1101.62	1.59e+06	2	-0.53	14.44	38
HVVPNEVVVQR		1	P06396	0	1275.72	1.31e+06	2	-0.92	11	38
VLYQVEGFVDK		1	O43795	0	1296.68	4.21e+06	2	0.07	18.06	38
IQAFIR		1	P46940	0	747.45	1.73e+07	2	1.11	13.92	38
LDFDGLPSGIGK		1	Q13045	0	1218.64	4.13e+06	2	1.64	19.84	38
SLYYYIQQDTK		1	A6NMY6; P07355	0	1421.69	2.33e+07	2	-0.75	16.58	38
VGIVAWHPTAR		1	Q9ULV4	0	1206.67	1.88e+07	3	-0.33	14.76	38
NKHEAMITDLEER		1	P35579	1	1585.76	1.15e+07	3	0.43	11.12	38
ENAGEDPGLAR		1	P81605	0	1128.53	1.97e+06	2	0.87	8.81	38
AGDTTKFDVEVLK		1	Q27J81	1	1422.75	2.81e+06	2	0.86	15.72	38
KRPETVATQFK		2	O00159	2	1304.73	4.13e+07	3	0.76	8.07	38
VAYVSFGPHAGK		1	P50914	0	1232.64	1.63e+06	2	1.21	13.05	38
FNGSHVVGSPFK		1	O75369	0	1275.65	1.53e+06	3	-0.77	12.53	38
AGLVGPEFHEK		1	Q15149	0	1183.61	2.04e+07	2	0.04	12.27	38
SYLTPVRDEESESQR		1	O14974	1	1795.85	3.54e+06	3	-0.01	10.81	38
DTLYEAVR		1	P62906	0	966.49	4.48e+06	2	0.61	13.34	38
QIATLHAQVADMK	1xOxidation [M12]	1	P35579	0	1441.75	1.13e+07	2	-2.56	10.62	38
QALHSLELHYQAFLR		1	Q15149	0	1825.97	7.58e+06	4	0.3	17.96	38
LLAEETAATISAIEAMK	1xOxidation [M16]	1	Q6WCQ1	0	1777.93	2.02e+06	3	-2.19	20.81	38
FVPQEMGVHTVSVK	1xOxidation [M6]	1	O75369	0	1573.8	3.08e+06	2	1.52	11.67	38
ILNEMR		1	P02533; Q04695; P08779	0	775.41	9.61e+06	2	-0.25	10.29	38
AIIIFVPVPQLK		1	P62081	0	1337.86	2.68e+06	2	0.82	26.96	38
PFVPNVHAAEFVPSFLR		1	Q8IYD1	0	1927.02	1.40e+06	3	1.4	23.56	37
ATHGQTCAR	1xAcetyl [N-Term]; 1xCarbamidomethyl [C7]	1	P45880	0	1043.47	5.32e+05	2	0.21	6.3	37
NRETASELLMR	1xOxidation [M10]	1	Q01082	1	1335.67	3.37e+06	2	3.46	10.84	37
IFDLGR		1	Q96L21; P27635	0	720.4	5.42e+06	2	-0.49	15.9	37
IGPLGLSPK		1	P30050	0	881.55	8.56e+06	2	0.46	16.38	37
IIEETLALK		1	O15144	0	1029.62	2.11e+07	2	0.15	16.58	37
LLEGEESR		1	P08729; P17661; P08670; P41219; Q9NSB2; P05787	0	932.47	5.82e+08	2	-0.24	8.7	37
LPEELGR		1	Q01082	0	813.45	1.54e+07	2	0.56	11.34	37
YPILGIPQAHR		2	Q8IVT2	0	1264.72	2.49e+07	3	-0.96	16.59	37
EELYQNLTR		1	Q13813	0	1165.58	3.62e+07	2	1.04	13.59	37
WQNNLLPSR		1	P62244	0	1127.6	4.64e+06	2	-0.86	15.76	37
FSGVPDR		1	A2NJV5; A0A075B6R9; A0A075B6S2; A0A0A0MRZ7; A0A0C4DH68	0	777.39	3.17e+08	2	-0.33	9.88	37
LEEEENLTR		1	Q86V48	0	1132.55	1.70e+06	2	1.05	9.74	37
LICCDILDVLDK	2xCarbamidomethyl [C3; C4]	1	P62258	0	1476.74	1.44e+06	2	-0.06	24.44	37
DAEAWFNEK		1	Q7Z3Y7; P13645; Q7Z3Z0; Q7Z3Y8	0	1109.49	2.68e+07	2	0.86	15.98	37
QEEVCVIDALLADIR	1xCarbamidomethyl [C5]	1	Q27J81	0	1743.89		3	0.04	27.12	37
YFEIQFSPGGEPDGGK		1	Q12965	0	1727.79	1.44e+07	2	-0.12	19.62	37
LRLPLDKEPAR		2	Q15149	2	1307.78	1.29e+07	2	-0.69	12.52	37
VPEGGEGISATEVDSR		1	Q9UPN3	0	1602.76	1.87e+07	2	-1.46	12	37
LISISGK		1	Q9C0A0	0	717.45	1.20e+07	2	-0.81	12.8	37
LVLVGDGGTGK		1	P62826	0	1015.58	1.56e+07	2	0.6	13.79	37
MAVTFIGNSTAIQELFK		1	P07437	0	1869.98	1.52e+06	2	-2.45	26.47	37
AIMTYVSSFYHAFSGAQK		1	P12814; O43707	0	2007.96	2.52e+06	3	0.99	22.67	37
FTITPPTAQVVGVLK		2	P52907	0	1570.92	1.14e+08	2	-1.15	22.75	37
GEAGVPAEFSIWTR		1	O75369	0	1519.75	1.64e+07	2	0.31	21.68	37
QKLDILDQER		1	Q13813	1	1257.68	7.36e+06	2	1.55	13.29	37
YRDQFTDQQK		1	O43795	1	1328.62	1.62e+06	2	-0.63	7.67	37
DLTDYLMK	1xOxidation [M7]	7	P63267; P60709; P62736; P68133; Q562R1; P68032; P63261	0	1014.48	2.03e+09	2	0.93	16.96	37
GLVGPELHDR		1	Q15149	0	1092.58	2.26e+07	3	-0.62	11.28	37
KLDPAQSASR		2	Q13813	1	1072.57	1.77e+07	2	0.31	6.8	37
ALKDEEKMELQEIQLK	1xOxidation [M8]	1	P06753	2	1961.03	6.03e+06	3	0.03	14.01	37
CGYAGSNFPEHIFPALVGR	1xCarbamidomethyl [C1]	1	P61160	0	2092.01	1.90e+06	3	-0.1	21.64	37
TPVEPEVAIHR		1	P60866	0	1247.67	6.08e+06	3	-0.32	12.06	37
IDSLSAQLSQLQK		1	P02545	0	1430.78	2.25e+06	2	-2.03	17.78	37
HSGVDDMVLLSK	1xOxidation [M7]	2	Q12965	0	1316.65	2.75e+07	2	1.9	12.21	37
ETDKQILQNR		1	Q9UM54	1	1244.66		2	-1.17	8.29	37
AGYAYR		1	Q12965	0	700.34	5.76e+06	2	0.78	7.71	37
SQDVELWEGEVVK		1	Q9UHB6	0	1517.75	4.22e+07	2	-1.85	18.46	37
LQIASDENYKDPTNLQGK		2	Q13813	1	2034.01	2.52e+07	3	0.93	13.14	37
ADTGLFSR		1	Q14134	0	866.44	2.51e+06	2	1.31	13	37
VGGVGPADTHEPLRPEAEPGELER		1	Q6WCQ1	1	2512.24		3	-3.84	13.4	37
AEQEEYVQEGIR		1	Q12965; O00160	0	1450.68	2.86e+07	2	0.57	11.56	37
YQAVTATLEEK		1	Q6NVV1; P40429	0	1252.64	4.35e+06	2	-1.12	12.87	37
EEAVLFLLDLPK		1	Q07157	0	1386.79	7.47e+05	2	-0.36	27.11	37
DVLLQVDDERR		1	P35579	1	1357.71	4.13e+07	2	-0.31	14.14	37
IYISLLK		1	O60716	0	849.54	1.33e+06	2	-1.43	19.99	37
AYLQEEERENSEVSPR		1	Q14573	1	1935.9	2.33e+06	3	-0.73	9.96	37
NLQEAEEWYK		2	P08670; P41219	0	1309.61	3.40e+08	2	0.17	15.31	37
DCMRELDDTR	1xCarbamidomethyl [C2]; 1xOxidation [M3]	2	P35579	1	1326.54	5.28e+06	3	-0.17	7.23	37
FEELCSDLFR	1xCarbamidomethyl [C5]	1	P48741; P17066; P0DMV8	0	1315.6	3.05e+06	2	0.62	19.81	37
RPVVLFGPIADIAMEK	1xOxidation [M14]	1	Q9UDY2	1	1771.98	1.81e+06	3	-1.13	22.06	37
SLTLSFVSER		1	Q86V48	0	1138.61	5.81e+06	2	1.19	19.24	37
QLQEDAAR		1	Q01082	0	930.46	5.33e+06	2	0.7	6.9	37
QEELQQLEQQR		1	Q15149	0	1428.71	1.64e+06	2	-2.26	12.2	37
IQLVEEELDRAQER		1	P67936; P09493; P07951; P06753	1	1727.89	2.74e+07	3	-0.29	15.43	37
FTVETR		1	P21333; Q14315	0	752.39	5.27e+07	2	0.4	9.94	37
ASSEGGTAAGAGLDSLHK		1	O15143	0	1628.79	2.65e+06	2	-1.46	10.51	37
IMGIPEEEQMGLLR	1xOxidation [M10]	1	P35579	0	1631.81	4.84e+07	2	2.18	19.37	37
WISIMTER	1xOxidation [M5]	1	A6NMY6; P07355	0	1051.52	1.18e+07	2	0.58	15.55	36
ELLGWVSTLAR		1	Q9UPN3	0	1244.7		2	0.4	24.02	36
ILLTEPPMNPTK	1xOxidation [M8]	1	P61160	0	1369.74	1.71e+07	2	-0.01	15.3	36
EITALAPSTMK	1xOxidation [M10]	6	P63267; P60709; P62736; P68133; P68032; P63261	0	1177.61	2.30e+09	2	-0.49	29.86	36
DIEAQTQKPEPPESAEK		1	Q6NYC8	1	1896.92	2.22e+06	3	2.65	9.4	36
GNFNYIEFTR		2	O14950; P19105	0	1260.6	1.32e+08	2	-0.78	18.25	36
ADRDESSPYAAMLAAQDVAQR	1xOxidation [M12]	1	P62263	1	2281.05	1.75e+06	3	0.73	14.09	36
DYETATLSDIK		1	O43707	0	1255.61	5.72e+06	2	0.03	15.43	36
NPNAMLVNLEEPLASTYQDILYQAK	1xOxidation [M5]	1	P46940	0	2851.42	4.41e+06	3	1.25	25.92	36
PVTEKDLAEDAPWK		1	O75369	1	1598.81	3.19e+06	3	-0.69	15.2	36
GGGGNFGPGPGSNFR		1	P22626	0	1377.63	5.97e+06	2	-0.7	12.58	36
TYSLGSALR		1	P08670	0	967.52	3.17e+07	2	0.14	14.54	36
TDITYPAGFMDVISIDK	1xOxidation [M10]	1	P62701	0	1901.92	1.52e+06	2	-3.79	22.35	36
ALESSIAPIVIFASNR		1	Q9Y265	0	1687.94	3.37e+05	3	-0.09	25.1	36
SKGIYQSLEGAVQAGQLK		1	Q15149	1	1877.01	1.89e+06	3	-0.41	17.16	36
LFVIGGK		1	Q8NAB2	0	733.46	2.50e+06	2	-0.51	14.82	36
IDDIFER		1	Q01082	0	907.45	3.74e+07	2	-0.09	15.63	36
YSNVSSIEDSFAMEK	1xOxidation [M13]	1	O15231	0	1722.75	1.87e+06	2	-3.46	16.23	36
MNEVISLWK	1xOxidation [M1]	1	Q13813	0	1135.58	1.44e+07	2	-0.12	19.08	36
VTMESALTAR		1	O00159	0	1078.56	6.74e+06	2	-0.83	13.56	36
EFSIDVGYER		1	P61158	0	1214.57	7.61e+06	2	-4.54	17.48	36
VFSATLGLVDIVK		1	P09874	0	1361.8	1.20e+06	2	2.87	24.46	36
QDVDNASLAR		1	P08670	0	1088.53	2.00e+06	2	-0.29	9.51	36
YPIEHGIITNWDDMEKIWHHTFYNELR	1xOxidation [M14]	1	P68133; P68032	1	3473.64	1.27e+07	4	-2.34	19.24	36
AQLEEASSAR		1	Q16352	0	1061.52		2	0.43	7.58	36
RLTVNEAVK		1	Q15149	1	1029.61	1.10e+07	2	0.86	8.94	36
ETWLSENQR		1	P11277; Q01082; O15020	0	1162.55	1.77e+07	2	0.13	12.45	36
ENAAYFQFFSDVR		1	Q15149	0	1593.73	1.11e+07	2	0.21	22.89	36
TLSMIEEEIR		1	Q9Y2D5	0	1220.62	1.83e+06	2	-0.74	17.76	36
ELLTTMGDR		1	P24844; O14950; P19105	0	1035.51	1.48e+07	2	-0.31	13.97	36
AMVSNAQLDNEK		1	Q9Y608; Q32MZ4	0	1319.63	1.10e+06	2	0.4	10.1	36
FDVEVLK		1	Q27J81	0	849.47	3.53e+06	2	-0.55	17.51	36
TLEAER		1	Q15149; O75146	0	718.37	5.70e+06	2	-0.97	6.92	36
NYSNLLAFCR	1xCarbamidomethyl [C9]	1	O75431	0	1257.6	1.34e+06	2	-1.3	19.01	36
MNEVISLWK		1	Q13813	0	1119.59	6.29e+06	2	0.68	20.36	36
FADQHVPGSPFSVK		1	P21333	0	1515.76	1.83e+07	2	-0.3	14.93	36
ELYLFDVLR		1	P08243	0	1167.64	3.56e+05	2	-0.56	26.2	36
DLAEDAPWK		1	P21333; O75369; Q14315	0	1044.5	8.43e+06	2	-0.67	16.22	36
TKQDEVNAAWQR		1	Q13813	1	1445.71	5.70e+06	3	0.36	9.6	36
IQDLAIR		1	Q92614	0	828.49	8.34e+06	2	0.13	13.23	36
AADAEAEVASLNRR		1	P06753	1	1472.75	3.02e+06	3	-0.01	10.19	36
STPLEENVVDR		1	Q8IVT2	0	1258.63	3.06e+06	2	1.65	12.96	36
SKGNYDEGFGHRPHK		1	Q9UHB6	2	1728.82	3.34e+06	4	0.49	6.53	36
QVQFHQGFGDLAVLKPSNK		2	Q12965	1	2113.12	1.04e+07	3	-1.11	16.99	36
FMVSTAVGSR	1xOxidation [M2]	1	O95425	0	1070.53	4.12e+06	2	1.3	12.64	36
GITEPPFGIFVFNK		1	Q14126	0	1565.84	3.03e+06	2	0.69	26.65	36
HQGVMVGMGQK	2xOxidation [M5; M8]	2	P63267; P60709; P62736; P68133; Q562R1; P68032; P63261	0	1203.56	7.07e+08	3	2	6.61	36
LTVNEAVK		1	Q15149	0	873.5	3.48e+07	2	-0.13	10.56	36
ACLISLGYDVENDRQGEAEFNR	1xCarbamidomethyl [C2]	1	O43707	1	2556.18	1.87e+06	3	0.06	18.63	36
EHVIEALR		1	P27635	0	966.54	2.24e+06	2	-2.56	10.66	36
HTGPNSPDTANDGFVR		2	P31943; P55795	0	1684.77	2.18e+06	3	-2.44	9.99	36
KLPIDVTEGEVISLGLPFGK		1	P26599	1	2112.2	7.84e+05	3	1.34	25.56	36
VMLTTAGGTK	1xOxidation [M2]	1	Q9UM54	0	994.52	2.91e+06	2	0.09	9.23	36
RPELEDSTLR		1	Q15149	1	1215.63	4.12e+07	2	-0.75	9.91	36
FDVLAPHLTK		1	Q92614	0	1140.64		2	0.1	16.49	36
HRPELIDYGK		1	P12814	1	1227.65	2.06e+06	2	-0.94	10.05	36
YKEVAELTR		1	Q01082	1	1108.6	1.10e+07	2	1.83	9.77	36
VAPEEHPILLTEAPLNPK		2	Q9BYX7; P0CG39; Q6S8J3; P0CG38	0	1968.08	1.50e+07	3	0.15	18.34	36
DLASVNNLLK		1	Q13813	0	1086.62	1.35e+07	2	0.84	19.44	36
SFGDKDFR		1	Q9UPQ0	1	971.46	2.45e+06	2	3.89	9.47	36
YTILIK		1	P21333	0	750.48	6.50e+07	2	0	15.78	36
LFFPVIYDVK		1	Q9UIV1	0	1240.7	5.56e+05	2	0.44	25.73	36
VYNVTQHAVGIVVNK		1	P46778	0	1640.91		2	-0.79	14.57	36
ELAQEQAR		1	Q15149	0	944.48	8.64e+06	2	0.47	6.87	35
VRAEMEVLLASK	1xOxidation [M5]	1	Q15149	1	1361.75	5.02e+06	2	1.75	12.1	35
TSFPEDTVITYK		1	P08174	0	1400.69	8.95e+06	2	0	17.15	35
GLDQDHAR		1	Q9UDY2	0	911.43	1.60e+05	2	-1.27	6.19	35
LSSPPLR		1	Q96ET8	0	769.46	2.54e+07	2	-2.71	10.64	35
ILDDDTIITTLENLKR		1	Q14204	1	1873.03		3	-0.07	24.12	35
AAQGEPQVQFK	1xAcetyl [N-Term]	1	P62826	0	1244.63	1.03e+07	2	-4.2	15.1	35
VGEFSGANK		1	P10599	0	908.45	2.66e+06	2	-0.24	8.4	35
NNDLVR		1	Q9NZR1; Q9NYL9	0	730.38	1.02e+07	2	-0.2	8.02	35
AGLAPLEVR		1	O75369	0	925.55	2.38e+07	2	-0.38	16.17	35
MREEVITLIR	1xOxidation [M1]	2	P46940	1	1275.71	1.04e+07	2	0.08	15.51	35
HQAFMAELASNK	1xOxidation [M5]	1	Q01082	0	1362.65	3.49e+06	2	-0.84	10.26	35
LASYLDK		1	P02533; P08727; P13645; P19012; Q99456; Q04695; P35527; P08779	0	809.44	8.52e+07	2	-0.14	11.05	35
DLTSVMR		1	Q01082	0	821.42		2	-0.07	14.58	35
YLYVDK		1	P35579	0	800.42	1.03e+08	2	0.21	11.4	35
SEFEQNLSEK		1	Q16891	0	1210.56	1.24e+07	2	0.72	10.56	35
TKDDIIICEIGDVFK	1xCarbamidomethyl [C8]	1	Q9Y512	1	1765.9	3.15e+06	3	1.05	23.25	35
KTLEEEAK		1	P35579	1	947.5	5.17e+06	2	0.3	6.58	35
NILDSKPTANK		1	Q9ULV4	1	1200.66	2.86e+06	2	0.69	9.39	35
KDNYPQSVPR		1	O00159	1	1203.61	2.09e+06	3	-0.48	8.32	35
AALEEVER		1	Q15149	0	916.47	1.62e+07	2	-0.07	10.01	35
ILKEEQELYQK		1	Q9UM54	1	1420.77	3.85e+06	2	-2.65	10.74	35
DVDETISWIK		1	Q13813	0	1205.6	2.06e+07	2	-0.15	19.88	35
CLYLIGR	1xCarbamidomethyl [C1]	1	Q12965	0	894.49	1.32e+07	2	0.31	17.18	35
FLEGVR		1	P05388; Q8NHW5	0	720.4	4.97e+06	2	-0.32	12.43	35
IDLGNCQDEK	1xCarbamidomethyl [C6]	1	Q9UPQ0	0	1191.53	1.60e+06	2	-1.62	10	35
LSSGFDDIDLPSAVK		1	Q9Y446	0	1563.79	2.81e+06	2	-1.09	20.25	35
NFIGDYIGMEEHPELQQFVGK	1xOxidation [M9]	1	Q12965	0	2467.16	2.41e+08	3	1.38	20.87	35
SIFSAVLDELK		1	P31327	0	1221.67	6.61e+05	2	1.5	26.45	35
IVATKPLYVALAQR		1	Q9H361; P11940	1	1542.94	1.60e+06	3	0.55	17.33	35
IAGYVTHLMK	1xOxidation [M9]	1	P08708	0	1148.61	1.45e+06	2	-0.46	10.96	35
VVFQEFR		1	P35579	0	924.49	3.04e+08	2	-0.35	15.63	35
EGLTSIEEVTK		1	Q15149	0	1205.63	2.35e+07	2	-0.06	15.52	35
VSQTPESLDFLK		1	Q12965	0	1363.71	1.69e+07	2	0.45	19.05	35
LSIYNALK		1	Q15149	0	921.54	1.66e+07	2	-0.33	17.29	35
ALEQQVEEMK	1xOxidation [M9]	1	P35579	0	1220.58	2.50e+07	2	-0.13	8.99	35
SVQTFADK		1	P47756	0	895.45	6.17e+07	2	0.25	9.21	35
VVLIGGKPDR		1	P61978	1	1053.64	5.14e+06	3	-0.54	11.16	35
IAELNR		1	Q8N0Z3	0	715.41	5.44e+06	2	-1.02	8.67	35
VEVERDNLAEDIMR		1	P08670	1	1688.83	1.70e+07	2	0.14	16.07	35
EVDEDFDSK		1	Q96C19	0	1083.45	1.28e+07	2	-0.78	9.36	35
SELELTLGK		1	Q15149	0	989.55	2.37e+07	2	0.33	16.76	35
LHLSSPDNFR		1	Q9UM54	0	1185.6	3.40e+06	2	1.26	12.62	35
LNVAFMESK	1xOxidation [M6]	1	O95425	0	1054.52	2.83e+06	2	1.36	13.54	35
RGESLDNLDSPR		1	Q8WWI1	1	1358.67	6.91e+06	3	-0.26	10.19	35
ADVVESWIGEK		1	Q13813	0	1232.62	2.38e+07	2	0.52	17.85	35
IYEFTLQR		1	O43795	0	1069.57	1.56e+07	2	0.46	17.21	35
DLDFANDASSMLASAVEK	1xOxidation [M11]	1	Q14573	0	1899.86		2	2.77	20.44	35
SLTLQEALEVR		1	Q96M02	0	1258.7	3.72e+06	2	-1.86	19.72	35
RGETESEEFEK		1	Q05682	1	1340.6	1.64e+06	2	-0.26	7.32	35
FANYIDK		1	P08670	0	870.44	4.22e+08	2	9.33	11.62	35
QMREMEENFAVEAANYQDTIGR	2xOxidation [M2; M5]	1	P08670	1	2634.16	1.21e+07	3	0.17	15.78	35
HKDVAEEIANYRPTLDTLHEQASALPQEHAESPDVR		1	Q01082	2	4066.99		4	4.3	16.48	35
RLQEDKEQMAQQLAEETQGFQR	1xOxidation [M9]	1	Q15149	2	2679.28		3	-0.17	12.85	35
DYLLCDYNRDGDSYR	1xCarbamidomethyl [C5]	1	P47756	1	1924.81	1.12e+06	2	-0.12	15.24	35
QSACNLEK	1xCarbamidomethyl [C4]	1	P35579	0	949.44	8.71e+06	2	0.48	6.82	35
EKIDFADTVTK		1	Q12965	1	1266.66	2.34e+07	2	0.8	13.14	35
LLEVQGSRPGK		2	P62136	1	1183.68	4.37e+06	3	-0.87	9.6	35
KKEIEELQSQAQALSQEGK		1	Q01082	2	2144.12	6.59e+06	3	1.23	13.03	35
SDEGQLSPATR		1	Q15149	0	1160.55	1.95e+07	2	0.35	8.79	35
LAILGIHNEVSK		2	P12814	0	1293.75	2.39e+07	3	0.87	15.91	35
LLDLSVFR		1	O15427	0	962.57	6.89e+05	2	1.58	22.64	35
VFDPQNDKPSK		1	O15145	1	1274.64	5.04e+06	3	-1.31	8.35	34
[truncated: 572 more rows]
