# Supplementary material for: FATS inhibits the Wnt pathway and induces apoptosis through degradation of MYH9 and enhances sensitivity to paclitaxel in breast cancer
Source: Research Square preprint supplement (doi:10.21203/rs.3.rs-4186589/v1), 2024-05-02
Supplement: Supplementary file 2 [file f70dc1831bdb9f8b23403e3d.xlsx]

## Sheet: Summary
Header line description of workshhet "Proteins"
Accession	蛋白编号	Protein accession number of database used for search.
Protein names	蛋白名称	Names of proteins this peptide is associated with.
Gene names	基因名称	Indicates the name of the gene that code for the protein sequence.
MW [kDa]	蛋白分子量（kDa）	Protein molecular weight.
Protein score	蛋白打分值	Score for protein matching degree (the higher score, the better matching).
Sequence coverage (%)	序列覆盖率（%）	Percent of identified peptide sequence covering in protein sequence.
Unique Peptides	特异性肽段数目	Number of unique peptides which spectrums hit.
Peptides	肽段数目	Number of peptides which spectrums hit.
PSMs	二级谱图数目	Number of peptide-spectrum matches.
Abundances	丰度	Displays the abundances of the samples before scaling and normalization.
Header line description of workshhet "Peptides"
Sequence	肽段序列	Identified peptide amino acid sequence.
Modifications	修饰类型	The modification composition of the peptide isoform group.
Accession	蛋白编号	Protein accession number of database used for search.
PSMs	二级谱图数目	Number of peptide-spectrum matches.
Missed Cleavages	漏切位点数	Number of missed enzymatic cleavages.
Theo. MH+ [Da]	分子量	The theoretical MH+ mass of the modified peptide in Daltons.
Abundances	丰度	Displays the abundances of the samples before scaling and normalization.
Charge	电荷数	Carried charge of peptide.
DeltaM [ppm]	质量误差（ppm）	Deviation of the measured mass from the theoretical mass of the peptide, in ppm.
RT [min]	保留时间	The uncalibrated retention time in minutes in the elution profile of the precursor ion.
Ions Score	肽段打分值	The score for the observed MS/MS match between the experimental data and the database sequence.

## Sheet: Proteins
Accession	Protein names	Gene names	MW [kDa]	Protein score	Sequence coverage (%)	Unique Peptides	Peptides	PSMs	Abundances
P60709	Actin, cytoplasmic 1	ACTB	41.7	272	28	6	6	6	1.40e+07
P02768	Albumin	ALB	69.3	211	12	6	6	7	1.44e+07
P01614	Immunoglobulin kappa variable 2D-40	IGKV2D-40	13.3	134	11	1	1	2	2.04e+08
P81605	Dermcidin	DCD	11.3	100	13	2	2	2	3.93e+06
P05109	Protein S100-A8	S100A8	10.8	90	24	2	2	2	4.12e+06
P12273	Prolactin-inducible protein	PIP	16.6	73	18	2	2	2	6.10e+06
Q02413	Desmoglein-1	DSG1	113.7	72	3	2	2	2	3.47e+05
Q08554	Desmocollin-1	DSC1	99.9	68	2	1	1	1	6.17e+05
P68871	Hemoglobin subunit beta	HBB	16	58	9	1	1	1	8.53e+05
Q86YZ3	Hornerin	HRNR	282.2	58	2	1	1	1
P02788	Lactotransferrin	LTF	78.1	57	1	1	1	1	8.94e+05
P61626	Lysozyme C	LYZ	16.5	55	8	1	1	1	1.74e+06
P62987	Ubiquitin-60S ribosomal protein L40	UBA52	14.7	52	13	1	1	1	5.30e+05
P04406	Glyceraldehyde-3-phosphate dehydrogenase	GAPDH	36	51	4	1	1	1	1.26e+06
P06733	Alpha-enolase	ENO1	47.1	49	1	1	1	1	2.05e+06
Q8IW75	Serpin A12	SERPINA12	47.1	47	2	1	1	1	3.71e+05
Q5D862	Filaggrin-2	FLG2	247.9	47	0	1	1	1	2.74e+06
P01040	Cystatin-A	CSTA	11	45	12	1	1	1	1.69e+06
P06702	Protein S100-A9	S100A9	13.2	45	13	1	1	1	1.66e+06
Q96CD2	Phosphopantothenoylcysteine decarboxylase	PPCDC	22.4	37	3	1	1	1	4.33e+06

## Sheet: Peptides
Sequence	Modifications	# PSMs	Accession	Missed Cleavages	Theo. MH+ [Da]	Abundances	Charge	DeltaM [ppm]	RT [min]	Ions Score
ISIGGGSCAISGGYGSR	1xCarbamidomethyl [C8]	1	P04259; P02538; P48668	0	1598.76	5.02e+05	2	-0.11	14.46	118
DLYANTVLSGGTTMYPGIADR	1xOxidation [M14]	1	P60709; P63261	0	2231.06		2	-0.71	20.18	113
SYELPDGQVITIGNER		1	A5A3E0; P63267; Q9BYX7; P60709; Q6S8J3; P62736; P68133; Q562R1; P68032; P63261	0	1790.89	2.82e+06	2	0.8	19.77	101
FSGSGSGTDFTLK		2	P01614; A2NJV5; P01615; A0A075B6S2; A0A0A0MRZ7; P06310; A0A075B6S6	0	1303.62	2.04e+08	2	-0.26	14.94	85
LGKDAVEDLESVGK		1	P81605	1	1459.76	3.93e+06	2	0.07	14.68	83
TTGIVMDSGDGVTHTVPIYEGYALPHAILR	1xOxidation [M6]	1	P60709; P63261	0	3199.61	1.65e+06	4	-0.29	20.75	70
VTATDLDEPDTLHTR		1	Q08554	0	1683.82	6.17e+05	3	-0.85	12.49	68
QNLEPLFEQYINNLR		1	P04259; P02538; P48668; P13647	0	1890.97	1.51e+06	2	2.02	25.38	67
FLEQQNQVLQTK		1	Q7Z794; P35908; P04264	0	1475.79	5.84e+07	2	-0.04	13.83	66
VTMQNLNDR	1xOxidation [M3]	1	P02533; Q7Z3Y7; P13645; Q7Z3Y9; Q7Z3Z0; Q7Z3Y8; P08779	0	1106.53	3.33e+07	2	0.48	6.87	66
YEELQVTAGR		1	P02538; O95678; P48668	0	1165.58	1.32e+06	2	-0.12	12.38	63
WTLLQEQGTK		1	P04259; P02538; P48668; P13647	0	1203.64	4.14e+06	2	1.28	16.67	62
ALNSIIDVYHK		1	P05109	0	1272.69	1.34e+06	2	-0.12	16.54	62
YEELQITAGR		1	P04264; P04259	0	1179.6	5.12e+07	2	0.07	14.08	62
EVATNSELVQSGK		1	P02533; Q04695	0	1361.69	1.64e+06	2	0.2	10.11	61
VTMQNLNDR		1	P02533; Q7Z3Y7; P13645; Q7Z3Y9; Q7Z3Z0; Q7Z3Y8; P08779	0	1090.53	9.19e+06	2	0.41	10.11	61
TCVADESAENCDK	2xCarbamidomethyl [C2; C11]	1	P02768	0	1498.58		2	0.3	6.88	60
ALEEANADLEVK		1	P02533; P19012; P13646; P08779	0	1301.66	1.87e+06	2	1.62	13.31	60
KVPQVSTPTLVEVSR		2	P02768	1	1639.94	1.04e+07	2	-0.42	15.42	60
IVLQIDNAR		1	P08727; P05783	0	1041.61	4.50e+07	2	0.5	15.28	59
QEPSDSPMFIINR	1xOxidation [M8]	1	Q02413	0	1549.73	3.47e+05	2	1.16	16.3	59
ITMQNLNDR	1xOxidation [M3]	1	P19012; P13646	0	1120.54	3.29e+06	2	0.13	8.07	59
VNVDEVGGEALGR		1	P68871	0	1314.66	8.53e+05	2	0.2	14.29	58
LLETECPQYIR	1xCarbamidomethyl [C6]	1	P05109	0	1421.71	2.79e+06	2	1.08	15.04	58
QSVEADINGLR		1	Q2M2I5; P13645; P13646	0	1201.62	4.99e+06	2	0.18	14.04	58
GPYESGSGHSSGLGHR		1	Q86YZ3	0	1584.71		3	0.37	6.43	58
YEDEINKR		1	Q7Z794; P35908; P04264; P04259; P02538; Q01546; O95678; P48668; P12035; P05787; P13647	1	1066.52	3.46e+06	2	0.15	6.64	58
DGAGDVAFIR		1	P02788	0	1020.51	8.94e+05	2	-0.69	16.1	57
NLDLDSIIAEVK		1	Q5XKE5; P35908; P04259; P02538; O95678; P48668; P13647	0	1329.73	1.96e+07	2	0.63	24.48	55
STDYGIFQINSR		1	P61626	0	1400.68	1.74e+06	2	1.04	18.53	55
FASFIDK		1	Q5XKE5; P08729; Q7Z794; Q7RTS7; Q86Y46; P35908; P04259; P02538; Q01546; O95678; P48668; Q9NSB2; P12035; Q3SY84; Q14CN4; P05787; P19013; P13647	0	827.43	1.75e+07	2	0.17	15.07	55
IEISELNR		1	P35908; P04264	0	973.53	1.04e+08	2	-0.24	13.88	53
TYLISSIPLQGAFNYK		1	P12273	0	1814.97	3.16e+06	2	0.18	24.03	52
TITLEVEPSDTIENVK		1	P62987; P62979; P0CG47; P0CG48	0	1787.93	5.30e+05	2	1.77	18.92	52
FQNALLVR		1	P02768	0	960.56	2.36e+06	2	-0.3	15.93	52
VPTANVSVVDLTCR	1xCarbamidomethyl [C13]	1	P04406	0	1530.79	1.26e+06	2	-7.4	17.82	51
QLDSIVGER		1	P02538; P48668; P13647	0	1016.54	3.77e+06	2	-0.12	12.97	51
LAADDFR		1	Q14532; O76015; O76013; P02533; Q15323; Q7Z3Y7; P08727; Q2M2I5; Q14525; P13645; Q92764; P05783; P19012; P13646; Q04695; O76014; P08779	0	807.4	1.51e+08	2	-0.03	11.4	51
AGFAGDDAPR		1	A5A3E0; P63267; P0CG39; P60709; Q6S8J3; P62736; P68133; P0CG38; P68032; P63261	0	976.45	3.97e+06	2	0.63	9.37	51
DAVEDLESVGK		1	P81605	0	1161.56		2	-2.08	15.08	50
AVMDDFAAFVEK	1xOxidation [M3]	1	P02768	0	1358.63	6.83e+05	2	1.98	19.41	50
GSGGLGGACGGAGFGSR	1xCarbamidomethyl [C9]	1	P04259; P02538; P48668	0	1424.63	4.90e+05	2	-0.73	11.46	49
YNQLLR		1	P06733	0	806.45	2.05e+06	2	-2.9	10.95	49
ILLDVK		1	P02533; Q04695	0	700.46	5.67e+06	2	-0.32	15.51	49
KLLEGEECR	1xCarbamidomethyl [C8]	1	Q7RTS7; Q86Y46; P35908; P04259; P02538; Q01546; O95678; P48668; P12036; P13647	1	1133.56	1.07e+06	2	0.33	7.89	48
YTACLCDDNPK	2xCarbamidomethyl [C4; C6]	1	P12273	0	1356.56	2.94e+06	2	0.34	10.24	47
VVDVSVPR		1	Q8IW75	0	870.5	3.71e+05	2	-1.08	12.97	47
SVVTVIDVFYK		1	Q5D862	0	1269.71	2.74e+06	2	1.63	23.76	47
AVFPSIVGRPR		1	A5A3E0; P63267; P60709; Q6S8J3; P62736; P68133; P0CG38; P68032; P63261	1	1198.71	6.24e+05	2	-0.31	15.75	46
VAPEEHPVLLTEAPLNPK		1	P60709; P63261	0	1954.06	4.95e+06	3	1.01	17.55	46
VGDFVATDLDTGRPSTTVR		1	Q02413	1	2007.01		3	-0.13	15.42	45
TQVVAGTNYYIK		1	P01040	0	1356.72	1.69e+06	2	0.15	14.42	45
NIETIINTFHQYSVK		1	P06702	0	1806.94	1.66e+06	3	0.86	21.16	45
ETYGEMADCCAK	2xCarbamidomethyl [C9; C10]; 1xOxidation [M6]	1	P02768	0	1450.53	2.00e+05	2	-0.39	7.43	45
LLEGEECR	1xCarbamidomethyl [C7]	1	Q7RTS7; Q86Y46; P35908; P04259; P02538; Q01546; O95678; P48668; P12036; Q8N1N4; P13647	0	1005.47	8.60e+06	2	-0.31	8.98	43
GSCGIGGGIGGGSSR	1xCarbamidomethyl [C3]	1	P02533; P08779	0	1278.59		2	-2.31	9.8	41
YICENQDSISSK	1xCarbamidomethyl [C3]	1	P02768	0	1443.64	7.50e+05	2	0.24	9.37	40
NHEEEMNALR	1xOxidation [M6]	1	P02533; Q04695	0	1258.55	7.21e+05	2	0.35	6.52	38
LPLLVSK		1	Q96CD2	0	769.52	4.33e+06	2	-0.43	16.88	37
